# Supplementary material for: Bio-Guided Fractionation and Molecular Networking Reveal Fatty Acids to Be Principal Anti-Parasitic Compounds in Nordic Seaweeds
Source: Front Pharmacol. 2021 Jun 2;12:674520. doi: 10.3389/fphar.2021.674520 (PMC8206555; doi:10.3389/fphar.2021.674520)
Supplement: Supplementary file 3 [file DataSheet1.xlsx]

## Sheet: Description
Structure and formula results of compound 1-6 from MS-FINDER

## Sheet: Compound 1
File path: C:\Users\yilu\Downloads\Data from laptop\Software_Yi\MSFINDER ver 3.50\MSDIAL_TEMP\2020_7_17_1212_LBORN0252_BC4_01_22444_38_9.05_277.22.mat
File name: 2020_7_17_1212_LBORN0252_BC4_01_22444_38_9.05_277.22
Title: Unknown
MS1 count: 5302
MSMS count: 132
PRECURSORMZ: 277.2154
PRECURSORTYPE: [M+H]+
Intensity: -1
Retention time: 9.05455
Retention index: 0
Rank	Formula	Mass	Mass error	Score	Resources
1	C18H28O2	276.209	0.0008066	4.395	HMDB,KNApSAcK,ChEBI,SMPDB,FooDB,STOFF,BMDB,LipidMAPS,Urine,Feces,Serum,PubChem,PlantCyc,UNPD,BLEXP,MINE
2	C12H28N4O3	276.216	0.0080172	3.835	ChEBI,PubChem
3	C13H28N2O4	276.205	-0.0032162	3.512
4	C9H24N8O2	276.202	-0.0059015	3.357
5	C8H24N10O	276.213	0.0053318	3.313
6	C11H28N6S	276.21	0.0014923	3.295
7	C9H32N4OS2	276.202	-0.0063699	3.293
8	C15H32O2S	276.212	0.0041777	3.257
9	C14H24N6	276.206	-0.0018788	3.254
10	C8H32N6S2	276.213	0.0048635	3.146
11	C12H28N4OS	276.198	-0.009741	3.132
File path: C:\Users\yilu\Downloads\Data from laptop\Software_Yi\MSFINDER ver 3.50\MSDIAL_TEMP\2020_7_17_1212_LBORN0252_BC4_01_22444_38_9.05_277.22.mat
File name: 2020_7_17_1212_LBORN0252_BC4_01_22444_38_9.05_277.22
Title: Unknown
MS1 count: 5302
MSMS count: 132
PRECURSORMZ: 277.2154
PRECURSORTYPE: [M+H]+
Intensity: -1
Retention time: 9.05455
Retention index: 0
Rank	Title	Score	Retention time	Retention index	Resources	Formula	Ontology	InChIKey	SMILES
1	Stearidonic acid	7.5355	-1	-1	HMDB=HMDB0006547,KNApSAcK=C00000405,ChEBI=CHEBI:32389;CHEBI:77222,SMPDB=PW_C002804,FooDB=FDB002942;FDB004289;FDB004293,BMDB=BMDB06547,LipidMAPS=LMFA01030169;LMFA01030357,Feces=HMDB0006547,Serum=HMDB0006547,PubChem=25245840;5312508,PlantCyc=CPD-12653,UNPD=UNPD1973;UNPD25743;UNPD61521;UNPD228681,BLEXP=BLEXPDB00000163841,COCONUT=CNP0156231	C18H28O2	Lineolic acids and derivatives	JIWBIWFOSCKQMA-LTKCOYKYSA-N	O=C(O)CCCCC=CCC=CCC=CCC=CCC
2	19-Norandrosterone	7.4363	-1	-1	HMDB=HMDB0002697;HMDB0005886,ChEBI=CHEBI:36412,FooDB=FDB023046;FDB023785,BMDB=BMDB02697;BMDB05886,LipidMAPS=LMST02010042,Urine=HMDB0002697;HMDB0005886,Serum=HMDB0002697;HMDB0005886,UNPD=UNPD148438;UNPD38937,BLEXP=BLEXPDB00009548753,COCONUT=CNP0258694	C18H28O2	Estrogens and derivatives	UOUIARGWRPHDBX-AWLYHSJUSA-N	O=C1CCC2C3CCC4CC(O)CCC4C3CCC12C
3	(9Z,12Z)-octadeca-9,12-dien-6-ynoic acid	7.4071	-1	-1	ChEBI=CHEBI:86506,LipidMAPS=LMFA01030734,PlantCyc=CPD-12652,UNPD=UNPD186119;UNPD207386;UNPD210122,COCONUT=CNP0196020	C18H28O2	Long-chain fatty acids	UECZBRRJYAZMDX-HZJYTTRNSA-N	O=C(O)CCCCC#CCC=CCC=CCCCCC
4	Plakolide A;(-)-Plakolide A	7.3443	-1	-1	KNApSAcK=C00043822,UNPD=UNPD27977,COCONUT=CNP0161804	C18H28O2	Gamma butyrolactones	CIUVHSRFRVWPDP-YXZVKYBGNA-N	O=C1OC(C=CC=CCCCCCCCC)(C)CC1=C
5	19-Nor-5-androstenediol	7.2729	-1	-1	HMDB=HMDB0004590,FooDB=FDB023379,BMDB=BMDB04590,LipidMAPS=LMST02010050,BLEXP=BLEXPDB00009900246,COCONUT=CNP0322798	C18H28O2	Estrogens and derivatives	VVUQRXPUVKXAIO-XFUVECHXSA-N	OC1CC2=CCC3C(CCC4(C)C(O)CCC34)C2CC1
6	1,4a,7-trimethyl-1,2,3,4,4a,4b,5,6,7,9,10,10a-dodecahydrophenanthrene-1-carboxylic acid	7.2565	-1	-1	COCONUT=CNP0086195	C18H28O2	Hydrophenanthrenes	AQMKARDJTJSPIX-UHFFFAOYSA-N	O=C(O)C1(C)CCCC2(C)C3C(=CC(C)CC3)CCC12
7	UNPD59307	7.2542	-1	-1	UNPD=UNPD59307,COCONUT=CNP0302923	C18H28O2	Macrolides and analogues	AEOCGZGNXNIVTO-XJEGMNQANA-N	O=C1OC(C=CC=CCCCCCCC1)CC=CCC
8	UNPD122185	7.2346	-1	-1	UNPD=UNPD122185;UNPD154187,COCONUT=CNP0214104	C18H28O2	Sesquiterpenoids	BUWRZRKJRCFAGA-NUCBZMEGNA-N	O=C1C(=C(C=CC(=CCCC(O)C)C)C(C)(C)CC1)C
9	(5Z,9Z,12Z,15Z)-octadecatetraenoic acid	7.2223	-1	-1	ChEBI=CHEBI:86135,LipidMAPS=LMFA01030355;LMFA02000304,PubChem=90658025,UNPD=UNPD208184;UNPD85419;UNPD213766,COCONUT=CNP0172224	C18H28O2	Lineolic acids and derivatives	DNOBNGNBPVOMLW-XRPCLMINSA-N	O=C(O)CCCC=CCCC=CCC=CCC=CCC
10	UNPD160458	7.211	-1	-1	UNPD=UNPD160458,COCONUT=CNP0290410	C18H28O2	Sesquiterpenoids	QDMHHKINLKEGLI-BEPOAESZNA-N	O=C(C=CC1C(=C)CCC2C(C)(CO)CCCC12C)C
11	(E,E)-11,13-Octadecadien-9-ynoic acid	7.205	-1	-1	HMDB=HMDB0034382,FooDB=FDB012763,LipidMAPS=LMFA01030511,UNPD=UNPD184323,COCONUT=CNP0261611	C18H28O2	Long-chain fatty acids	ONYHYSLZNLJFHX-MDAAKZFYSA-N	O=C(O)CCCCCCCC#CC=CC=CCCCC
12	UNPD173429	7.1985	-1	-1	UNPD=UNPD173429,COCONUT=CNP0158919	C18H28O2	Sesquiterpenoids	IYOMABBTSBKXGO-YWYVRKMENA-N	O=C(C=C(O)C1C(=CCC2C(C)(C)CCCC12C)C)C
13	Trichobotrysin F	7.1957	-1	-1	NPA=NPA002864,COCONUT=CNP0282602	C18H28O2	Ketones	FFYQDBBQFAYIDR-KYQAQGQRSA-N	O=C(C)C1C(C(=CC2CCCC(C)C21)C)C3(OC3C)C
14	CNP0437866	7.195	-1	-1	COCONUT=CNP0437866	C18H28O2	Sesquiterpenoids	LWZRCUKCINSBJA-UHFFFAOYSA-N	OC1CC2=CCC3CC(C=C)C(OC)CC3(C)C2CC1
15	13-(methoxymethyl)-10,11,11-trimethyltetracyclo[8.2.1.0?,?.0?,??]tridec-6-en-13-ol	7.1612	-1	-1	COCONUT=CNP0087797	C18H28O2	Sesquiterpenoids	APKNJXZVSIVSTO-UHFFFAOYSA-N	OC1(COC)C2(C)CC3C=CC4CCCC41C3C2(C)C
16	UNPD137223	7.1583	-1	-1	UNPD=UNPD137223;UNPD213943,COCONUT=CNP0110394	C18H28O2	Lineolic acids and derivatives	ZEVMIZQHKILAPM-AUDDJPMTSA-N	O=C(O)CCCC=CC=CCC=CCC=CCCCC
17	8,10-octadecadiynoic acid	7.138	-1	-1	LipidMAPS=LMFA01030536,UNPD=UNPD178324,COCONUT=CNP0239481	C18H28O2	Long-chain fatty acids	JRBUVHZXBJFVBZ-UHFFFAOYSA-N	O=C(O)CCCCCCC#CC#CCCCCCCC
18	4,8,12,15-Octadecatetraenoic acid	7.1127	-1	-1	HMDB=HMDB0032672,FooDB=FDB010626,LipidMAPS=LMFA02000320,UNPD=UNPD181879;UNPD73533,COCONUT=CNP0149777	C18H28O2	Lineolic acids and derivatives	SIVLURJESSFFDP-FLVFHSTKSA-N	O=C(O)CCC=CCCC=CCCC=CCC=CCC
19	17beta-hydroxy-5beta-estran-3-one	7.108	-1	-1	HMDB=HMDB0062677,ChEBI=CHEBI:87333,COCONUT=CNP0082294	C18H28O2	Estrogens and derivatives	RHVBIEJVJWNXBU-XZVKZCCLSA-N	O=C1CCC2C(C1)CCC3C2CCC4(C)C(O)CCC34
20	7,9-octadecadiynoic acid	7.0966	-1	-1	LipidMAPS=LMFA01030532,UNPD=UNPD24547,COCONUT=CNP0343675	C18H28O2	Long-chain fatty acids	LDZUDUYCHODRLO-UHFFFAOYSA-N	O=C(O)CCCCCC#CC#CCCCCCCCC
21	6Z,8E,10E,12Z-Octadecatetraenoic acid	7.08	-1	-1	KNApSAcK=C00000436,COCONUT=CNP0265250	C18H28O2	Lineolic acids and derivatives	RFUWLZKZDWRDDA-MNQUYVSVSA-N	O=C(O)CCCCC=CC=CC=CC=CCCCCC
22	UNPD190101	7.0708	-1	-1	UNPD=UNPD190101,COCONUT=CNP0199401	C18H28O2	Dihydropyranones	WHZFYNOZQWGAQX-PKPWXYQNNA-N	O=C1C=C(OC(C)(C1)CCC2(C(=CCCC2C)C)C)C
23	Dehydrocrepenynic acid	7.0622	-1	-1	LipidMAPS=LMFA01030735	C18H28O2	Long-chain fatty acids	VFYDOTWODCSOBH-ACHWKMRWSA-N	O=C(O)CCCCC#CCC=CCCCC=CCCC
24	UNPD207382	7.0499	-1	-1	UNPD=UNPD207382;UNPD60473;UNPD220633,COCONUT=CNP0130041	C18H28O2	Fatty acid methyl esters	YDFIZHXVIYIJCO-CMDGGOBGSA-N	O=C(OC)CCCCCCC#CC=CCCCCC=C
25	UNPD158331	7.0456	-1	-1	UNPD=UNPD158331,COCONUT=CNP0165610	C18H28O2	Lineolic acids and derivatives	QAECBHSTFKKNOF-SNMKOVQQSA-N	O=C(O)CC=CCC=CCCC=CCCC=CCCC
26	UNPD179923	7.0433	-1	-1	UNPD=UNPD179923,COCONUT=CNP0151777	C18H28O2	Lineolic acids and derivatives	SOQSIPMGMKGFRF-YYYDQDOQSA-N	O=C(O)CC=CCC=CCC=CCCCCC=CCC
27	9,11-octadecadiynoic acid	7.0423	-1	-1	LipidMAPS=LMFA01030539,UNPD=UNPD98549,COCONUT=CNP0269017	C18H28O2	Long-chain fatty acids	KRKKLNBMQJXYTE-UHFFFAOYSA-N	O=C(O)CCCCCCCC#CC#CCCCCCC
28	10-(4-hydroxybutyl)-4,11,11-trimethyltricyclo[5.3.1.0?,?]undec-4-en-3-one	7.0408	-1	-1	COCONUT=CNP0094892	C18H28O2	Sesquiterpenoids	IMRRTMCIGNGCAG-UHFFFAOYSA-N	O=C1C(=C2CC3CCC(CCCCO)C2(C1)C3(C)C)C
29	3Z,6Z,9Z,12Z-Octadecatetraenoic acid	7.0407	-1	-1	LipidMAPS=LMFA02000323	C18H28O2	Lineolic acids and derivatives	WIGBMAOBGOCVRT-DOFZRALJSA-N	O=C(O)CC=CCC=CCC=CCC=CCCCCC
30	11E,17-Octadecadien-9-ynoic acid	7.0367	-1	-1	LipidMAPS=LMFA01031088,UNPD=UNPD178719,COCONUT=CNP0205788	C18H28O2	Long-chain fatty acids	PVLHKMGYBLUVEL-BQYQJAHWSA-N	O=C(O)CCCCCCCC#CC=CCCCCC=C
31	UNPD83716	7.0328	-1	-1	UNPD=UNPD83716,COCONUT=CNP0287582	C18H28O2	Sesquiterpenoids	NDTDEVRGTYZRRA-FGZPUGOTNA-N	O=C1C=C(C)C(CCC(=O)C)C2(C)CCCC(C)(C)C12
32	5-undecyl-2H-1,3-benzodioxole	7.0235	-1	-1	COCONUT=CNP0420488	C18H28O2		WPKSHCKNVIUZMF-UHFFFAOYSA-N	O1C2=CC=C(C=C2OC1)CCCCCCCCCCC
33	UNPD18978	7.0231	-1	-1	UNPD=UNPD18978,COCONUT=CNP0237213	C18H28O2	Sesquiterpenoids	ACKYYVOKVMZDCL-AWMLGPFDNA-N	O=C1C(=C(CCC(=O)C)C2(C)CCCC(C)(C)C2C1)C
34	2E,4E,6E,11Z-octadecatetraenoic acid	7.0076	-1	-1	LipidMAPS=LMFA01030813	C18H28O2	Lineolic acids and derivatives	JDMHAZURDKGOJZ-JOOTUHJOSA-N	O=C(O)C=CC=CC=CCCCC=CCCCCCC
35	UNPD160108	7.0063	-1	-1	UNPD=UNPD160108,COCONUT=CNP0262147	C18H28O2	Lineolic acids and derivatives	PORPGKSIWVNTJC-KBQRSDMBSA-N	O=C(O)CCC=CC=CC=CC=CCCCCCCC
36	5,8,11,14-octadecatetraenoic acid	6.9973	-1	-1	LipidMAPS=LMFA01030354;LMFA01030356	C18H28O2	Lineolic acids and derivatives	UCHYLNQKIYPHBX-ARQYDCTJSA-N	O=C(O)CCCC=CCC=CCC=CCC=CCCC
37	14,15-Dehydrocrepenynic acid	6.9743	-1	-1	KNApSAcK=C00047136,LipidMAPS=LMFA01031062,UNPD=UNPD78209,COCONUT=CNP0318135	C18H28O2	Long-chain fatty acids	HJYQCZVMQAYTMN-ACHWKMRWSA-N	O=C(O)CCCCCCCC=CCC#CC=CCCC
38	2,5-octadecadiynoic acid	6.9688	-1	-1	LipidMAPS=LMFA01030512,BLEXP=BLEXPDB00005312642,COCONUT=CNP0137178	C18H28O2	Long-chain fatty acids	NFCMYYTVFCALRH-UHFFFAOYSA-N	O=C(O)C#CCC#CCCCCCCCCCCCC
39	10,12-octadecadiynoic acid	6.9541	-1	-1	ChEBI=CHEBI:32411,LipidMAPS=LMFA01030542,COCONUT=CNP0085954	C18H28O2	Long-chain fatty acids	WNNYSRHBDYRXCH-UHFFFAOYSA-N	O=C(O)CCCCCCCCC#CC#CCCCCC
40	3E,9Z,12Z,15Z-octadecatetraenoic acid	6.951	-1	-1	LipidMAPS=LMFA01030167,UNPD=UNPD41218,COCONUT=CNP0372715	C18H28O2	Lineolic acids and derivatives	JNIPNHCEUZIVID-BPJKAVOUSA-N	O=C(O)CC=CCCCCC=CCC=CCC=CCC
41	Heisteric acid	6.9429	-1	-1	LipidMAPS=LMFA01031067	C18H28O2	Long-chain fatty acids	IOWMGGBYHCCEJN-MDFXNHGISA-N	O=C(O)CCCCCC=CC#CC=CCCCCCC
42	Ixoric acid	6.942	-1	-1	LipidMAPS=LMFA02000296,UNPD=UNPD93658,COCONUT=CNP0329521	C18H28O2	Lineolic acids and derivatives	FCQPVKRMQXBSAO-GGBIPKAMSA-N	O=C(O)CCCCCCC=CC=CC=CC=CCCC
43	UNPD77708	6.9396	-1	-1	UNPD=UNPD77708,COCONUT=CNP0317714	C18H28O2	Elisabethane diterpenoids	MPZCKSXAXSTSKM-BOLGGRDFNA-N	O=C(CC)C12C(=O)C(C)CCC2C(C)CC1C=C(C)C
44	7,10-octadecadiynoic acid	6.9394	-1	-1	LipidMAPS=LMFA01030533	C18H28O2	Long-chain fatty acids	BYQKSGMKNWVMLG-UHFFFAOYSA-N	O=C(O)CCCCCC#CCC#CCCCCCCC
45	5,10-octadecadiynoic acid	6.935	-1	-1	LipidMAPS=LMFA01030525	C18H28O2	Long-chain fatty acids	KZXQAJGXSHZKBP-UHFFFAOYSA-N	O=C(O)CCCC#CCCCC#CCCCCCCC
46	6,10-octadecadiynoic acid	6.9331	-1	-1	LipidMAPS=LMFA01030529	C18H28O2	Long-chain fatty acids	PHGMAGAJZJGCBD-UHFFFAOYSA-N	O=C(O)CCCCC#CCCC#CCCCCCCC
47	parinaric acid	6.9164	-1	-1	ChEBI=CHEBI:32408;CHEBI:32409;CHEBI:32410;CHEBI:32414;CHEBI:32416,LipidMAPS=LMFA01030171;LMFA01030358;LMFA01030764;LMFA02000328,UNPD=UNPD65715;UNPD84103;UNPD88186,BLEXP=BLEXPDB00000107981,COCONUT=CNP0308184	C18H28O2	Lineolic acids and derivatives	IJTNSXPMYKJZPR-UHFFFAOYSA-N	O=C(O)CCCCCCCC=CC=CC=CC=CCC
48	UNPD82313	6.9163	-1	-1	UNPD=UNPD82313,COCONUT=CNP0308726	C18H28O2	Long-chain fatty alcohols	YZQVZNIBOPZYDK-UTKXXTPHSA-N	OCC=CC=CC#CCC=CCCCCCCCCO
49	kinoprene	6.915	-1	-1	ChEBI=CHEBI:39243,STOFF=STOFF_10087,COCONUT=CNP0320963	C18H28O2	Sesquiterpenoids	FZRBKIRIBLNOAM-WHVZTFIZNA-N	O=C(OCC#C)C=C(C=CCC(C)CCCC(C)C)C
50	8,11-octadecadiynoic acid	6.9138	-1	-1	LipidMAPS=LMFA01030537	C18H28O2	Long-chain fatty acids	LYBSSOSQYBXSJT-UHFFFAOYSA-N	O=C(O)CCCCCCC#CCC#CCCCCCC
51	7,11-octadecadiynoic acid	6.9075	-1	-1	LipidMAPS=LMFA01030534	C18H28O2	Long-chain fatty acids	MZLHSGZHMBVBEH-UHFFFAOYSA-N	O=C(O)CCCCCC#CCCC#CCCCCCC
52	6,11-octadecadiynoic acid	6.9012	-1	-1	LipidMAPS=LMFA01030530	C18H28O2	Long-chain fatty acids	AXYITESCXIMQFI-UHFFFAOYSA-N	O=C(O)CCCCC#CCCCC#CCCCCCC
53	4,9-octadecadiynoic acid	6.8998	-1	-1	LipidMAPS=LMFA01030521	C18H28O2	Long-chain fatty acids	GUABOZSBYLESTL-UHFFFAOYSA-N	O=C(O)CCC#CCCCC#CCCCCCCCC
54	5,9-octadecadiynoic acid	6.8998	-1	-1	LipidMAPS=LMFA01030524	C18H28O2	Long-chain fatty acids	HWCVHTFNKLJJOX-UHFFFAOYSA-N	O=C(O)CCCC#CCCC#CCCCCCCCC
55	6,9-octadecadiynoic acid	6.8979	-1	-1	LipidMAPS=LMFA01030528	C18H28O2	Long-chain fatty acids	OPCJGOAJOMSTDL-UHFFFAOYSA-N	O=C(O)CCCCC#CCC#CCCCCCCCC
56	8,12-octadecadiynoic acid	6.8928	-1	-1	LipidMAPS=LMFA01030538	C18H28O2	Long-chain fatty acids	MEJYPUUEPZCBCO-UHFFFAOYSA-N	O=C(O)CCCCCCC#CCCC#CCCCCC
57	octadeca-4,8,11,15-tetraenoic acid	6.8878	-1	-1	COCONUT=CNP0231604	C18H28O2	Lineolic acids and derivatives	GODPUQPTJYDDHR-UHFFFAOYSA-N	O=C(O)CCC=CCCC=CCC=CCCC=CCC
58	7,12-octadecadiynoic acid	6.8864	-1	-1	LipidMAPS=LMFA01030535	C18H28O2	Long-chain fatty acids	ROLICKMUZJIMHZ-UHFFFAOYSA-N	O=C(O)CCCCCC#CCCCC#CCCCCC
59	5,12-octadecadiynoic acid	6.882	-1	-1	LipidMAPS=LMFA01030526	C18H28O2	Long-chain fatty acids	BUXCSJDWVXTDJU-UHFFFAOYSA-N	O=C(O)CCCC#CCCCCCC#CCCCCC
60	4,7-octadecadiynoic acid	6.8809	-1	-1	LipidMAPS=LMFA01030519	C18H28O2	Long-chain fatty acids	JSTBIUQACALUMP-UHFFFAOYSA-N	O=C(O)CCC#CCC#CCCCCCCCCCC
61	3,8-octadecadiynoic acid	6.8809	-1	-1	LipidMAPS=LMFA01030517	C18H28O2	Long-chain fatty acids	FDBNNFPVUKARAN-UHFFFAOYSA-N	O=C(O)CC#CCCCC#CCCCCCCCCC
62	5,7-octadecadiynoic acid	6.8809	-1	-1	LipidMAPS=LMFA01030522	C18H28O2	Long-chain fatty acids	VTTZLZZKHKSOGQ-UHFFFAOYSA-N	O=C(O)CCCC#CC#CCCCCCCCCCC
63	4,8-octadecadiynoic acid	6.8809	-1	-1	LipidMAPS=LMFA01030520	C18H28O2	Long-chain fatty acids	YZDIRPUOQIVUSQ-UHFFFAOYSA-N	O=C(O)CCC#CCCC#CCCCCCCCCC
64	5,8-octadecadiynoic acid	6.8809	-1	-1	LipidMAPS=LMFA01030523	C18H28O2	Long-chain fatty acids	MHMJNTYERCHXIG-UHFFFAOYSA-N	O=C(O)CCCC#CCC#CCCCCCCCCC
65	3,7-octadecadiynoic acid	6.8809	-1	-1	LipidMAPS=LMFA01030516	C18H28O2	Long-chain fatty acids	BXKXNRAEEDHUMI-UHFFFAOYSA-N	O=C(O)CC#CCCC#CCCCCCCCCCC
66	6,12-octadecadiynoic acid	6.8801	-1	-1	LipidMAPS=LMFA01030531	C18H28O2	Long-chain fatty acids	NZILIUHFHRGRCI-UHFFFAOYSA-N	O=C(O)CCCCC#CCCCCC#CCCCCC
67	4,6-octadecadiynoic acid	6.8794	-1	-1	LipidMAPS=LMFA01030518	C18H28O2	Long-chain fatty acids	RGZWZLKPKGMDHL-UHFFFAOYSA-N	O=C(O)CCC#CC#CCCCCCCCCCCC
68	3,6-octadecadiynoic acid	6.8794	-1	-1	LipidMAPS=LMFA01030515	C18H28O2	Long-chain fatty acids	RJRKSJOZHKLGBL-UHFFFAOYSA-N	O=C(O)CC#CCC#CCCCCCCCCCCC
69	6,8-octadecadiynoic acid	6.8791	-1	-1	LipidMAPS=LMFA01030527	C18H28O2	Long-chain fatty acids	NEJYDLCCBBXZFL-UHFFFAOYSA-N	O=C(O)CCCCC#CC#CCCCCCCCCC
70	2,7-octadecadiynoic acid	6.8743	-1	-1	LipidMAPS=LMFA01030514	C18H28O2	Long-chain fatty acids	WOSPAZIVFDEIQC-UHFFFAOYSA-N	O=C(O)C#CCCCC#CCCCCCCCCCC
71	2,6-octadecadiynoic acid	6.8727	-1	-1	LipidMAPS=LMFA01030513	C18H28O2	Long-chain fatty acids	HWFDGMJFXCTDJG-UHFFFAOYSA-N	O=C(O)C#CCCC#CCCCCCCCCCCC
72	(2E,4E,6E,8E)-octadeca-2,4,6,8-tetraenoic acid	6.8719	-1	-1	BLEXP=BLEXPDB00011778225,COCONUT=CNP0231341	C18H28O2	Lineolic acids and derivatives	LGHXTTIAZFVCCU-SSVNFBSYSA-N	O=C(O)C=CC=CC=CC=CCCCCCCCCC
73	6-[3]-ladderane-hexanoic acid	6.8637	-1	-1	LipidMAPS=LMFA01140005	C18H28O2	Medium-chain fatty acids	AYMKDPCMEDAVJJ-UHFFFAOYNA-N	O=C(O)CCCCCC1CCC2C(C1)C3C4CCC4C23
74	9,12-octadecadiynoic acid	6.8289	-1	-1	LipidMAPS=LMFA01030540,BLEXP=BLEXPDB00000001931	C18H28O2	Long-chain fatty acids	KDYILQLPKVZDGB-UHFFFAOYSA-N	O=C(O)CCCCCCCC#CCC#CCCCCC
75	UNPD23941	6.813	-1	-1	UNPD=UNPD23941,COCONUT=CNP0138342	C18H28O2	Cyclohexenones	CIUORYCGUNFGHQ-NRIWMAMSNA-N	O=C1C=C(C)C2(C)CCC(C)C(C)(CCC(=O)C)C2C1
76	ethyl (6Z,9Z,12Z)-hexadeca-6,9,12,15-tetraenoate	6.8111	-1	-1	ChEBI=CHEBI:84935	C18H28O2	Fatty acid esters	SLXBQEDLVODPNT-QNEBEIHSSA-N	O=C(OCC)CCCCC=CCC=CCC=CCC=C
77	8E,10E-Octadecadien-12-ynoic acid	6.7874	-1	-1	LipidMAPS=LMFA01031051	C18H28O2	Long-chain fatty acids	DTTMENSUKKOUKN-BNFZFUHLSA-N	O=C(O)CCCCCCC=CC=CC#CCCCCC
78	9,13-octadecadiynoic acid	6.7665	-1	-1	LipidMAPS=LMFA01030541	C18H28O2	Long-chain fatty acids	HWLHUMZSJBFKMO-UHFFFAOYSA-N	O=C(O)CCCCCCCC#CCCC#CCCCC
79	10,13-octadecadiynoic acid	6.6995	-1	-1	LipidMAPS=LMFA01030543	C18H28O2	Long-chain fatty acids	KHRMBDFLKOJUOF-UHFFFAOYSA-N	O=C(O)CCCCCCCCC#CCC#CCCCC
80	10,14-octadecadiynoic acid	6.6317	-1	-1	LipidMAPS=LMFA01030544	C18H28O2	Long-chain fatty acids	VDKBUECZBKBXQU-UHFFFAOYSA-N	O=C(O)CCCCCCCCC#CCCC#CCCC
81	UNPD195137	6.6252	-1	-1	UNPD=UNPD195137,COCONUT=CNP0137108	C18H28O2	Phenol ethers	RMZUHPQNJVYTSB-UHFFFAOYSA-N	O(C1=CC(=CC=C1C(=C)COCC(C)C)C)CC(C)C
82	CNP0443530	6.6242	-1	-1	COCONUT=CNP0443530	C18H28O2		RLKWPLRRBMENRI-UHFFFAOYSA-N	O=C1C=C(C(=O)C=C1C)CCCCCCCCCCC
83	decylplastoquinone	6.6033	-1	-1	ChEBI=CHEBI:72953	C18H28O2	P-benzoquinones	APNQQQRDLMWNLM-UHFFFAOYSA-N	O=C1C=C(C(=O)C(=C1C)C)CCCCCCCCCC
84	11,14-octadecadiynoic acid	6.5646	-1	-1	LipidMAPS=LMFA01030545	C18H28O2	Long-chain fatty acids	QNHHXLZCDIPCSL-UHFFFAOYSA-N	O=C(O)CCCCCCCCCC#CCC#CCCC
85	12,14-octadecadiynoic acid	6.5294	-1	-1	LipidMAPS=LMFA01030547	C18H28O2	Long-chain fatty acids	WSAFAXYKIFSAKZ-UHFFFAOYSA-N	O=C(O)CCCCCCCCCCC#CC#CCCC
86	UNPD22645	6.5289	-1	-1	UNPD=UNPD22645,COCONUT=CNP0118504	C18H28O2	Long-chain fatty acids	IXEHFJJSVBVZHI-UHFFFAOYSA-N	O=C(O)CCCCCCCCCCCC=1C=CC=CC1
87	11,15-octadecadiynoic acid	6.4968	-1	-1	LipidMAPS=LMFA01030546	C18H28O2	Long-chain fatty acids	YOQIENDWPOTTQW-UHFFFAOYSA-N	O=C(O)CCCCCCCCCC#CCCC#CCC
88	UNPD63915	6.4849	-1	-1	UNPD=UNPD63915,COCONUT=CNP0323328	C18H28O2	Acyclic diterpenoids	WOSWLPBJUVEXMK-KAVGSWPWSA-N	O=C(C=C(C)C)CC(=CCCC(=CCCC(=O)C)C)C
89	UNPD135932	6.4759	-1	-1	UNPD=UNPD135932,COCONUT=CNP0258501	C18H28O2	Sesquiterpenoids	LUXFAZPVINNUAJ-RNPYNJAESA-N	O=C(C=C(C)C)C=C(C)CCCC(=CCCC(=O)C)C
90	12,15-octadecadiynoic acid	6.4616	-1	-1	LipidMAPS=LMFA01030548	C18H28O2	Long-chain fatty acids	VSLXDLSYRQJCDS-UHFFFAOYSA-N	O=C(O)CCCCCCCCCCC#CCC#CCC
91	Phenyl Undecanoic Acid Methyl Ester 6.4384 -1 -1 COCONUT=CNP0080397 C18H28O2 OEYUUCWCJJESQQ-UHFFFAOYSA-N O=C(OC)CCCCCCCCCCC=1C=CC=CC1_x000D_ 92 ethyl 10-phenyldecanoate 6.4382 -1 -1 COCONUT=CNP0393045 C18H28O2 Fatty acid esters MCHBMLAAPKVHBG-UHFFFAOYSA-N O=C(OCC)CCCCCCCCCC=1C=CC=CC1_x000D_ 93 13,16-octadecadiynoic acid 6.4298 -1 -1 LipidMAPS=LMFA01030550 C18H28O2 Long-chain fatty acids FOZLHZDGH…

## Sheet: Compound 2
File path: C:\Users\yilu\Downloads\Data from laptop\Software_Yi\MSFINDER ver 3.50\MSDIAL_TEMP\2020_7_17_1245_LBORN0242_BB2_01_22433_78_9.4_303.23.mat
File name: 2020_7_17_1245_LBORN0242_BB2_01_22433_78_9.4_303.23
Title: Unknown
MS1 count: 4770
MSMS count: 194
PRECURSORMZ: 303.2318
PRECURSORTYPE: [M+H]+
Intensity: 261387
Retention time: 9.40155
Retention index: 0
Rank	Formula	Mass	Mass error	Score	Resources
1	C20H30O2	302.225	5.67e-05	4.47	HMDB,KNApSAcK,ChEBI,DrugBank,SMPDB,T3DB,FooDB,NANPDB,STOFF,BMDB,LipidMAPS,Urine,Saliva,Feces,Serum,PubChem,PlantCyc,UNPD,BLEXP,MINE
2	C17H34O2S	302.228	0.0034278	3.782	BLEXP
3	C15H30N2O4	302.221	-0.0039661	3.652	MINE
4	C14H30N4O3	302.232	0.0072673	3.495	MINE
5	C8H30N8O2S	302.221	-0.0032803	3.387
6	C10H26N10O	302.229	0.0045819	3.288
7	C11H26N8O2	302.218	-0.0066515	3.267
8	C13H30N6S	302.225	0.0007424	3.216
9	C16H26N6	302.222	-0.0026287	3.168
10	C11H34N4OS2	302.217	-0.0071198	3.167
11	C12H35N2O2PS	302.216	-0.0088376	3.151
12	C10H34N6S2	302.229	0.0041135	3.097
13	C14H38O2S2	302.231	0.0067989	3.071
14	C7H22N14	302.215	-0.0093368	2.787
File path: C:\Users\yilu\Downloads\Data from laptop\Software_Yi\MSFINDER ver 3.50\MSDIAL_TEMP\2020_7_17_1245_LBORN0242_BB2_01_22433_78_9.4_303.23.mat
File name: 2020_7_17_1245_LBORN0242_BB2_01_22433_78_9.4_303.23
Title: Unknown
MS1 count: 4770
MSMS count: 194
PRECURSORMZ: 303.2318
PRECURSORTYPE: [M+H]+
Intensity: 261387
Retention time: 9.40155
Retention index: 0
Rank	Title	Score	Retention time	Retention index	Resources	Formula	Ontology	InChIKey	SMILES
1	Eicosapentaenoic acid	8.122	-1	-1	HMDB=HMDB0001999,KNApSAcK=C00000408;C00001215,ChEBI=CHEBI:28364;CHEBI:58562;CHEBI:92823,DrugBank=DB00159,SMPDB=PW_C001337,FooDB=FDB003102;FDB030126,NANPDB=NANPDB_2184,BMDB=BMDB01999,LipidMAPS=LMFA01030759;LMFA01030761;LMFA01031116;LMFA01031117,Urine=HMDB0001999,Feces=HMDB0001999,Serum=HMDB0001999,PubChem=25245749;446284,PlantCyc=5Z8Z11Z14Z17Z-EICOSAPENTAENOATE,UNPD=UNPD116167;UNPD187471;UNPD22438…	C20H30O2	Long-chain fatty acids	JAZBEHYOTPTENJ-JLNKQSITSA-N	O=C(O)CCCC=CCC=CCC=CCC=CCC=CCC
2	Isopimaric acid	8.0255	-1	-1	HMDB=HMDB0036811,KNApSAcK=C00003444,ChEBI=CHEBI:6039;CHEBI:58924;CHEBI:63659;CHEBI:63731,FooDB=FDB015757,NANPDB=NANPDB_4957;NANPDB_4999,LipidMAPS=LMPR0104080010;LMPR0104080011,Saliva=HMDB0036811,PubChem=56927945;25201251;12311180;442048,PlantCyc=CPD-8729,UNPD=UNPD107442;UNPD146433;UNPD154155;UNPD166870;UNPD74981;UNPD94512;UNPD96524;UNPD212852	C20H30O2	Diterpenoids	MXYATHGRPJZBNA-UHFFFAOYNA-N	O=C(O)C1(C)CCCC2(C)C3C(=CCC12)CC(C=C)(C)CC3
3	Methyltestosterone	7.9527	-1	-1	HMDB=HMDB0015655,ChEBI=CHEBI:27436;CHEBI:125362,DrugBank=DB06710,T3DB=T3D4748,STOFF=STOFF_4078,LipidMAPS=LMST02020029,Urine=HMDB0015655,Serum=HMDB0015655,UNPD=UNPD184227,BLEXP=BLEXPDB00000006010	C20H30O2	Androgens and derivatives	GCKMFJBGXUYNAG-HLXURNFRSA-N	O=C1C=C2CCC3C(CCC4(C)C3CCC4(O)C)C2(C)CC1
4	Abietic acid;7,13-Abietadien-18-oic acid	7.9487	-1	-1	KNApSAcK=C00000871;C00036013,ChEBI=CHEBI:28987;CHEBI:35680,NANPDB=NANPDB_3267;NANPDB_4990;NANPDB_4991,LipidMAPS=LMPR0104050001,PubChem=25099;10569,PlantCyc=CPD-8694,UNPD=UNPD10070;UNPD114711;UNPD120636;UNPD159190;UNPD164855;UNPD184220;UNPD40588,BLEXP=BLEXPDB00000090895	C20H30O2	Diterpenoids	RSWGJHLUYNHPMX-HSFHVDEGNA-N	O=C(O)C1(C)CCCC2(C)C3C(C=C(CC3)C(C)C)=CCC12
5	8,13-Abietadien-18-oic acid	7.9241	-1	-1	HMDB=HMDB0038172,ChEBI=CHEBI:29660,FooDB=FDB017403,NANPDB=NANPDB_3271,LipidMAPS=LMPR0104050012,PubChem=25200989;443613,PlantCyc=CPD-8717,UNPD=UNPD167368;UNPD169870;UNPD36159;UNPD38501	C20H30O2	Diterpenoids	MLBYBBUZURKHAW-UHFFFAOYNA-N	O=C(O)C1(C)CCCC2(C3=C(C=C(CC3)C(C)C)CCC12)C
6	ent-Kaur-16-en-19-oic acid;ent-Kaurenoic acid;Cunabic acid	7.8471	-1	-1	KNApSAcK=C00000881;C00037368,ChEBI=CHEBI:15417;CHEBI:57297,FooDB=FDB005672;FDB021671;FDB030846,LipidMAPS=LMPR0104130004,PubChem=25200785;73062,PlantCyc=CPD1F-132,UNPD=UNPD125067;UNPD162963;UNPD167186;UNPD170333;UNPD181618;UNPD183606;UNPD22550;UNPD29896;UNPD73526;UNPD89210;UNPD225144,BLEXP=BLEXPDB00000433869	C20H30O2	Kaurane diterpenoids	NIKHGUQULKYIGE-PBVIHWKCNA-N	O=C(O)C1(C)CCCC2(C)C1CCC34CC(=C)C(CCC32)C4
7	Neoabietic acid	7.7894	-1	-1	ChEBI=CHEBI:29653,NANPDB=NANPDB_3268,LipidMAPS=LMPR0104050004,PubChem=25202082;221118,PlantCyc=CPD-8712,UNPD=UNPD158130;UNPD21623;UNPD45972;UNPD64987	C20H30O2	Diterpenoids	KGMSWPSAVZAMKR-ONCXSQPRSA-N	O=C(O)C1(C)CCCC2(C)C3C(=CC(=C(C)C)CC3)CCC12
8	L-Pimaric acid	7.7632	-1	-1	ChEBI=CHEBI:29615,NANPDB=NANPDB_3270,PubChem=25201105;221062,PlantCyc=CPD-8708,UNPD=UNPD12808	C20H30O2	Diterpenoids	RWWVEQKPFPXLGL-ONCXSQPRSA-N	O=C(O)C1(C)CCCC2(C)C3C(=CC(=CC3)C(C)C)CCC12
9	Oryzalexin A	7.7518	-1	-1	KNApSAcK=C00003461,ChEBI=CHEBI:78258,FooDB=FDB001529,PubChem=158755,UNPD=UNPD22013;UNPD29244	C20H30O2	Diterpenoids	QOWLIQGNZBOQNG-SUDZFBBCNA-N	O=C1C2=CC(C=C)(C)CCC2C3(C)CCC(O)C(C)(C)C3C1
10	(+)-Pimaric acid	7.7257	-1	-1	KNApSAcK=C00003468;C00031283;C00037105;C00048379;C00049953,ChEBI=CHEBI:39;CHEBI:69240,NANPDB=NANPDB_4998,UNPD=UNPD10746;UNPD123567;UNPD197059;UNPD44967;UNPD51544;UNPD57383;UNPD62976;UNPD89319;UNPD89563;UNPD96704,BLEXP=BLEXPDB00000220338	C20H30O2	Diterpenoids	MHVJRKBZMUDEEV-HGURHXMQNA-N	O=C(O)C1(C)CCCC2(C)C3C(=CC(C=C)(C)CC3)CCC12
11	Methenolone	7.7046	-1	-1	HMDB=HMDB0041928,ChEBI=CHEBI:135283,STOFF=STOFF_5576,LipidMAPS=LMST02020028,UNPD=UNPD26435,BLEXP=BLEXPDB00003037705	C20H30O2	Androgens and derivatives	ANJQEDFWRSLVBR-YQCBOQQQNA-N	O=C1C=C(C)C2(C)C(C1)CCC3C2CCC4(C)C(O)CCC34
12	ent-8(17),13(16),14-Labdatrien-18-oic acid	7.6828	-1	-1	HMDB=HMDB0039486,KNApSAcK=C00023275,FooDB=FDB019092,UNPD=UNPD11170;UNPD153416;UNPD166139;UNPD17202;UNPD172053;UNPD184169	C20H30O2	Diterpenoids	JEGUVXRNDRXUDN-UHFFFAOYNA-N	O=C(O)C1(C)CCCC2(C)C(C(=C)CCC12)CCC(=C)C=C
13	Mulin-11,13-dien-20-oic acid;(+)-Mulin-11,13-dien-20-oic acid	7.6742	-1	-1	KNApSAcK=C00037520,UNPD=UNPD73755,BLEXP=BLEXPDB00010614343	C20H30O2	Valparane and mulinane diterpenoids	VLUGUFKIJBWGCW-FKXVMCHFNA-N	O=C(O)C12CCC3(C)CC=C(C=CC3C2CCC1C(C)C)C
14	Acanthoic acid;(-)-Acanthoic acid	7.6508	-1	-1	KNApSAcK=C00035989,UNPD=UNPD118770;UNPD143760;UNPD36139;UNPD5042;UNPD55845;UNPD69074;UNPD230101,BLEXP=BLEXPDB00009861219	C20H30O2	Diterpenoids	TVHDZSRRHQKNEZ-QXAKWGPSNA-N	O=C(O)C1(C)CCCC2(C3=CCC(C=C)(C)CC3CCC12)C
15	8,15-Isopimaradien-18-oic acid	7.6357	-1	-1	HMDB=HMDB0035692,FooDB=FDB014410,UNPD=UNPD132838;UNPD140492;UNPD5967	C20H30O2	Diterpenoids	BFPAVSSBPLQXJZ-UHFFFAOYNA-N	O=C(O)C1(C)CCCC2(C3=C(CCC12)CC(C=C)(C)CC3)C
16	Labda-7,12(E),14-triene-17-oic acid;(-)-Labda-7,12(E),14-triene-17-oic acid	7.6355	-1	-1	KNApSAcK=C00041029,UNPD=UNPD139772;UNPD182847	C20H30O2	Diterpenoids	OYARUPGUBJDJCZ-FSFOCWGSNA-N	O=C(O)C1=CCC2C(C)(C)CCCC2(C)C1CC=C(C=C)C
17	Oryzalexin B;(+)-Oryzalexin B	7.6169	-1	-1	KNApSAcK=C00034090,FooDB=FDB001857,PubChem=176496,UNPD=UNPD41749	C20H30O2	Diterpenoids	PXSLLXAAZWPICX-PREOKMCVNA-N	O=C1CCC2(C)C3C(=CC(C=C)(C)CC3)C(O)CC2C1(C)C
18	(-)-Ozic acid;Ozic acid	7.615	-1	-1	KNApSAcK=C00023283;C00023285;C00023287;C00036233;C00038087;C00040738,NANPDB=NANPDB_4997,UNPD=UNPD11528;UNPD117113;UNPD12244;UNPD124947;UNPD132385;UNPD16743;UNPD181505;UNPD189648;UNPD198224;UNPD52317;UNPD58255;UNPD8403;UNPD92118;UNPD216155;UNPD228333;UNPD230478	C20H30O2	Diterpenoids	YGBZFOQXPOGACY-JKXKIACLNA-N	O=C(O)C1(C)CCCC2(C)C(C(=C)CCC12)CC=C(C=C)C
19	Gibberosin K;(+)-Gibberosin K	7.6131	-1	-1	KNApSAcK=C00030379,ChEBI=CHEBI:65960,UNPD=UNPD37389	C20H30O2	Xeniaphyllane and xenicane diterpenoids	HFOYWBKBWBSCMJ-AZZIXRIZNA-N	O=C(C=CC(O)(C)C)C1(C)CC2C(=C)CCC=C(C)CCC21
20	Yucalexin A16	7.6091	-1	-1	HMDB=HMDB0036775,FooDB=FDB015717,UNPD=UNPD81562	C20H30O2	Atisane diterpenoids	AFZCVSRIUXFFJO-UHFFFAOYNA-N	O=C1CCC2(C)C(CCC34C=CC(CC32)C(O)(C)C4)C1(C)C
21	Sacculatanolide;(-)-Sacculatanolide	7.5992	-1	-1	KNApSAcK=C00035390,UNPD=UNPD92571	C20H30O2	Naphthofurans	LVGAEQWFJYHNAW-YDFKPMHZNA-N	O=C1OCC2C1=CCC3C(C)(CCC=C(C)C)CCCC23C
22	11-oxo-ent-cassa-12,15-dien-3alpha-ol	7.5957	-1	-1	ChEBI=CHEBI:72658	C20H30O2	Isocopalane and spongiane diterpenoids	YIBIQGNVXNLHOE-MFKVJZQJSA-N	O=C1C=C(C=C)C(C)C2CCC3C(C)(C)C(O)CCC3(C)C12
23	8beta-Hydroxy-9(11),13-abietadien-12-one;(-)-8beta-Hydroxy-9(11),13-abietadien-12-one	7.595	-1	-1	KNApSAcK=C00041294,UNPD=UNPD103988;UNPD35828	C20H30O2	Diterpenoids	DWDOXTINEVOYSV-FHOCCHNENA-N	O=C1C=C2C(O)(C=C1C(C)C)CCC3C2(C)CCCC3(C)C
24	ent-3,13(16),14-Clerodtrien-17-oic acid;Infuscaic acid	7.5879	-1	-1	KNApSAcK=C00023509,UNPD=UNPD91365	C20H30O2	Colensane and clerodane diterpenoids	IDFBKACEWOZHRY-YWTSGMDRNA-N	O=C(O)C1CCC2(C(=CCCC2C1(C)CCC(=C)C=C)C)C
25	Yucalexin B14	7.5773	-1	-1	HMDB=HMDB0036709,FooDB=FDB015645,UNPD=UNPD76147	C20H30O2	Diterpenoids	JPKPHLVETUEKFT-UHFFFAOYNA-N	O=C1CC2C3(C=CC1(C)C3)CCC4C(C)(C)C(O)CCC24C
26	Dolabeserpenoic acid A;(-)-Dolabeserpenoic acid A	7.5772	-1	-1	KNApSAcK=C00037064,UNPD=UNPD87965	C20H30O2	Dolabellane and neodolabellane diterpenoids	YQRHFPSCUBKRIZ-GWIVXDKONA-N	O=C(O)C1=CCCC(=CCC2(C)CC=C(C(C)C)C2CC1)C
27	Lophodienone;(-)-Lophodienone	7.5768	-1	-1	KNApSAcK=C00041638,UNPD=UNPD85862	C20H30O2	Sesquiterpenoids	FBCYNTCAJCSDGD-BFSXURPKNA-N	O=C1C(=CC=CC(C)CCC2OC2(C)CCC(C(=C)C)C1)C
28	(+)-Luricularic acid	7.5732	-1	-1	LipidMAPS=LMPR0104100002,UNPD=UNPD158513;UNPD78334;UNPD93643	C20H30O2	4-carboxy steroids	XFHAKDIYTJGGSQ-VRISVKGDNA-N	O=C(O)C1(C)CCCC2(C)C3CCC(=C)C(C=C)C3CCC12
29	sandaracopimaradienolal	7.5705	-1	-1	ChEBI=CHEBI:69239,UNPD=UNPD203140	C20H30O2	Diterpenoids	YDVNGHMXZNRYKV-DIQOWNEKNA-N	O=CC1(C)C(O)CCC2(C)C3C(=CC(C=C)(C)CC3)CCC12
30	Magdalenic acid	7.5686	-1	-1	LipidMAPS=LMPR0104210001,UNPD=UNPD36507	C20H30O2	Germacrane sesquiterpenoids	WFSJUNZXGBJBSF-ACMDZDHZNA-N	O=C(O)C1=CCCC(=CC2C(C(=C)CCC2C(C)C)CC1)C
31	Isopachydictyolal;(-)-Isopachydictyolal	7.5667	-1	-1	KNApSAcK=C00035666,UNPD=UNPD158168;UNPD20143	C20H30O2	Pachydictyane and cneorubin diterpenoids	BPLZGSCDXJUDTI-KXXRTTMQNA-N	O=CC1=CCC(C(O)C2C(=CCC12)C)C(C)CCC=C(C)C
32	Hugorosenone;(+)-Hugorosenone	7.5661	-1	-1	KNApSAcK=C00033925,UNPD=UNPD124325	C20H30O2	Hydrophenanthrenes	QPBXGHPGNJJSFO-ISTGRNGQNA-N	O=C1C=C2C(CCC3CC(C=C)(C)CCC23C)C(C)(C)C1O
33	Pisiferanol;(+)-Pisiferanol	7.5623	-1	-1	KNApSAcK=C00031045,ChEBI=CHEBI:66549,UNPD=UNPD141687	C20H30O2	Diterpenoids	UZNOTFOFROXACM-MQEFSVKANA-N	OC=1C=C2C(=CC1C(C)C)CCC3C(O)(C2)CCCC3(C)C
34	Sagittine A	7.5618	-1	-1	KNApSAcK=C00041813,UNPD=UNPD193694	C20H30O2	Sesquiterpenoids	NVQMSTNGSLMEJX-SNGCENOFNA-N	O=C(O)C1(C2=CCC3CC(C=C)(C)CCC3(C)C2CCC1)C
35	Retinyl ester	7.5615	-1	-1	HMDB=HMDB0003598,SMPDB=PW_C001935,FooDB=FDB023204,BMDB=BMDB03598,Serum=HMDB0003598,PubChem=5460164,BLEXP=BLEXPDB00005460164	C20H30O2	Retinoids	WWDMJSSVVPXVSV-YCNIQYBTNA-N	O=C(O)C=C(C=CC=C(C=CC1C(C)CCCC1(C)C)C)C
36	11-Hydroxy-3-oxo-labda-8(17),13(16),14-triene	7.5606	-1	-1	KNApSAcK=C00036401,UNPD=UNPD81802	C20H30O2	Diterpenoids	RYIPUFTVAFKGEU-XGZBUKOQNA-N	O=C1CCC2(C)C(C(=C)CCC2C1(C)C)C(O)CC(=C)C=C
37	Siderone	7.5588	-1	-1	HMDB=HMDB0036703,FooDB=FDB015639,UNPD=UNPD60532	C20H30O2	Kaurane diterpenoids	CTULHRFLFQFJDU-UHFFFAOYNA-N	O=C1CC2C(C)(CO)CCCC2(C)C3CCC4C(=CC13C4)C
38	Dictyolactone	7.553	-1	-1	KNApSAcK=C00044708,UNPD=UNPD10391;UNPD156097;UNPD87448	C20H30O2	Gamma butyrolactones	NXLGBKUVXJCGJY-HURSXHGLNA-N	O=C1OCC2C1=CCC=C(C)CCC2C(C)CCC=C(C)C
39	Crotocembraneic acid	7.5515	-1	-1	KNApSAcK=C00036941;C00037544,UNPD=UNPD133793;UNPD834;UNPD214080	C20H30O2	Cembrane diterpenoids	PJVZQWKLUCVIQA-RJVZQQKXSA-N	O=C(O)C1=CCCC(=CCCC(=CC=C(CC1)C(C)C)C)C
40	Oxendolone	7.5483	-1	-1	ChEBI=CHEBI:31946,BLEXP=BLEXPDB00000443947	C20H30O2	Estrogens and derivatives	FCKLFGKATYPJPG-JQLKYCOYNA-N	O=C1C=C2CCC3C(CCC4(C)C(O)C(CC)CC34)C2CC1
41	Totaradiol;3beta-Hydroxytotarol	7.5452	-1	-1	KNApSAcK=C00032365,NANPDB=NANPDB_4955,UNPD=UNPD178223;UNPD66653	C20H30O2	Diterpenoids	NORGIWDZGWMMGU-KNQOLKPNNA-N	OC1=CC=C2C(=C1C(C)C)CCC3C2(C)CCC(O)C3(C)C
42	Isohinokiol	7.544	-1	-1	KNApSAcK=C00039446,UNPD=UNPD152223;UNPD23353;UNPD62050	C20H30O2	Diterpenoids	ODFCWXVQZAQDSO-YCMVCDJLNA-N	OC=1C=C2C(=CC1C(C)C)CCC3C2(C)CCC(O)C3(C)C
43	ent-7,13-Labdadien-16,15-olide	7.5416	-1	-1	KNApSAcK=C00022767,UNPD=UNPD170436	C20H30O2	Diterpene lactones	FCBWPZUMDLQAIK-FIVHGIJGNA-N	O=C1OCC=C1CCC2C(=CCC3C(C)(C)CCCC23C)C
44	Dysienone;(-)-Dysienone	7.5377	-1	-1	KNApSAcK=C00042482,UNPD=UNPD72012	C20H30O2	Secondary alcohols	LQTADMSVJQUTPA-UARUNLKKNA-N	O=C1C=CC(O)C1CC2C(=CCC3C(C)(C)CCCC23C)C
45	Excoecarin K;(-)-Excoecarin K	7.5344	-1	-1	KNApSAcK=C00046739,UNPD=UNPD3215	C20H30O2	Kaurane diterpenoids	RSQQQISKAKDLSC-RKNHAAGINA-N	O=C1CC2(C)C(CCC34CC(=C)C(CCC32)C4)C(C)(C)C1O
46	Tagalsin G;(+)-Tagalsin G	7.5316	-1	-1	KNApSAcK=C00035402,UNPD=UNPD1486;UNPD188153	C20H30O2	Colensane and clerodane diterpenoids	GJYCSCFUJNJVHU-RXEZISPPNA-N	O=C1C(O)=C(C)C2(C)CCC3CC(C=C)(C)CCC3(C)C2C1
47	9alpha-Hydroxyisopimara-8(14),15-dien-7-one;(-)-9alpha-Hydroxyisopimara-8(14),15-dien-7-one	7.531	-1	-1	KNApSAcK=C00035983,UNPD=UNPD115364	C20H30O2	Hydrophenanthrenes	RXEQRZFQTQKNLN-UUULDXMSNA-N	O=C1C2=CC(C=C)(C)CCC2(O)C3(C)CCCC(C)(C)C3C1
48	mibolerone	7.5298	-1	-1	ChEBI=CHEBI:34849,BLEXP=BLEXPDB00004619902	C20H30O2	Estrogens and derivatives	PTQMMNYJKCSPET-OMHQDGTGSA-N	O=C1C=C2CC(C)C3C(CCC4(C)C3CCC4(O)C)C2CC1
49	Forskoditerpene A	7.5279	-1	-1	KNApSAcK=C00030311,UNPD=UNPD120654	C20H30O2	Carbocyclic fatty acids	NLQNGKMQUWEKQY-CDSFRYCNNA-N	O=C(O)C=C(C)C1CC21C(=CCC3C(C)(C)CCCC32C)C
50	6beta-hydroxyferruginol	7.5277	-1	-1	ChEBI=CHEBI:70577;CHEBI:138944,FooDB=FDB007010,UNPD=UNPD13598;UNPD188217;UNPD88090	C20H30O2	Diterpenoids	PRYXPGFZVGZNBL-IBRIVNBONA-N	OC=1C=C2C(=CC1C(C)C)CCC3C2(C)CC(O)CC3(C)C
51	norethandrolone	7.5261	-1	-1	ChEBI=CHEBI:135282,BLEXP=BLEXPDB00000005858	C20H30O2	Gluco/mineralocorticoids, progestogins and derivatives	ZDHCJEIGTNNEMY-NVSXFXLENA-N	O=C1C=C2CCC3C(CCC4(C)C3CCC4(O)CC)C2CC1
52	3alpha-Hydroxyvalpara-4,15-dien-2-one	7.5261	-1	-1	KNApSAcK=C00042118,UNPD=UNPD83429	C20H30O2	Valparane and mulinane diterpenoids	JQQHFIYBHXOKCW-ICKICYLPNA-N	O=C1CC2(C)CCC3C(C(=C)C)CCC3(C)C2C=CC1(O)C
53	7,17-Sacculatadien-11,12-olide	7.5234	-1	-1	KNApSAcK=C00035236,UNPD=UNPD70483	C20H30O2	Naphthofurans	RLWQDHRIPBACLZ-FTLAVVRGNA-N	O=C1OCC2=CCC3C(C)(CCC=C(C)C)CCCC3(C)C12
54	(1R,3E,7S,8S,11S,12S)-7,8-Epoxy-14-oxo-3,18-dolabelladiene	7.5233	-1	-1	ChEBI=CHEBI:69950;CHEBI:69951,UNPD=UNPD150373;UNPD81431	C20H30O2	Dolabellane and neodolabellane diterpenoids	BGCBFCPMURPDPJ-VCOGQJIPNA-N	O=C1CC(C(=C)C)C2CCC3(OC3CCC(=CCC12C)C)C
55	3,4-secoisopimara-4(18),7,15-triene-3-oic acid	7.5215	-1	-1	ChEBI=CHEBI:66459,UNPD=UNPD176025	C20H30O2	Carboxylic acids	XQZUWQQUDZZOHA-YWTSGMDRNA-N	O=C(O)CCC1(C)C(C(=C)C)CC=C2CC(C=C)(C)CCC21
56	[2R-[2alpha(Z),4beta,4abeta]]-2,3,4,4a,7,8-Hexahydro-1,6-dimethyl-4-(1-methylethyl)-2-naphthalenyl ester 2-methyl-2-butenoic acid	7.5212	-1	-1	KNApSAcK=C00020055,UNPD=UNPD4200	C20H30O2	Sesquiterpenoids	CHTNJNLLXNEPBK-VFPHHJAONA-N	O=C(OC1C(=C2CCC(=CC2C(C1)C(C)C)C)C)C(=CC)C
57	Knightal	7.5179	-1	-1	KNApSAcK=C00047952,UNPD=UNPD187556	C20H30O2	Cembrane diterpenoids	BKIITODBJFJABE-PKUPFTDUNA-N	O=CC1=CCC(C(=C)C)CCC(=CCCC2(OC2CC1)C)C
58	Yuexiandajisu B;(+)-Yuexiandajisu B	7.5176	-1	-1	KNApSAcK=C00043122,UNPD=UNPD30156;UNPD219598	C20H30O2	Cembrane diterpenoids	JXHXWPLGLBBOQS-INEXPVDJNA-N	O=C(O)C1=CC2C(CCC(=CCCC(=CCC1)C)C)C2(C)C
59	Abeoanticopalic acid	7.5113	-1	-1	KNApSAcK=C00023455,UNPD=UNPD162918	C20H30O2	Medium-chain fatty acids	AYZMGUHJPVGYEB-QQFSOEFFNA-N	O=C(O)C=C(C)CCC1C(=C)CCC2C(=C)C(C)CCC12C
60	Dysokusone E	7.5111	-1	-1	KNApSAcK=C00046729,UNPD=UNPD10435	C20H30O2	Diterpenoids	BQQIWANTQQHPOM-DCTOETQONA-N	O=C1C=C(C)C2CC(C(=CC=CC(O)(C)C)C)CCC2(C)C1
61	Cycloanticopalic acid;Metasequoic acid B	7.5069	-1	-1	KNApSAcK=C00023458,UNPD=UNPD108907;UNPD126616;UNPD7772	C20H30O2	Medium-chain fatty acids	PCLDEDSUWNZZDJ-RFSDKSJDNA-N	O=C(O)C=C(C)CCC1C(=C)CCC2C1(C)CCC3CC32C
62	19-Hydroxyferruginol	7.5029	-1	-1	KNApSAcK=C00031522;C00044421,ChEBI=CHEBI:79531,UNPD=UNPD177980;UNPD29845;UNPD61699	C20H30O2	Diterpenoids	ZSMYLYMVTJVQIR-UKKDRVSFNA-N	OC=1C=C2C(=CC1C(C)C)CCC3C2(C)CCCC3(C)CO
63	3alpha-Hydroxy-1(15),8(19)-trinervitadien-2-one	7.501	-1	-1	KNApSAcK=C00042115,UNPD=UNPD162008;UNPD190554;UNPD39432	C20H30O2	Diterpenoids	VXHXPUWLVSAWNZ-CXBTVNSQNA-N	O=C1C2=C(C)C3C(C(=C)CCCC(C)CC2)CCC3(C)C1O
64	Cyanthiwigin Z;(-)-Cyanthiwigin Z	7.4952	-1	-1	KNApSAcK=C00048674,UNPD=UNPD17980	C20H30O2	Diterpenoids	MIIMOZSUCXJQND-IFSGAGMCNA-N	O=C1C=C(C)CCC2C3C(=CC(O)C3(C)CCC12C)C(C)C
65	71448974	7.4936	-1	-1	PubChem=71448974	C20H30O2	Aphidicolane and stemodane diterpenoids	REZQHIIQALKSCD-WKSOIMLMSA-N	O=C(O)C1(C)CCCC2(C)C1CCC3CC4C(=C)CCC32C4
66	ent-7,13-Labdadien-15,16-olide	7.4933	-1	-1	KNApSAcK=C00022766,UNPD=UNPD169825	C20H30O2	Diterpene lactones	DVCPCCPPWBALGF-FIVHGIJGNA-N	O=C1OCC(=C1)CCC2C(=CCC3C(C)(C)CCCC23C)C
67	Neodictyolactone	7.4922	-1	-1	KNApSAcK=C00035695,UNPD=UNPD7650	C20H30O2	Butenolides	JBDGMKIVDKWNHE-IKLHAPTBNA-N	O=C1OCC2=C1C(CCC(=CCC2)C)C(C)CCC=C(C)C
68	ent-Beyer-15-en-19-oic acid	7.4819	-1	-1	KNApSAcK=C00048378,UNPD=UNPD166286;UNPD169375;UNPD18347;UNPD21506;UNPD31399;UNPD72818;UNPD97953	C20H30O2	Diterpenoids	MVCPPAWXGSLXQJ-KMIJAHQMNA-N	O=C(O)C1(C)CCCC2(C)C3CCC4(C=CC3(CCC12)C4)C
69	9beta-hydroxypumiloxide	7.4788	-1	-1	KNApSAcK=C00022309,UNPD=UNPD169103	C20H30O2	Heteroaromatic compounds	RHGPNSHMEJUHGA-JIBUTUIPNA-N	OC1C(=C)C(CC=2OC=CC2C)C3(C)CCCC(C)(C)C3C1
70	17beta-hydroxy-2alpha,17-dimethylestr-4-en-3-one	7.4781	-1	-1	ChEBI=CHEBI:79761	C20H30O2	Estrogens and derivatives	JQIGNJUHWXILBM-NYYZLJODNA-N	O=C1C=C2CCC3C(CCC4(C)C3CCC4(O)C)C2CC1C
71	17-Hydroxy-19-nor-17alpha-pregn-5(10)-en-3-one	7.4767	-1	-1	ChEBI=CHEBI:79526	C20H30O2	Gluco/mineralocorticoids, progestogins and derivatives	FWRAUZJFURIEHP-SLHNCBLASA-N	O=C1CC2=C(CC1)C3CCC4(C)C(CCC4(O)CC)C3CC2
72	(8R,9S,10R,13S,14S,17S)-17-hydroxy-2,10,13-trimethyl-1,2,6,7,8,9,11,12,14,15,16,17-dodecahydrocyclopenta[a]phenanthren-3-one	7.4746	-1	-1	BLEXP=BLEXPDB00018595214	C20H30O2	Androgens and derivatives	LUVLKZXUYIMQHY-GVQVYCJZSA-N	O=C1C=C2CCC3C(CCC4(C)C(O)CCC34)C2(C)CC1C
73	Pisiferol	7.4745	-1	-1	KNApSAcK=C00040024,UNPD=UNPD1876;UNPD2059	C20H30O2	Diterpenoids	NKGGFTFDYGTUSL-MQEFSVKANA-N	OC=1C=C2C(=CC1C(C)C)CCC3C2(CO)CCCC3(C)C
74	Stenbolone	7.4734	-1	-1	ChEBI=CHEBI:34980,LipidMAPS=LMST02020044	C20H30O2	Androgens and derivatives	GYBGISLVORKLBN-YNZDMMAESA-N	O=C1C(=CC2(C)C(C1)CCC3C2CCC4(C)C(O)CCC34)C
75	Helifulvanic acid	7.4724	-1	-1	KNApSAcK=C00000887,UNPD=UNPD14494	C20H30O2	Villanovane, atisane, trachylobane or helvifulvane diterpenoids	MWAMRLIQNGNHLA-WLYBUGLONA-N	O=C(O)C1(C)CCCC2(C)C1CCC3CC4(C)C5CC32CC54
76	Sarcophytoxide;(+)-Sarcophytoxide	7.4709	-1	-1	KNApSAcK=C00031299,NANPDB=NANPDB_123,UNPD=UNPD100717;UNPD101187;UNPD104917;UNPD120695;UNPD192328;UNPD202551;UNPD44631;UNPD85631;UNPD213865;UNPD226728	C20H30O2	Dihydrofurans	OQGXDKRHMBRZCS-YWRHCMBNNA-N	O1CC(=C2CCC(=CCCC3(OC3CCC(=CC12)C)C)C)C
77	(8R,9S,13S,14S,17S)-17-hydroxy-1,1,13-trimethyl-2,6,7,8,9,10,11,12,14,15,16,17-dodecahydrocyclopenta[a]phenanthren-3-one	7.4699	-1	-1	BLEXP=BLEXPDB00129670607	C20H30O2	Estrogens and derivatives	RIVFINIJQIUCBG-VPIJAGQFSA-N	O=C1C=C2CCC3C(CCC4(C)C(O)CCC34)C2C(C)(C)C1
78	17beta-Hydroxy-7alpha-methylandrost-4-en-3-one	7.4699	-1	-1	ChEBI=CHEBI:34183	C20H30O2	Androgens and derivatives	HZWZHWTZLZZBFF-UQYBFTDGSA-N	O=C1C=C2CC(C)C3C(CCC4(C)C(O)CCC34)C2(C)CC1
79	(8R,9S,10R,13S,14S,17S)-17-hydroxy-1,10,13-trimethyl-1,2,6,7,8,9,11,12,14,15,16,17-dodecahydrocyclopenta[a]phenanthren-3-one	7.4691	-1	-1	BLEXP=BLEXPDB00056633219	C20H30O2	Androgens and derivatives	KROXBRXHRBCDNO-OLGCGSEZSA-N	O=C1C=C2CCC3C(CCC4(C)C(O)CCC34)C2(C)C(C)C1
80	[1R-[1R*,2E,4S*(Z),6E,10S*]]-3,7,11,11-Tetramethylbicyclo[8.1.0]undeca-2,6-dien-4-yl ester 2-methyl-2-butenoic acid	7.4682	-1	-1	KNApSAcK=C00012430,UNPD=UNPD145431;UNPD72473	C20H30O2	Bicyclogermacrane and isolepidozane sesquiterpenoids	ZSPXEMQYKDXZCE-SFLRLGIZNA-N	O=C(OC1C(=CC2C(CCC(=CC1)C)C2(C)C)C)C(=CC)C
81	17beta-Hydroxy-1,17-dimethylestr-5(10)-en-3-one	7.4642	-1	-1	ChEBI=CHEBI:79590	C20H30O2	Oxosteroids	LNILKVZKBQKVRH-HCHYHSJESA-N	O=C1CC2=C(C(C)C1)C3CCC4(C)C(CCC4(O)C)C3CC2
82	Callicarpic acid A;(-)-Callicarpic acid A	7.462	-1	-1	KNApSAcK=C00047203,UNPD=UNPD67825	C20H30O2	Carboxylic acids	YJZGFOZCXWCRQH-ZAVBHSNDNA-N	O=C(O)CCC1(C)C(C(=C)C)CC=C2C=C(CCC21)C(C)C
83	(7R,8R,9S,10R,11S,13S,14S,17S)-17-hydroxy-7,11,13-trimethyl-2,6,7,8,9,10,11,12,14,15,16,17-dodecahydro-1H-cyclopenta[a]phenanthren-3-one	7.4545	-1	-1	BLEXP=BLEXPDB00009882863	C20H30O2	Estrogens and derivatives	KVIKZOGGZHCGFH-RJMNTABLSA-N	O=C1C=C2CC(C)C3C4CCC(O)C4(C)CC(C)C3C2CC1
84	Doianoterpene C;(-)-Doianoterpene C	7.4534	-1	-1	KNApSAcK=C00035595,UNPD=UNPD31477	C20H30O2	Kaurane diterpenoids	CRENVNKSLGXMGW-PWVQHALZNA-N	O=CC1=CC23CCC4C(C)(CO)CCCC4(C)C3CCC1C2
85	17beta-Hydroxy-6beta-methylandrost-4-en-3-one	7.4528	-1	-1	ChEBI=CHEBI:79417;CHEBI:79701	C20H30O2	Androgens and derivatives	QRHBXQAFGLVWFW-BEQVDIJNSA-N	O=C1C=C2C(C)CC3C(CCC4(C)C(O)CCC34)C2(C)CC1
86	Angustanol;(+)-Angustanol	7.4506	-1	-1	KNApSAcK=C00049993,UNPD=UNPD196285;UNPD62991;UNPD71806	C20H30O2	Diterpenoids	FKCPLBHSZGVMNG-KLRVPOMUNA-N	OCC1(C)CCCC2(C3=CC=C(C=C3CCC21)C(O)(C)C)C
87	Agallochin G;(-)-Agallochin G	7.4498	-1	-1	KNApSAcK=C00045215,UNPD=UNPD98165	C20H30O2	Naphthopyrans	RRYTXWAMRRHHAA-GSHAMKAVNA-N	OC12OCC3(CC1)C4CCC5(C=CC4(CCC3C2(C)C)C5)C
88	90658320	7.4495	-1	-1	PubChem=90658320	C20H30O2	Fusicoccane diterpenoids	RXBOBOBBUFBTEQ-HTZGKGDFSA-N	O=CC1C2=CC3(C(=C(CC3)C(C)C)CC(O)C(C)C2CC1)C
89	Dolabellane analog-7	7.446	-1	-1	ChEBI=CHEBI:69947,UNPD=UNPD25841;UNPD52164	C20H30O2	Ketones	GUSAEAVUMKCIQK-RJGVROHTNA-N	O=C1CC(C(=C)C)C2CCC(=CCCC3(OC3CC12C)C)C
90	(3E,5E,10E)-7-Hydroxy-13-keto-3,7,11,15-tetramethylhexadeca-1,3,5,10,14-pentaene	7.4442	-1	-1	KNApSAcK=C00022052;C00022055,UNPD=UNPD123228;UNPD35430;UNPD56826	C20H30O2	Sesquiterpenoids	WUHOVSGGPXLETP-ZAMRDYMMNA-N	O=C(C=C(C)C)CC(=CCCC(O)(C=CC=C(C=C)C)C)C
91	Obtunone;(-)-Obtunone	7.4433	-1	-1	KNApSAcK=C00032082,UNPD=UNPD174803;UNPD2983	C20H30O2	Sesquiterpenoids	WRAJYVCWLBXQEW-VUWGLLQZNA-N	O=C1C2C(=CC(CC2C(=C)CCC=C(C)C)C1(O)C)C(C)C
92	Labda-8(17),13(14)-dien-15,16-olide;(+)-Labda-8(17),13(14)-dien-15,16-olide	7.4398	-1	-1	KNApSAcK=C00033099,UNPD=UNPD142551;UNPD34917	C20H30O2	Diterpene lactones	RUXYUBRFOACSMM-KNQOLKPNNA-N	O=C1OCC(=C1)CCC2C(=C)CCC3C(C)(C)CCCC23C
93	ent-Kaur-16-en-13-hydroxy-19-al;(-)-ent-Kaur-16-en-13-hydroxy-19-al	7.439	-1	-1	KNApSAcK=C00039111,UNPD=UNPD142886;UNPD31389	C20H30O2	Kaurane diterpenoids	FCBPGJGLXFXABE-ZHOAEPBGNA-N	O=CC1(C)CCCC2(C)C1CCC34CC(=C)C(O)(CCC32)C4
94	5Z,7E,9E,14Z,17Z-Eicosapentaenoic acid	7.439	-1	-1	KNApSAcK=C00000438,ChEBI=CHEBI:29457;CHEBI:60025,LipidMAPS=LMFA01030760,PubChem=5282061,UNPD=UNPD155048;UNPD49659	C20H30O2	Long-chain fatty acids	XGTCGDUVXWLURC-FZNBEQTOSA-N	O=C(O)CCCC=CC=CC=CCCCC=CCC=CCC
95	16-Hydroxy-ferruginol;(+)-16-Hydroxy-ferruginol	7.4389	-1	-1	KNApSAcK=C00048933,NANPDB=NANPDB_2542,UNPD=UNPD162174;UNPD62240	C20H30O2	Diterpenoids	HHUCTBWMRRWQII-QEETWSSONA-N	OC=1C=C2C(=CC1C(C)CO)CCC3C2(C)CCCC3(C)C
96	Trachyloban-18-oic acid;(-)-Trachyloban-18-oic acid	7.4314	-1	-1	KNApSAcK=C00037922;C00037923,FooDB=FDB021677,UNPD=UNPD118327;UNPD12831;UNPD57657	C20H30O2	Kaurane diterpenoids	FLGAFUAMEXILLB-KZZRUURRNA-N	O=C(O)C1(C)CCCC2(C)C1CCC34CC5C(CC32)C5(C)C4
97	Crotonkinin A	7.4312	-1	-1	KNApSAcK=C00038867,UNPD=UNPD30824	C20H30O2	Kaurane diterpenoids	FKUNRSJLNKRKMY-QVALCLBRNA-N	O=C1CC2C(C)(C)CCCC2(C)C3CCC4C(=C)CC13C4O
98	17beta-Hydroxy-4-methylandrost-4-en-3-one	7.4272	-1	-1	ChEBI=CHEBI:79913	C20H30O2	Androgens and derivatives	RSOKUNXLBOCFIH-INAMJSSCSA-N	O=C1C(=C2CCC3C(CCC4(C)C(O)CCC34)C2(C)CC1)C
99	ent-19-Hydroxykaur-16-en	7.4269	-1	-1	KNApSAcK=C00035602,UNPD=UNPD187626;UNPD188430;UNPD193019	C20H30O2	Kaurane diterpenoids	NYWYTVLBFMICLI-JRJCQVJQNA-N	O=C1C(=C)C2CCC3C1(CCC4C(C)(CO)CCCC34C)C2
100	Flexusine B;(-)-Flexusine B	7.426	-1	-1	KNApSAcK=C00039217,UNPD=UNPD115967	C20H30O2	Sesquiterpenoids	XYGZKBQEGUFULA-STMTZMBSNA-N	O=C1C(=CC2OC2(C)CCC=C(C)CCC=C(C)C1)C(C)C
101	3-tetradecylsulfanylpropanoic acid	6.1032	-1	-1	BLEXP=BLEXPDB00000150912	C17H34O2S	Straight chain fatty acids	OWXXRDGGTZWLQY-UHFFFAOYSA-N	O=C(O)CCSCCCCCCCCCCCCCC
102	3-(myristylthio)propionic acid	6.1032	-1	-1	BLEXP=BLEXPDB00000150912	C17H34O2S	Straight chain fatty acids	OWXXRDGGTZWLQY-UHFFFAOYSA-N	O=C(O)CCSCCCCCCCCCCCCCC
103	1-cyclononyl-1-hydroxy-thionan-2-ol	5.3272	-1	-1		C17H34O2S	Organoheterocyclic compounds	RYFHIDXIBQJIPJ-UHFFFAOYSA-N	OC1CCCCCCCS1(O)C2CCCCCCCC2
104	1-(1,4-oxathian-2-yl)tridecan-1-ol	5.2595	-1	-1		C17H34O2S	Oxathianes	MSVHMDNHHPKBDA-UHFFFAOYSA-N	OC(CCCCCCCCCCCC)C1OCCSC1
105	1-[2-[(dimethylamino)methyl]morpholino]-3-(tetrahydrofurfuryloxy)propan-2-ol	5.2053	-1	-1		C15H30N2O4	Morpholines	ROOUYAONDHZGMR-UHFFFAOYSA-N	OC(COCC1OCCC1)CN2CCOC(CN(C)C)C2
106	(3aS,4R,6R,7aR)-5-(6-aminohexyl)-2,2-dimethyl-4-methylol-4,6,7,7a-tetrahydro-3aH-[1,3]dioxolo[4,5-c]pyridin-6-ol	5.1868	-1	-1		C15H30N2O4	Ketals	RSMMMKMUCUZZMJ-SYQHCUMBSA-N	OCC1N(CCCCCCN)C(O)CC2OC(OC21)(C)C
107	3-[glyceryl(propyl)amino]pyrrolidine-1-carboxylic acid tert-butyl ester	5.1542	-1	-1		C15H30N2O4		KNSAPBCJNAYFCZ-UHFFFAOYSA-N	O=C(OC(C)(C)C)N1CCC(N(CCC)CC(O)CO)C1
108	3-hydroxy-3-[[3-hydroxypropyl(methyl)amino]methyl]piperidine-1-carboxylic acid tert-butyl ester	5.1533	-1	-1		C15H30N2O4		APACYTSICVNFRW-UHFFFAOYSA-N	O=C(OC(C)(C)C)N1CCCC(O)(C1)CN(C)CCCO
109	4-hydroxy-4-[(1-methylolpropylamino)methyl]piperidine-1-carboxylic acid tert-butyl ester	5.151	-1	-1		C15H30N2O4		SINIOVJZPVYSLJ-UHFFFAOYSA-N	O=C(OC(C)(C)C)N1CCC(O)(CNC(CO)CC)CC1
110	(2R,3R)-3-hydroxy-2-methyl-tetradecanethioic acid S-ethyl ester	5.144	-1	-1		C17H34O2S	Fatty acyl thioesters	UIGXGQLQYRHARS-HZPDHXFCSA-N	O=C(SCC)C(C)C(O)CCCCCCCCCCC
111	4-[[ethyl(2-hydroxyethyl)amino]methyl]-4-hydroxy-piperidine-1-carboxylic acid tert-butyl ester	5.1398	-1	-1		C15H30N2O4		RRMNWUPPJVJFIL-UHFFFAOYSA-N	O=C(OC(C)(C)C)N1CCC(O)(CN(CC)CCO)CC1
112	2-[2-hydroxyethyl(2-morpholinoethyl)amino]acetic acid isoamyl ester	5.1309	-1	-1		C15H30N2O4		DSQBQRUVBZXYIS-UHFFFAOYSA-N	O=C(OCCC(C)C)CN(CCO)CCN1CCOCC1
113	1-(tert-butylamino)-3-[(Z)-(2,2-dimethylolcyclohexylidene)amino]oxy-propan-2-ol	5.127	-1	-1		C15H30N2O4		WUALFUBBNRLMEI-LGMDPLHJSA-N	OCC1(C(=NOCC(O)CNC(C)(C)C)CCCC1)CO
114	N-[(1S,2R)-2-hydroxy-3-(methylamino)-1-(tetrahydropyran-4-ylmethyl)propyl]carbamic acid tert-butyl ester	5.1256	-1	-1		C15H30N2O4	Oxanes	RSUQNFANQXSTDG-QWHCGFSZSA-N	O=C(OC(C)(C)C)NC(CC1CCOCC1)C(O)CNC
115	N-[[(2R,3R,4R,5R)-1-heptyl-3,4-dihydroxy-5-methylol-pyrrolidin-2-yl]methyl]acetamide	5.1248	-1	-1		C15H30N2O4	N-alkylpyrrolidines	HWKOPHVHQHKBCL-KBUPBQIOSA-N	O=C(NCC1N(CCCCCCC)C(CO)C(O)C1O)C
116	N-[2-hydroxy-3-[3-(2-hydroxyethyl)pyrrolidino]propyl]-N-methyl-carbamic acid tert-butyl ester	5.1206	-1	-1		C15H30N2O4		BBMFBHBBRYWSRG-UHFFFAOYSA-N	O=C(OC(C)(C)C)N(C)CC(O)CN1CCC(C1)CCO
117	N-(2-methoxyethyl)carbamic acid 2-[cyclohexylmethyl(2-hydroxyethyl)amino]ethyl ester	5.1168	-1	-1		C15H30N2O4		QLBZSBOUOORRPT-UHFFFAOYSA-N	O=C(OCCN(CCO)CC1CCCCC1)NCCOC
118	2-[2-hydroxyethyl(3-morpholinopropyl)amino]-4-methyl-valeric acid	5.113	-1	-1		C15H30N2O4		VFSPZRVWIHWPMO-UHFFFAOYSA-N	O=C(O)C(N(CCO)CCCN1CCOCC1)CC(C)C
119	(2S,6R)-7-hydroxy-6-(4-methylhexylthio)-2-propyl-enanthaldehyde	5.1067	-1	-1		C17H34O2S	Dialkylthioethers	PISSFHGGBNNATC-LRUHZDSUSA-N	O=CC(CCC)CCCC(SCCCC(C)CC)CO
120	N-[(1S,2S,3S)-2,3-dihydroxy-1-isopropyl-3-[(2S)-pyrrolidin-2-yl]propyl]carbamic acid tert-butyl ester	5.1048	-1	-1		C15H30N2O4	Pyrrolidines	TYAFWGHRHMYCGO-CYDGBPFRSA-N	O=C(OC(C)(C)C)NC(C(O)C(O)C1NCCC1)C(C)C
121	3-[4-hydroxybutyl(2-hydroxyethyl)amino]pyrrolidine-1-carboxylic acid tert-butyl ester	5.1011	-1	-1		C15H30N2O4		XGRCCFGQGPSECY-UHFFFAOYSA-N	O=C(OC(C)(C)C)N1CCC(N(CCO)CCCCO)C1
122	3-[(2-hydroxy-3-methoxy-propyl)amino]-2-methyl-piperidine-1-carboxylic acid tert-butyl ester	5.0949	-1	-1		C15H30N2O4		SMAQXSPXSYGECK-UHFFFAOYSA-N	O=C(OC(C)(C)C)N1CCCC(NCC(O)COC)C1C
123	(2S)-2-(hexylthio)-2-methyl-capric acid	5.0942	-1	-1		C17H34O2S	Medium-chain fatty acids	VLRQLDXOJBYHJD-KRWDZBQOSA-N	O=C(O)C(SCCCCCC)(C)CCCCCCCC
124	N-[3-[cyclobutyl(2-hydroxyethyl)amino]-2-hydroxy-propyl]-N-methyl-carbamic acid tert-butyl ester	5.0927	-1	-1		C15H30N2O4		SLBJCNWHKKFFTH-UHFFFAOYSA-N	O=C(OC(C)(C)C)N(C)CC(O)CN(CCO)C1CCC1
125	2-[(hexylthio)methyl]-8-methyl-pelargonic acid	5.0888	-1	-1		C17H34O2S	Medium-chain fatty acids	WVWCHSCKBXGMQQ-UHFFFAOYSA-N	O=C(O)C(CSCCCCCC)CCCCCC(C)C
126	5-(hexylthio)-2,8-dimethyl-pelargonic acid	5.0613	-1	-1		C17H34O2S	Medium-chain fatty acids	FLWRYSOVQSZNEM-UHFFFAOYSA-N	O=C(O)C(C)CCC(SCCCCCC)CCC(C)C
127	3-[[(E)-tetradec-1-enyl]thio]propane-1,2-diol	5.0564	-1	-1		C17H34O2S	1,2-diols	CKHLYJABLCFMMT-BUHFOSPRSA-N	OCC(O)CSC=CCCCCCCCCCCCC
128	N-[3-[[(3R,4S)-4-hydroxytetrahydrofuran-3-yl]-methyl-amino]-2,2-dimethyl-propyl]carbamic acid tert-butyl ester	5.0482	-1	-1		C15H30N2O4		QEKYKYYTVDQLRQ-VXGBXAGGSA-N	O=C(OC(C)(C)C)NCC(C)(C)CN(C)C1COCC1O
129	4-[2-hydroxyethyl(3-morpholinopropyl)amino]butyric acid ethyl ester	5.0406	-1	-1		C15H30N2O4		OTVDVUABKHMQBW-UHFFFAOYSA-N	O=C(OCC)CCCN(CCO)CCCN1CCOCC1
130	2-[4-hydroxybutyl(3-morpholinopropyl)amino]-2-methyl-propionic acid	5.0402	-1	-1		C15H30N2O4		NTTTZMICLULTHK-UHFFFAOYSA-N	O=C(O)C(N(CCCN1CCOCC1)CCCCO)(C)C
131	4-hydroxy-4-[[(2-methoxy-1-methyl-ethyl)amino]methyl]piperidine-1-carboxylic acid tert-butyl ester	5.0384	-1	-1		C15H30N2O4		FNRNDNIDPOYUNH-UHFFFAOYSA-N	O=C(OC(C)(C)C)N1CCC(O)(CNC(C)COC)CC1
132	2-[2-hydroxyethyl(3-morpholinopropyl)amino]acetic acid butyl ester	5.0382	-1	-1		C15H30N2O4		RRQDLMWJONVNMI-UHFFFAOYSA-N	O=C(OCCCC)CN(CCO)CCCN1CCOCC1
133	4-hydroxy-4-[[2-methoxyethyl(methyl)amino]methyl]piperidine-1-carboxylic acid tert-butyl ester	5.0376	-1	-1		C15H30N2O4		GERBNEBKBLCDDF-UHFFFAOYSA-N	O=C(OC(C)(C)C)N1CCC(O)(CN(C)CCOC)CC1
134	2-[(laurylthio)methyl]acrylic acid;methane	5.0343	-1	-1		C17H34O2S	Branched fatty acids	VKRSSQUAXZYWAL-UHFFFAOYSA-N	O=C(O)C(=C)CSCCCCCCCCCCCC.C
135	2-(heptylthio)capric acid	5.0327	-1	-1		C17H34O2S	Medium-chain fatty acids	DUHJWOOQNBRSDE-UHFFFAOYSA-N	O=C(O)C(SCCCCCCC)CCCCCCCC
136	3-[4-hydroxybutyl(3-morpholinopropyl)amino]butyric acid	5.0307	-1	-1		C15H30N2O4		WSZGQTMNGIIKOV-UHFFFAOYSA-N	O=C(O)CC(N(CCCN1CCOCC1)CCCCO)C
137	2-[(ethylthio)methyl]myristic acid	5.0272	-1	-1		C17H34O2S	Long-chain fatty acids	KFMATXXPZSNKJT-UHFFFAOYSA-N	O=C(O)C(CSCC)CCCCCCCCCCCC
138	2-(mercaptomethyl)palmitic acid	5.0198	-1	-1		C17H34O2S	Long-chain fatty acids	PKIJRHKGKVCWMA-UHFFFAOYSA-N	O=C(O)C(CS)CCCCCCCCCCCCCC
139	4-hydroxy-4-[(3-methoxypropylamino)methyl]piperidine-1-carboxylic acid tert-butyl ester	5.0185	-1	-1		C15H30N2O4		OCJHRMVKKJUJFC-UHFFFAOYSA-N	O=C(OC(C)(C)C)N1CCC(O)(CNCCCOC)CC1
140	4-(3-tert-amyloxy-2-hydroxy-propyl)piperazine-1-carboxylic acid ethyl ester	5.0181	-1	-1		C15H30N2O4		HOJQCTDRAATGDX-UHFFFAOYSA-N	O=C(OCC)N1CCN(CC1)CC(O)COC(C)(C)CC
141	2-(ethylthio)-2-methyl-myristic acid	5.0167	-1	-1		C17H34O2S	Long-chain fatty acids	RSQYBFLRXURBHN-UHFFFAOYSA-N	O=C(O)C(SCC)(C)CCCCCCCCCCCC
142	4-(3-methoxypropylamino)-4-methylol-piperidine-1-carboxylic acid tert-butyl ester	5.0108	-1	-1		C15H30N2O4		YYLHHMUOKDAWNB-UHFFFAOYSA-N	O=C(OC(C)(C)C)N1CCC(NCCCOC)(CO)CC1
143	2-(laurylthio)-3-methyl-butyric acid	5.0036	-1	-1		C17H34O2S	Thia fatty acids	IADYQLBZFCAKJD-UHFFFAOYSA-N	O=C(O)C(SCCCCCCCCCCCC)C(C)C
144	2-[4-hydroxybutyl(3-morpholinopropyl)amino]propionic acid methyl ester	5.0007	-1	-1		C15H30N2O4		DGCVPBCMBULNRM-UHFFFAOYSA-N	O=C(OC)C(N(CCCN1CCOCC1)CCCCO)C
145	2-hydroxypentanethioic acid O-lauryl ester	4.9974	-1	-1		C17H34O2S		JEYGHVMKQNWDLH-UHFFFAOYSA-N	S=C(OCCCCCCCCCCCC)C(O)CCC
146	(2S)-2-(aminomethyl)-4,4-diethoxy-piperidine-1-carboxylic acid tert-butyl ester	4.992	-1	-1		C15H30N2O4	Piperidinecarboxylic acids	KMWBSXFVUCPBFD-LBPRGKRZSA-N	O=C(OC(C)(C)C)N1CCC(OCC)(OCC)CC1CN
147	2-[4-hydroxybutyl(2-morpholinoethyl)amino]acetic acid propyl ester	4.9918	-1	-1		C15H30N2O4		IDHCXBMFPDZIRF-UHFFFAOYSA-N	O=C(OCCC)CN(CCN1CCOCC1)CCCCO
148	6-mercapto-3,3,4,4-tetramethyl-2-(2,2,3-trimethylbutyl)hexanoic acid	4.9887	-1	-1		C17H34O2S	Medium-chain fatty acids	SLKUGBIWIFSZOB-UHFFFAOYSA-N	O=C(O)C(CC(C)(C)C(C)C)C(C)(C)C(C)(C)CCS
149	3-mercaptoheptadecanoic acid	4.9875	-1	-1		C17H34O2S	Long-chain fatty acids	RPEDGUBVPYJAFA-UHFFFAOYSA-N	O=C(O)CC(S)CCCCCCCCCCCCCC
150	2-[4-hydroxybutyl(3-morpholinopropyl)amino]acetic acid ethyl ester	4.9866	-1	-1		C15H30N2O4		XJUOUXOEMYCDCC-UHFFFAOYSA-N	O=C(OCC)CN(CCCN1CCOCC1)CCCCO
151	2-mercaptoheptadecanoic acid	4.9826	-1	-1		C17H34O2S		UCARRIOJGOHKTG-UHFFFAOYSA-N	O=C(O)C(S)CCCCCCCCCCCCCCC
152	3-(ethylthio)pentadecanoic acid	4.981	-1	-1		C17H34O2S	Long-chain fatty acids	SWYMPUIVQZORSY-UHFFFAOYSA-N	O=C(O)CC(SCC)CCCCCCCCCCCC
153	16-mercapto-2-methyl-palmitic acid	4.9809	-1	-1		C17H34O2S	Long-chain fatty acids	SEDASTBPQKLRIS-UHFFFAOYSA-N	O=C(O)C(C)CCCCCCCCCCCCCCS
154	9-(amylthio)lauric acid	4.9809	-1	-1		C17H34O2S	Medium-chain fatty acids	SZMVWDIGZGRYHT-UHFFFAOYSA-N	O=C(O)CCCCCCCC(SCCCCC)CCC
155	2-(laurylthio)valeric acid	4.9784	-1	-1		C17H34O2S	Thia fatty acids	QJWMUNVHNMGHEI-UHFFFAOYSA-N	O=C(O)C(SCCCCCCCCCCCC)CCC
156	3-[3-[2-(2-methoxyethoxy)ethoxy]propyl]-2,2,5,5-tetramethyl-4-imidazolidinone	4.975	-1	-1		C15H30N2O4		LKPXYBAWCDGUJN-UHFFFAOYSA-N	O=C1N(CCCOCCOCCOC)C(NC1(C)C)(C)C
157	10-(1,1-dimethylpentylthio)capric acid	4.9749	-1	-1		C17H34O2S	Medium-chain fatty acids	BLFSYXYOKOLJOY-UHFFFAOYSA-N	O=C(O)CCCCCCCCCSC(C)(C)CCCC
158	2-[(2-amino-2-keto-ethyl)-(3-hydroxypropyl)amino]capric acid	4.9673	-1	-1		C15H30N2O4		QMDWDOLLWPUMRN-UHFFFAOYSA-N	O=C(N)CN(CCCO)C(C(=O)O)CCCCCCCC
159	2-(tridecylthio)butyric acid	4.9572	-1	-1		C17H34O2S		RATOSQNIVXUVSS-UHFFFAOYSA-N	O=C(O)C(SCCCCCCCCCCCCC)CC
160	2-methyl-2-(tridecylthio)propionic acid	4.9567	-1	-1		C17H34O2S		XHJWAJFNCYWKRD-UHFFFAOYSA-N	O=C(O)C(SCCCCCCCCCCCCC)(C)C
161	2-[2-acetamidoethyl(3-hydroxypropyl)amino]caprylic acid	4.9517	-1	-1		C15H30N2O4		JLTXMMGWZYOBCW-UHFFFAOYSA-N	O=C(NCCN(CCCO)C(C(=O)O)CCCCCC)C
162	(2S)-2-(methoxymethoxymethyl)-1-[[2-(methoxymethoxymethyl)pyrrolidino]methyl]pyrrolidine	4.9419	-1	-1		C15H30N2O4	N-alkylpyrrolidines	KCAAXPAGXUXNTG-MLCCFXAWSA-N	O(C)COCC1N(CN2CCCC2COCOC)CCC1
163	3-[3-[(4,4-dimethyloxazolidin-3-yl)methoxy]propoxymethyl]-4,4-dimethyl-oxazolidine	4.9396	-1	-1		C15H30N2O4	Oxazolidines	SYKCQRPPLUHHQX-UHFFFAOYSA-N	O(CN1COCC1(C)C)CCCOCN2COCC2(C)C
164	2-(2-methyltetradecylthio)acetic acid	4.9266	-1	-1		C17H34O2S		MSJIEJNRZKGCCQ-UHFFFAOYSA-N	O=C(O)CSCC(C)CCCCCCCCCCCC
165	2-(myristylthio)propionic acid	4.9258	-1	-1		C17H34O2S	Fatty acids and conjugates	VPJRNEVIRPBAJO-UHFFFAOYSA-N	O=C(O)C(SCCCCCCCCCCCCCC)C
166	2-[2-(laurylthio)ethoxymethyl]oxirane	4.9236	-1	-1		C17H34O2S		YMOPFZIOBAANBA-UHFFFAOYSA-N	O(CCSCCCCCCCCCCCC)CC1OC1
167	N-(2,2-dimethoxyethyl)-2-methyl-N-(3-morpholinopropyl)propionamide	4.9221	-1	-1		C15H30N2O4		ZKYJSQRXQVSDFV-UHFFFAOYSA-N	O=C(N(CCCN1CCOCC1)CC(OC)OC)C(C)C
168	2-(methylthio)myristic acid ethyl ester	4.9214	-1	-1		C17H34O2S	Fatty acid esters	STELIHLJLRHVKF-UHFFFAOYSA-N	O=C(OCC)C(SC)CCCCCCCCCCCC
169	3-[2-(caprylylamino)ethyl-(2-hydroxyethyl)amino]propionic acid	4.9172	-1	-1		C15H30N2O4	N-acyl amines	OKFFNIVTSMRGQI-UHFFFAOYSA-N	O=C(O)CCN(CCO)CCNC(=O)CCCCCCC
170	N-[(1S,2R)-2-hydroxy-1-(isobutylcarbamoyl)pentyl]carbamic acid tert-butyl ester	4.916	-1	-1		C15H30N2O4	Alpha amino acid amides	DTQQERNNRZYAOD-NEPJUHHUSA-N	O=C(OC(C)(C)C)NC(C(=O)NCC(C)C)C(O)CCC
171	N-[(1S,2S)-4-(ethylamino)-2-hydroxy-1-isobutyl-4-keto-butyl]carbamic acid tert-butyl ester	4.9088	-1	-1		C15H30N2O4	Gamma amino acids and derivatives	MUVYJSOACJOAGW-RYUDHWBXSA-N	O=C(OC(C)(C)C)NC(CC(C)C)C(O)CC(=O)NCC
172	N-(2,2-dimethoxyethyl)-N-(3-morpholinopropyl)butyramide	4.907	-1	-1		C15H30N2O4		JBXIYDUHGDVMHM-UHFFFAOYSA-N	O=C(N(CCCN1CCOCC1)CC(OC)OC)CCC
173	3-[5-[hexyl(methyl)amino]pentanoyl-hydroxy-amino]propionic acid	4.9041	-1	-1		C15H30N2O4	Hydroxamic acids	CGDNTKHBSNXGFS-UHFFFAOYSA-N	O=C(O)CCN(O)C(=O)CCCCN(C)CCCCCC
174	2-(2,6,10-trimethyldodecylthio)acetic acid	4.8998	-1	-1		C17H34O2S		PLGBGOKEMPZIAB-UHFFFAOYSA-N	O=C(O)CSCC(C)CCCC(C)CCCC(C)CC
175	N-[(1R,3R)-1-(dimethylcarbamoyl)-3-hydroxy-heptyl]carbamic acid tert-butyl ester	4.8939	-1	-1		C15H30N2O4	Alpha amino acid amides	WTOVCLYEADFACY-VXGBXAGGSA-N	O=C(OC(C)(C)C)NC(C(=O)N(C)C)CC(O)CCCC
176	(E)-7,8-dimethylpentadec-7-ene-1-sulfinic acid	4.8903	-1	-1		C17H34O2S	Sulfinic acids	MTJJPCXBVOCGSL-WUKNDPDISA-N	O=S(O)CCCCCCC(=C(C)CCCCCCC)C
177	2-amino-6-(octoxycarbonylamino)hexanoic acid	4.8902	-1	-1		C15H30N2O4	Alpha amino acids	ARYQWVKPOYFAII-UHFFFAOYSA-N	O=C(OCCCCCCCC)NCCCCC(N)C(=O)O
178	(3R,4R)-3-hydroxy-4-(3-isopropoxypropylamino)pyrrolidine-1-carboxylic acid tert-butyl ester	4.8838	-1	-1		C15H30N2O4		HKQZSEARZQNAFN-CHWSQXEVSA-N	O=C(OC(C)(C)C)N1CC(O)C(NCCCOC(C)C)C1
179	(2R)-N-[4-(amylamino)-4-keto-butyl]-2,4-dihydroxy-3,3-dimethyl-butyramide	4.8786	-1	-1		C15H30N2O4	Gamma amino acids and derivatives	WLPBWIFCQQFDPO-ZDUSSCGKSA-N	O=C(NCCCCC)CCCNC(=O)C(O)C(C)(C)CO
180	9-(octylthio)pelargonic acid	4.8763	-1	-1		C17H34O2S	Medium-chain fatty acids	OMIBNTWPNMKIGZ-UHFFFAOYSA-N	O=C(O)CCCCCCCCSCCCCCCCC
181	2-[methyl(myristyl)sulfonio]acetate	4.8734	-1	-1		C17H34O2S	Carboxylic acid salts	NVZCDMSIKOJODZ-UHFFFAOYSA-N	O=C([O-])C[S+](C)CCCCCCCCCCCCCC
182	2,2-diethyl-4-(methylthio)hexanoic acid (1-ethyl-1-methyl-propyl) ester	4.8695	-1	-1		C17H34O2S		UZLYAWOQJGADEL-UHFFFAOYSA-N	O=C(OC(C)(CC)CC)C(CC)(CC)CC(SC)CC
183	8-(nonylthio)caprylic acid	4.8618	-1	-1		C17H34O2S	Medium-chain fatty acids	IYDVFMFKIKZKEK-UHFFFAOYSA-N	O=C(O)CCCCCCCSCCCCCCCCC
184	[4-[3-[ethyl(2-hydroxyethyl)amino]propoxy]cyclohexyl]-methyl-carbamic acid	4.8615	-1	-1		C15H30N2O4	Carbamic acids	NFDQYIJHEUFQHP-UHFFFAOYSA-N	O=C(O)N(C)C1CCC(OCCCN(CC)CCO)CC1
185	5-(laurylthio)valeric acid	4.8576	-1	-1		C17H34O2S	Thia fatty acids	AMRGJAKITYQKSG-UHFFFAOYSA-N	O=C(O)CCCCSCCCCCCCCCCCC
186	8-(octylthio)caprylic acid methyl ester	4.854	-1	-1		C17H34O2S	Fatty acid methyl esters	FVJQSDPLIZYYFV-UHFFFAOYSA-N	O=C(OC)CCCCCCCSCCCCCCCC
187	10-(heptylthio)capric acid	4.8513	-1	-1		C17H34O2S	Medium-chain fatty acids	TUFQWJKPRHKEDC-UHFFFAOYSA-N	O=C(O)CCCCCCCCCSCCCCCCC
188	(4R)-8-amino-4-(tert-butoxycarbonylamino)caprylic acid ethyl ester	4.8509	-1	-1		C15H30N2O4	Gamma amino acids and derivatives	FXMJQAMGNOQWMB-GFCCVEGCSA-N	O=C(OC(C)(C)C)NC(CCC(=O)OCC)CCCCN
189	12-(butylthio)lauric acid methyl ester	4.8479	-1	-1		C17H34O2S	Fatty acid methyl esters	QQJRRHYNVRJKKT-UHFFFAOYSA-N	O=C(OC)CCCCCCCCCCCSCCCC
190	7-(decylthio)enanthic acid	4.8442	-1	-1		C17H34O2S	Medium-chain fatty acids	CAUZUIDOYVMXOB-UHFFFAOYSA-N	O=C(O)CCCCCCSCCCCCCCCCC
191	4-(laurylthio)butyric acid methyl ester	4.8388	-1	-1		C17H34O2S	Fatty acid methyl esters	DAKFVUCMZUAKBP-UHFFFAOYSA-N	O=C(OC)CCCSCCCCCCCCCCCC
192	16-mercaptoheptadecanoic acid	4.8385	-1	-1		C17H34O2S	Long-chain fatty acids	GSCQYNCAHYITJO-UHFFFAOYSA-N	O=C(O)CCCCCCCCCCCCCCC(S)C
193	4-(tridecylthio)butyric acid	4.8382	-1	-1		C17H34O2S		DZDFPOSPYAYXNF-UHFFFAOYSA-N	O=C(O)CCCSCCCCCCCCCCCCC
194	2-(6-hydroxyhexylamino)-4-keto-4-(sec-butylamino)butyric acid methyl ester	4.8368	-1	-1		C15H30N2O4	Asparagine and derivatives	XGTFOPPFZXKAEG-UHFFFAOYSA-N	O=C(NC(C)CC)CC(NCCCCCCO)C(=O)OC
195	(2S)-2-(hexylthio)capric acid methyl ester	4.8351	-1	-1		C17H34O2S	Fatty acid esters	CEHVFRZJYSTLIN-INIZCTEOSA-N	O=C(OC)C(SCCCCCC)CCCCCCCC
196	propionic acid 2-(laurylthio)ethyl ester	4.8345	-1	-1		C17H34O2S	Carboxylic acid esters	UJPRMBJYQKFBBK-UHFFFAOYSA-N	O=C(OCCSCCCCCCCCCCCC)CC
197	3-(laurylthio)butyric acid methyl ester	4.833	-1	-1		C17H34O2S	Fatty acid methyl esters	MNRGGIAFYBFUKT-UHFFFAOYSA-N	O=C(OC)CC(SCCCCCCCCCCCC)C
198	3-(laurylthio)-2-methyl-propionic acid methyl ester	4.833	-1	-1		C17H34O2S	Methyl esters	ZMSIPKAIEUNIPB-UHFFFAOYSA-N	O=C(OC)C(C)CSCCCCCCCCCCCC
199	11-(hexylthio)undecanoic acid	4.8265	-1	-1		C17H34O2S	Medium-chain fatty acids	JTIMBAFQIQXLAR-UHFFFAOYSA-N	O=C(O)CCCCCCCCCCSCCCCCC
200	12-(amylthio)lauric acid	4.8263	-1	-1		C17H34O2S	Medium-chain fatty acids	IUGWXZMAQFHIOA-UHFFFAOYSA-N	O=C(O)CCCCCCCCCCCSCCCCC
201	4-(1,1-dimethyldecylthio)butyric acid methyl ester	4.8234	-1	-1		C17H34O2S		SDWPZIXQGMFJAX-UHFFFAOYSA-N	O=C(OC)CCCSC(C)(C)CCCCCCCCC
202	3-[5-[amyl(methyl)amino]pentanoyl-hydroxy-amino]propionic acid methyl ester	4.8227	-1	-1		C15H30N2O4	Methyl esters	LDNDMOZSSKLUQI-UHFFFAOYSA-N	O=C(OC)CCN(O)C(=O)CCCCN(C)CCCCC
203	N-[2-[2-[2-(2-aminopropoxy)propoxy]propoxy]-1-methyl-ethyl]acrylamide	4.8221	-1	-1		C15H30N2O4	Acrylic acids and derivatives	VGVWZWPOTBIODP-UHFFFAOYSA-N	O=C(C=C)NC(C)COCC(OCC(OCC(N)C)C)C
204	3-(1,1-dimethyldecylthio)propionic acid ethyl ester	4.822	-1	-1		C17H34O2S	Carboxylic acid esters	PMTQNFGXWIAKRS-UHFFFAOYSA-N	O=C(OCC)CCSC(C)(C)CCCCCCCCC
205	(2R)-2-hydroxy-N-[3-keto-3-(5-methoxypentylamino)propyl]-3,3-dimethyl-butyramide	4.8218	-1	-1		C15H30N2O4		NABPYAZEODOCAF-ZDUSSCGKSA-N	O=C(NCCCCCOC)CCNC(=O)C(O)C(C)(C)C
206	N-[2-[2,2-diethoxyethyl(tetrahydrofurfuryl)amino]ethyl]acetamide	4.8186	-1	-1		C15H30N2O4		KPVASHJFWPFHME-UHFFFAOYSA-N	O=C(NCCN(CC(OCC)OCC)CC1OCCC1)C
207	2,2-dimethylpropionic acid 11-(methylthio)undecyl ester	4.8121	-1	-1		C17H34O2S		IVRWLROMEXAMIS-UHFFFAOYSA-N	O=C(OCCCCCCCCCCCSC)C(C)(C)C
208	3-(laurylthio)propionic acid ethyl ester	4.81	-1	-1		C17H34O2S	Carboxylic acid esters	RAILELPCCPIZFG-UHFFFAOYSA-N	O=C(OCC)CCSCCCCCCCCCCCC
209	14-(propylthio)myristic acid	4.8065	-1	-1		C17H34O2S	Long-chain fatty acids	VLEYJAQGCNFJMS-UHFFFAOYSA-N	O=C(O)CCCCCCCCCCCCCSCCC
210	N-[3-[(2-hydroxy-4-methyl-pentyl)amino]-3-keto-2-methyl-propyl]carbamic acid tert-butyl ester	4.8032	-1	-1		C15H30N2O4		OSFAABBDEVZPJK-UHFFFAOYSA-N	O=C(OC(C)(C)C)NCC(C(=O)NCC(O)CC(C)C)C
211	lauric acid (3-mercapto-3-methyl-butyl) ester	4.8013	-1	-1		C17H34O2S	Fatty acid esters	WUIHIVJGQGIMMG-UHFFFAOYSA-N	O=C(OCCC(S)(C)C)CCCCCCCCCCC
212	propionic acid [1-(1-ethylbutylthio)-6-methyl-heptyl] ester	4.7981	-1	-1		C17H34O2S	Monothioacetals	UNOFQFPIHOHYSS-UHFFFAOYSA-N	O=C(OC(SC(CC)CCC)CCCCC(C)C)CC
213	1-[2,2-diethoxyethyl(2-morpholinoethyl)amino]acetone	4.7967	-1	-1		C15H30N2O4		QOJHEAZESUFUDQ-UHFFFAOYSA-N	O=C(C)CN(CCN1CCOCC1)CC(OCC)OCC
214	3-[7-[butyl(methyl)amino]heptanoyl-hydroxy-amino]propionic acid	4.7949	-1	-1		C15H30N2O4	Hydroxamic acids	ALWLHHBHWPKNSP-UHFFFAOYSA-N	O=C(O)CCN(O)C(=O)CCCCCCN(C)CCCC
215	16-mercaptopalmitic acid methyl ester	4.7927	-1	-1		C17H34O2S	Fatty acid methyl esters	QRSZRBGLKUGJGQ-UHFFFAOYSA-N	O=C(OC)CCCCCCCCCCCCCCCS
216	15-mercaptopalmitic acid methyl ester	4.7909	-1	-1		C17H34O2S	Fatty acid methyl esters	GDRWSMMSFVSNFV-UHFFFAOYSA-N	O=C(OC)CCCCCCCCCCCCCC(S)C
217	3-(tridecylthio)propionic acid methyl ester	4.7861	-1	-1		C17H34O2S	Methyl esters	NLICBPVPRNKZII-UHFFFAOYSA-N	O=C(OC)CCSCCCCCCCCCCCCC
218	3-[(3-butyl-3-methyl-nonyl)thio]propionic acid	4.7859	-1	-1		C17H34O2S		LBFYWGXRXXKTDO-UHFFFAOYSA-N	O=C(O)CCSCCC(C)(CCCC)CCCCCC
219	2-mercapto-2-methyl-butyric acid lauryl ester	4.7853	-1	-1		C17H34O2S		VJIVTCVSBPULEO-UHFFFAOYSA-N	O=C(OCCCCCCCCCCCC)C(S)(C)CC
220	N-[(1S)-1-[(3-hydroxy-2,2-dimethyl-propyl)carbamoyl]-2-methyl-propyl]carbamic acid tert-butyl ester	4.7793	-1	-1		C15H30N2O4	Valine and derivatives	JSHPTBSAEVJXMW-NSHDSACASA-N	O=C(OC(C)(C)C)NC(C(=O)NCC(C)(C)CO)C(C)C
221	17-mercaptoheptadecanoic acid	4.7736	-1	-1		C17H34O2S	Long-chain fatty acids	APIDLHSNPUNEAS-UHFFFAOYSA-N	O=C(O)CCCCCCCCCCCCCCCCS
222	2-(pentadecylthio)acetic acid	4.7728	-1	-1		C17H34O2S	Straight chain fatty acids	URWRXGNLYMBUSA-UHFFFAOYSA-N	O=C(O)CSCCCCCCCCCCCCCCC
223	4-(tert-butylthio)-2-isopropyl-2,3,3,4-tetramethyl-valeric acid methyl ester	4.7623	-1	-1		C17H34O2S		GEXAULWGGBWLFW-UHFFFAOYSA-N	O=C(OC)C(C)(C(C)C)C(C)(C)C(SC(C)(C)C)(C)C
224	(2S)-3-tert-butoxy-2-(morpholinoamino)propionic acid tert-butyl ester	4.7573	-1	-1		C15H30N2O4		DXAYCGNQJGOEEC-LBPRGKRZSA-N	O=C(OC(C)(C)C)C(NN1CCOCC1)COC(C)(C)C
225	propionic acid [3-(hexylthio)-6-methyl-heptyl] ester	4.7512	-1	-1		C17H34O2S	Carboxylic acid esters	CVUWPKOTLCHCLB-UHFFFAOYSA-N	O=C(OCCC(SCCCCCC)CCC(C)C)CC
226	3-mercaptopropionic acid 1,1-dimethyldodecyl ester	4.7501	-1	-1		C17H34O2S	Carboxylic acid esters	CMWYVDDLUQZVCV-UHFFFAOYSA-N	O=C(OC(C)(C)CCCCCCCCCCC)CCS
227	2-(methylthio)butyric acid lauryl ester	4.7461	-1	-1		C17H34O2S	Fatty acid esters	UFUZJSBUIKUTBG-UHFFFAOYSA-N	O=C(OCCCCCCCCCCCC)C(SC)CC
228	N-[3-(2,2-dimethoxyethylamino)-2,2-dimethyl-cyclobutyl]carbamic acid tert-butyl ester	4.7438	-1	-1		C15H30N2O4		AGOIHGNDSMBMBP-UHFFFAOYSA-N	O=C(OC(C)(C)C)NC1CC(NCC(OC)OC)C1(C)C
229	N-(2,2-diethoxyethyl)-N-(3-morpholinopropyl)acetamide	4.7413	-1	-1		C15H30N2O4		PDCMTEFASDYGEZ-UHFFFAOYSA-N	O=C(N(CCCN1CCOCC1)CC(OCC)OCC)C
230	2-(2-ethoxyethoxy)-N-[2-(4-methoxypiperidino)ethyl]propionamide	4.7318	-1	-1		C15H30N2O4	Piperidines	NYSNLJVTRFVPLA-UHFFFAOYSA-N	O=C(NCCN1CCC(OC)CC1)C(OCCOCC)C
231	enanthic acid 10-mercaptodecyl ester	4.7303	-1	-1		C17H34O2S	Fatty acid esters	QNDFPIKZBZXCRH-UHFFFAOYSA-N	O=C(OCCCCCCCCCCS)CCCCCC
232	3-mercaptobutyric acid tridecyl ester	4.729	-1	-1		C17H34O2S		UYFSXYSQRXMNMQ-UHFFFAOYSA-N	O=C(OCCCCCCCCCCCCC)CC(S)C
233	3-mercaptovaleric acid lauryl ester	4.7243	-1	-1		C17H34O2S	Fatty acid esters	JEVZBIGPHZPBKH-UHFFFAOYSA-N	O=C(OCCCCCCCCCCCC)CC(S)CC
234	myristic acid 3-mercaptopropyl ester	4.7183	-1	-1		C17H34O2S	Fatty acid esters	QACUQOAHRRYPGX-UHFFFAOYSA-N	O=C(OCCCS)CCCCCCCCCCCCC
235	heptadec-2-ene-1-sulfinic acid	4.7171	-1	-1		C17H34O2S	Sulfinic acids	PWZMDOGQCVOYFZ-UHFFFAOYSA-N	O=S(O)CC=CCCCCCCCCCCCCCC
236	heptadec-1-ene-1-sulfinic acid	4.7171	-1	-1		C17H34O2S		DXAFWUDXQWZASG-UHFFFAOYSA-N	O=S(O)C=CCCCCCCCCCCCCCCC
237	N-[(1S)-1-[2-(3-aminopropoxy)acetyl]-3-methyl-butyl]carbamic acid tert-butyl ester	4.7145	-1	-1		C15H30N2O4		KQIDNPDAXMMVCP-LBPRGKRZSA-N	O=C(OC(C)(C)C)NC(C(=O)COCCCN)CC(C)C
238	propionic acid (myristylthio) ester	4.7105	-1	-1		C17H34O2S	Organic thioperoxides	QHJVRJQPMUXVDB-UHFFFAOYSA-N	O=C(OSCCCCCCCCCCCCCC)CC
239	cyclohexadecylmethanesulfinic acid	4.7105	-1	-1		C17H34O2S		RGPUSUHBAHTBHK-UHFFFAOYSA-N	O=S(O)CC1CCCCCCCCCCCCCCC1
240	[2-(diethylcarbamoyloxymethyl)-2-methyl-pentyl]-ethyl-carbamic acid	4.7103	-1	-1		C15H30N2O4		JNOKEPZOXZKFMG-UHFFFAOYSA-N	O=C(O)N(CC)CC(C)(COC(=O)N(CC)CC)CCC
241	3-[tert-butoxycarbonyl-[3-(diethylamino)propyl]amino]propionic acid	4.7093	-1	-1		C15H30N2O4		MEFCUUJMGFGMHZ-UHFFFAOYSA-N	O=C(OC(C)(C)C)N(CCC(=O)O)CCCN(CC)CC
242	3-[2,2-dimethoxyethyl(ethyl)amino]pyrrolidine-1-carboxylic acid tert-butyl ester	4.7087	-1	-1		C15H30N2O4		YRENZJVPGOJHCJ-UHFFFAOYSA-N	O=C(OC(C)(C)C)N1CCC(N(CC)CC(OC)OC)C1
243	(cetylthio)formic acid	4.7087	-1	-1		C17H34O2S	Organic thiocarbonic acid derivatives	WOCMGZKVEYUPFP-UHFFFAOYSA-N	O=C(O)SCCCCCCCCCCCCCCCC
244	2-mercaptopropionic acid myristyl ester	4.7063	-1	-1		C17H34O2S	Carboxylic acid esters	ODMDXJLXJGCANS-UHFFFAOYSA-N	O=C(OCCCCCCCCCCCCCC)C(S)C
245	3-[2-aminoethyl-(2-tert-butoxy-2-keto-ethyl)amino]propionic acid tert-butyl ester	4.7029	-1	-1		C15H30N2O4	Alpha amino acid esters	ASSHOHPPZWOQJA-UHFFFAOYSA-N	O=C(OC(C)(C)C)CN(CCN)CCC(=O)OC(C)(C)C
246	2-(ethylthio)propionic acid lauryl ester	4.6997	-1	-1		C17H34O2S		OSRYDBWOOVHYRU-UHFFFAOYSA-N	O=C(OCCCCCCCCCCCC)C(SCC)C
247	8-mercaptocaprylic acid nonyl ester	4.6945	-1	-1		C17H34O2S	Fatty acid esters	MORQMDIVPIBIEI-UHFFFAOYSA-N	O=C(OCCCCCCCCC)CCCCCCCS
248	3-(ethylthio)propionic acid lauryl ester	4.6901	-1	-1		C17H34O2S		BVZFMJGYUIWFPK-UHFFFAOYSA-N	O=C(OCCCCCCCCCCCC)CCSCC
249	2-(laurylcarbamoylamino)oxyacetic acid	4.6885	-1	-1		C15H30N2O4	Carboxylic acids	KYOPKJUMPGWSKR-UHFFFAOYSA-N	O=C(NOCC(=O)O)NCCCCCCCCCCCC
250	(2S,3S)-3-amino-2-(2-hydroxypentanoylamino)-4-methyl-valeric acid tert-butyl ester	4.6827	-1	-1		C15H30N2O4	Leucine and derivatives	NXRWITZGAHDEAW-RAMGSTBQSA-N	O=C(OC(C)(C)C)C(NC(=O)C(O)CCC)C(N)C(C)C
251	4-(2,2-diethoxyethyl)piperazine-1-carboxylic acid tert-butyl ester	4.6568	-1	-1		C15H30N2O4		WQSRVDURUIGJIR-UHFFFAOYSA-N	O=C(OC(C)(C)C)N1CCN(CC1)CC(OCC)OCC
252	5-hydroxy-N-[3-(5-hydroxyhexanoylamino)propyl]hexanamide	4.6384	-1	-1		C15H30N2O4	N-acyl amines	HOAPGJOGRLYWQO-UHFFFAOYSA-N	O=C(NCCCNC(=O)CCCC(O)C)CCCC(O)C
253	3-[10-(dimethylamino)decanoyl-hydroxy-amino]propionic acid	4.6347	-1	-1		C15H30N2O4	Hydroxamic acids	DVNBGNMELYLFAD-UHFFFAOYSA-N	O=C(O)CCN(O)C(=O)CCCCCCCCCN(C)C
254	(2S)-2-(3-butoxypropylcarbamoylamino)-3-methyl-valeric acid methyl ester	4.6329	-1	-1		C15H30N2O4	Isoleucine and derivatives	XAHJMFMRXKERND-ABLWVSNPSA-N	O=C(NCCCOCCCC)NC(C(=O)OC)C(C)CC
255	3-[9-(dimethylamino)nonanoyl-hydroxy-amino]propionic acid methyl ester	4.6264	-1	-1		C15H30N2O4	Methyl esters	KDYRPQNFCURCQB-UHFFFAOYSA-N	O=C(OC)CCN(O)C(=O)CCCCCCCCN(C)C
256	3-mercaptopropionic acid myristyl ester	4.6201	-1	-1		C17H34O2S	Carboxylic acid esters	ZFPOOXOHYITZFO-UHFFFAOYSA-N	O=C(OCCCCCCCCCCCCCC)CCS
257	6-hydroxy-N-[2-(6-hydroxyhexanoylamino)propyl]hexanamide	4.62	-1	-1		C15H30N2O4	N-acyl amines	BVDDAGNWXBYGHQ-UHFFFAOYSA-N	O=C(NCC(NC(=O)CCCCCO)C)CCCCCO
258	N-[(1S)-1-(3-methoxypropylcarbamoyl)-3-methyl-butyl]carbamic acid tert-butyl ester	4.617	-1	-1		C15H30N2O4		OJBQGACDUSGGDC-LBPRGKRZSA-N	O=C(OC(C)(C)C)NC(C(=O)NCCCOC)CC(C)C
259	(2S)-2-amino-6-(tert-butoxycarbonylamino)hexanoic acid tert-butyl ester	4.613	-1	-1		C15H30N2O4	Alpha amino acid esters	XFQQITUYUVFREJ-NSHDSACASA-N	O=C(OC(C)(C)C)NCCCCC(N)C(=O)OC(C)(C)C
260	(2S)-6-amino-2-(tert-butoxycarbonylamino)hexanoic acid tert-butyl ester	4.6107	-1	-1		C15H30N2O4	Alpha amino acid esters	LVUBESNUUMLEHL-NSHDSACASA-N	O=C(OC(C)(C)C)NC(C(=O)OC(C)(C)C)CCCCN
261	bis(2-ethylhexoxy)methanethione	4.609	-1	-1		C17H34O2S	Thiocarbonic acid diesters	XVERXSUDLXLTGY-UHFFFAOYSA-N	S=C(OCC(CC)CCCC)OCC(CC)CCCC
262	2-mercaptoacetic acid pentadecyl ester	4.5888	-1	-1		C17H34O2S	Carboxylic acid esters	TWAZMGRHTQUCGT-UHFFFAOYSA-N	O=C(OCCCCCCCCCCCCCCC)CS
263	(octylthio)formic acid octyl ester	4.5645	-1	-1		C17H34O2S	Monothioacetals	QTXOHMCQMZBQMI-UHFFFAOYSA-N	O=C(OCCCCCCCC)SCCCCCCCC
264	methanethioic acid S-(16-hydroxyhexadecyl) ester	4.5639	-1	-1		C17H34O2S	Thioesters	COZAPVPGYQSYQO-UHFFFAOYSA-N	O=CSCCCCCCCCCCCCCCCCO
265	N-(3-carbamoyloxypropyl)carbamic acid decyl ester	4.5398	-1	-1		C15H30N2O4	Carbamate esters	DQPUUKNDXKAKRD-UHFFFAOYSA-N	O=C(OCCCNC(=O)OCCCCCCCCCC)N
266	(2S)-2-amino-4-methyl-valeric acid 3-[(2S)-2-amino-4-methyl-pentanoyl]oxypropyl ester	4.5243	-1	-1		C15H30N2O4		WTQQWEBXMNGHII-STQMWFEESA-N	O=C(OCCCOC(=O)C(N)CC(C)C)C(N)CC(C)C
267	(2S)-2-aminohexanoic acid 3-[(2S)-2-aminohexanoyl]oxypropyl ester	4.5212	-1	-1		C15H30N2O4		PVRPFURVXDFRTL-STQMWFEESA-N	O=C(OCCCOC(=O)C(N)CCCC)C(N)CCCC
268	N-[6-(butoxycarbonylamino)hexyl]carbamic acid isopropyl ester	4.5047	-1	-1		C15H30N2O4	Carbamate esters	KZZZMGYKNXOAJH-UHFFFAOYSA-N	O=C(OCCCC)NCCCCCCNC(=O)OC(C)C
269	4-(tert-butoxycarbonylamino)-3-(diethylamino)valeric acid methyl ester	4.5047	-1	-1		C15H30N2O4	Fatty acid methyl esters	GUHMHOXKVJFYNI-UHFFFAOYSA-N	O=C(OC(C)(C)C)NC(C)C(N(CC)CC)CC(=O)OC
270	1-[(S)-methylsulfinyl]hexadecan-2-one	4.498	-1	-1		C17H34O2S		RYFMWQKJEOPGBO-FQEVSTJZSA-N	O=C(CS(=O)C)CCCCCCCCCCCCCC
271	(2S)-2-(tert-butoxycarbonylamino)-4-(dimethylamino)butyric acid isobutyl ester	4.4951	-1	-1		C15H30N2O4	Alpha amino acid esters	ZTVXZGLKOUTMLO-LBPRGKRZSA-N	O=C(OC(C)(C)C)NC(C(=O)OCC(C)C)CCN(C)C
272	(2S,3S)-2-amino-3-methyl-valeric acid 3-[(2S,3S)-2-amino-3-methyl-pentanoyl]oxypropyl ester	4.4949	-1	-1		C15H30N2O4		OTWYJPDHRMNHSO-CYDGBPFRSA-N	O=C(OCCCOC(=O)C(N)C(C)CC)C(N)C(C)CC
273	2-[(tert-butoxycarbonylamino)-isobutyl-amino]acetic acid tert-butyl ester	4.4864	-1	-1		C15H30N2O4	Alpha amino acid esters	AZOUCECIHMRXFG-UHFFFAOYSA-N	O=C(OC(C)(C)C)NN(CC(=O)OC(C)(C)C)CC(C)C
274	1-propyloctylsulfonylcyclohexane	4.4859	-1	-1		C17H34O2S		XAPLAYGFCGDUKK-UHFFFAOYSA-N	O=S(=O)(C(CCC)CCCCCCC)C1CCCCC1
275	1,3-bis(2,2-diethoxyethyl)-4-imidazoline	4.4834	-1	-1		C15H30N2O4	Imidazolines	OCIWYWUXAZTJNU-UHFFFAOYSA-N	O(CC)C(OCC)CN1C=CN(C1)CC(OCC)OCC
276	2,3-bis(tert-butylamino)succinic acid O1-ethyl ester O4-methyl ester	4.4815	-1	-1		C15H30N2O4	Aspartic acid and derivatives	WMXKFDXDBWUWEC-UHFFFAOYSA-N	O=C(OC)C(NC(C)(C)C)C(NC(C)(C)C)C(=O)OCC
277	N,N-dimethylcarbamic acid [2-(isobutylcarbamoyloxymethyl)-2-methyl-pentyl] ester	4.4803	-1	-1		C15H30N2O4		NKIJDWIHUKJRGW-UHFFFAOYSA-N	O=C(OCC(C)(COC(=O)N(C)C)CCC)NCC(C)C
278	1-hexyloctylsulfonylcyclopropane	4.478	-1	-1		C17H34O2S		XFHTWBGHBIPOSU-UHFFFAOYSA-N	O=S(=O)(C(CCCCCC)CCCCCCC)C1CC1
279	N-[5-(butoxycarbonylamino)pentyl]carbamic acid butyl ester	4.4719	-1	-1		C15H30N2O4	Carbamate esters	BCGATMUFNGVJDF-UHFFFAOYSA-N	O=C(OCCCC)NCCCCCNC(=O)OCCCC
280	N-[5-(isobutoxycarbonylamino)pentyl]carbamic acid isobutyl ester	4.4673	-1	-1		C15H30N2O4	Carbamate esters	HTMCZNJVDGUXJL-UHFFFAOYSA-N	O=C(OCC(C)C)NCCCCCNC(=O)OCC(C)C
281	2-(tert-butoxycarbonylamino)-3-(isopropylamino)propionic acid tert-butyl ester	4.4647	-1	-1		C15H30N2O4		CVJJOTRHMSKLRF-UHFFFAOYSA-N	O=C(OC(C)(C)C)NC(C(=O)OC(C)(C)C)CNC(C)C
282	3-[2-[(2-tert-butoxy-2-keto-ethyl)amino]ethylamino]propionic acid tert-butyl ester	4.4562	-1	-1		C15H30N2O4	Alpha amino acid esters	FMHCFABSJRWKMC-UHFFFAOYSA-N	O=C(OC(C)(C)C)CNCCNCCC(=O)OC(C)(C)C
283	N-(3-butoxypropyl)-2-[2-(diethylamino)-2-keto-ethoxy]acetamide	4.454	-1	-1		C15H30N2O4	Tertiary carboxylic acid amides	JFHAELDTDNRGFZ-UHFFFAOYSA-N	O=C(NCCCOCCCC)COCC(=O)N(CC)CC
284	(2S)-2-[3-[[(1S)-1-carbomethoxy-2-methyl-propyl]amino]propylamino]-3-methyl-butyric acid methyl ester	4.4517	-1	-1		C15H30N2O4	Alpha amino acid esters	XBAIMZRABYRZNB-STQMWFEESA-N	O=C(OC)C(NCCCNC(C(=O)OC)C(C)C)C(C)C
285	N-butylcarbamic acid 5-(butylcarbamoyloxy)pentyl ester	4.4215	-1	-1		C15H30N2O4	Carbamate esters	KPRNYCNRYOORES-UHFFFAOYSA-N	O=C(OCCCCCOC(=O)NCCCC)NCCCC
286	malonic acid bis(1-aminohexyl) ester	4.4199	-1	-1		C15H30N2O4	Dicarboxylic acids and derivatives	XWVPULSHIKLHRJ-UHFFFAOYSA-N	O=C(OC(N)CCCCC)CC(=O)OC(N)CCCCC
287	4-(1-butyloctyl)thiane 1,1-dioxide	4.4166	-1	-1		C17H34O2S		PABQSTQUYGLUDS-UHFFFAOYSA-N	O=S1(=O)CCC(CC1)C(CCCC)CCCCCCC
288	(Z)-16-mesylhexadec-5-ene	4.3968	-1	-1		C17H34O2S	Sulfones	NWEMDEWKMYDZGT-SREVYHEPSA-N	O=S(=O)(C)CCCCCCCCCCC=CCCCC
289	N-isopropylcarbamic acid [2-(isopropylcarbamoyloxymethyl)-2-methyl-pentyl] ester	4.3903	-1	-1		C15H30N2O4	Carbamate esters	DXXSFIAPOIOUMX-UHFFFAOYSA-N	O=C(OCC(C)(COC(=O)NC(C)C)CCC)NC(C)C
290	3-(1-amylheptyl)-3-methyl-sulfolane	4.3902	-1	-1		C17H34O2S		UXNXPQNAYPYFSY-UHFFFAOYSA-N	O=S1(=O)CCC(C)(C1)C(CCCCC)CCCCCC
291	5-hydroxy-N-[5-(5-hydroxypentanoylamino)pentyl]valeramide	4.3695	-1	-1		C15H30N2O4	N-acyl amines	SHVPVZOKQSGUID-UHFFFAOYSA-N	O=C(NCCCCCNC(=O)CCCCO)CCCCO
292	1-pent-4-enylsulfonyldodecane	4.3675	-1	-1		C17H34O2S	Sulfones	GFSZYRSAKVGAMH-UHFFFAOYSA-N	O=S(=O)(CCCC=C)CCCCCCCCCCCC
293	mesylcyclohexadecane	4.346	-1	-1		C17H34O2S		YPSNOHCCFRMWCV-UHFFFAOYSA-N	O=S(=O)(C)C1CCCCCCCCCCCCCCC1
294	1-mesylhexadec-1-ene	4.3398	-1	-1		C17H34O2S	Sulfones	ZLOVBOGRNNAJAI-UHFFFAOYSA-N	O=S(=O)(C=CCCCCCCCCCCCCCC)C
295	4-hydroxy-N-[7-(4-hydroxybutanoylamino)heptyl]butyramide	4.308	-1	-1		C15H30N2O4	N-acyl amines	UJGZHBPXXIZYLG-UHFFFAOYSA-N	O=C(NCCCCCCCNC(=O)CCCO)CCCO
296	N-[11-(carbomethoxyamino)undecyl]carbamic acid methyl ester	4.2275	-1	-1		C15H30N2O4	Methylcarbamates	LIQZQASOYLUZOU-UHFFFAOYSA-N	O=C(OC)NCCCCCCCCCCCNC(=O)OC
297	ethane;2-(2-mercaptoethyl)benzoic acid	4.1627	-1	-1		C17H34O2S	Benzoic acids	LVQONWNBPMAXFY-UHFFFAOYSA-N	O=C(O)C=1C=CC=CC1CCS.CC.CC.CC.CC
298	1-sulfonylheptadecane	4.1067	-1	-1		C17H34O2S		NMMQCGMYRYGLTJ-UHFFFAOYSA-N	O=[SH3](=O)=CCCCCCCCCCCCCCCCC
299	5-butyl-2-thenoic acid;ethane;isobutane	4.021	-1	-1		C17H34O2S		BWWOMHZYAXFNAY-UHFFFAOYSA-N	O=C(O)C=1SC(=CC1)CCCC.CC.CC.CC(C)C

## Sheet: Compound 3
File path: C:\Users\yilu\Downloads\Data from laptop\Software_Yi\MSFINDER ver 3.50\MSDIAL_TEMP\2020_7_14_125_LBORN0244_BB4_01_22435_213_9.5_279.23.mat
File name: 2020_7_14_125_LBORN0244_BB4_01_22435_213_9.5_279.23
Title: Unknown
MS1 count: 5236
MSMS count: 93
PRECURSORMZ: 279.2318
PRECURSORTYPE: [M+H]+
Intensity: -1
Retention time: 9.50135
Retention index: 0
Rank	Formula	Mass	Mass error	Score	Resources
1	C18H30O2	278.225	5.67e-05	4.495	HMDB,KNApSAcK,ChEBI,DrugBank,SMPDB,T3DB,FooDB,NANPDB,STOFF,BMDB,LipidMAPS,Urine,Saliva,Feces,ECMDB,Serum,PubChem,PlantCyc,UNPD,BLEXP,MINE
2	C13H30N2O4	278.221	-0.0039661	3.443
3	C8H26N10O	278.229	0.0045819	3.326
4	C12H30N4O3	278.232	0.0072673	3.287
5	C9H26N8O2	278.218	-0.0066515	3.281
6	C11H30N6S	278.225	0.0007424	3.272
7	C15H34O2S	278.228	0.0034278	3.262
8	C14H26N6	278.222	-0.0026287	3.208
File path: C:\Users\yilu\Downloads\Data from laptop\Software_Yi\MSFINDER ver 3.50\MSDIAL_TEMP\2020_7_14_125_LBORN0244_BB4_01_22435_213_9.5_279.23.mat
File name: 2020_7_14_125_LBORN0244_BB4_01_22435_213_9.5_279.23
Title: Unknown
MS1 count: 5236
MSMS count: 93
PRECURSORMZ: 279.2318
PRECURSORTYPE: [M+H]+
Intensity: -1
Retention time: 9.50135
Retention index: 0
Rank	Title	Score	Retention time	Retention index	Resources	Formula	Ontology	InChIKey	SMILES
1	(9Z,12Z,15Z)-octadeca-9,12,15-trienoic acid	8.2663	-1	-1	HMDB=HMDB0001388;HMDB0030964,ChEBI=CHEBI:27432;CHEBI:32387;CHEBI:92583,DrugBank=DB00132,SMPDB=PW_C001073,T3DB=T3D4812,FooDB=FDB002947;FDB012462;FDB031277,NANPDB=NANPDB_4238;NANPDB_4832;NANPDB_5316,BMDB=BMDB01388,LipidMAPS=LMFA01030152;LMFA01030153;LMFA01030348;LMFA01030349;LMFA01030350;LMFA01030351;LMFA01030352;LMFA01030353,Urine=HMDB0001388,Saliva=HMDB0001388,Feces=HMDB0001388,ECMDB=ECMDB01388,S…	C18H30O2	Lineolic acids and derivatives	DTOSIQBPPRVQHS-PDBXOOCHSA-N	O=C(O)CCCCCCCC=CCC=CCC=CCC
2	Alpha-Linolenic acid	8.2528	-1	-1	HMDB=HMDB0001388;HMDB0030964,ChEBI=CHEBI:27432;CHEBI:32387;CHEBI:92583,DrugBank=DB00132,SMPDB=PW_C001073,T3DB=T3D4812,FooDB=FDB002947;FDB012462;FDB031277,NANPDB=NANPDB_4238;NANPDB_4832;NANPDB_5316,BMDB=BMDB01388,LipidMAPS=LMFA01030152;LMFA01030153;LMFA01030348;LMFA01030349;LMFA01030350;LMFA01030351;LMFA01030352;LMFA01030353,Urine=HMDB0001388,Saliva=HMDB0001388,Feces=HMDB0001388,ECMDB=ECMDB01388,S…	C18H30O2	Lineolic acids and derivatives	DTOSIQBPPRVQHS-PDBXOOCHSA-N	O=C(O)CCCCCCCC=CCC=CCC=CCC
3	(6Z,9Z,12Z)-octadeca-6,9,12-trienoic acid	7.8752	-1	-1	HMDB=HMDB0003073,KNApSAcK=C00001226,ChEBI=CHEBI:28661;CHEBI:32391;CHEBI:92327,SMPDB=PW_C001772,FooDB=FDB002943,STOFF=STOFF_7143,LipidMAPS=LMFA01030141,Serum=HMDB0003073,PubChem=5280933,PlantCyc=CPD-8117,UNPD=UNPD114489;UNPD164451;UNPD228510,BLEXP=BLEXPDB00000003453	C18H30O2	Lineolic acids and derivatives	VZCCETWTMQHEPK-QNEBEIHSSA-N	O=C(O)CCCCC=CCC=CCC=CCCCCC
4	Gamma-Linolenic acid	7.8615	-1	-1	HMDB=HMDB0003073,KNApSAcK=C00001226,ChEBI=CHEBI:28661;CHEBI:32391;CHEBI:92327,SMPDB=PW_C001772,FooDB=FDB002943,STOFF=STOFF_7143,LipidMAPS=LMFA01030141,Serum=HMDB0003073,PubChem=5280933,PlantCyc=CPD-8117,UNPD=UNPD114489;UNPD164451;UNPD228510,BLEXP=BLEXPDB00000003453	C18H30O2	Lineolic acids and derivatives	VZCCETWTMQHEPK-QNEBEIHSSA-N	O=C(O)CCCCC=CCC=CCC=CCCCCC
5	2alpha-Hydroxy-14,15-dinor-7-labden-13-one	7.6905	-1	-1	KNApSAcK=C00023399,UNPD=UNPD125000	C18H30O2	Sesquiterpenoids	MWINCPOPMHABNZ-JPOCPRQTNA-N	O=C(C)CCC1C(=CCC2C(C)(C)CC(O)CC12C)C
6	7alpha-Hydroxy-14,15-dinor-8(17)-labden-13-one	7.6567	-1	-1	KNApSAcK=C00023400,UNPD=UNPD187666	C18H30O2	Sesquiterpenoids	ZLALDYHBEJYUAT-RJCXQSIDNA-N	O=C(C)CCC1C(=C)C(O)CC2C(C)(C)CCCC12C
7	(9E,11E,13E)-octadeca-9,11,13-trienoic acid	7.6468	-1	-1	HMDB=HMDB0030963,KNApSAcK=C00001216;C00001236;C00029815,ChEBI=CHEBI:8638;CHEBI:10275;CHEBI:38382;CHEBI:38383;CHEBI:38384,FooDB=FDB002945;FDB012466,LipidMAPS=LMFA01030146;LMFA01030147;LMFA01030148;LMFA01030347;LMFA01030883;LMFA01030923,PlantCyc=CPD-8231;CPD-8229,UNPD=UNPD131918;UNPD188081;UNPD189180;UNPD191709;UNPD30504;UNPD60946;UNPD72999,BLEXP=BLEXPDB00000093077	C18H30O2	Lineolic acids and derivatives	CUXYLFPMQMFGPL-SUTYWZMXSA-N	O=C(O)CCCCCCCC=CC=CC=CCCCC
8	Punicic acid	7.6316	-1	-1	HMDB=HMDB0030963,KNApSAcK=C00001216;C00001236;C00029815,ChEBI=CHEBI:8638;CHEBI:10275;CHEBI:38382;CHEBI:38383;CHEBI:38384,FooDB=FDB002945;FDB012466,LipidMAPS=LMFA01030146;LMFA01030147;LMFA01030148;LMFA01030347;LMFA01030883;LMFA01030923,PlantCyc=CPD-8231;CPD-8229,UNPD=UNPD131918;UNPD188081;UNPD189180;UNPD191709;UNPD30504;UNPD60946;UNPD72999,BLEXP=BLEXPDB00000093077	C18H30O2	Lineolic acids and derivatives	CUXYLFPMQMFGPL-MRZTUZPCSA-N	O=C(O)CCCCCCCC=CC=CC=CCCCC
9	4-[(1R,2R,8aS)-2-hydroxy-2,5,5,8a-tetramethyl-3,4,4a,6,7,8-hexahydro-1H-naphthalen-1-yl]-3-buten-2-one	7.6077	-1	-1	ChEBI=CHEBI:110196,UNPD=UNPD133074;UNPD168945;UNPD195685;UNPD228904	C18H30O2	Sesquiterpenoids	SNUHZNCSBAQVJV-RUGIBMRJNA-N	O=C(C=CC1C(O)(C)CCC2C(C)(C)CCCC12C)C
10	4-[(1R,2R,8aS)-2-hydroxy-2,5,5,8a-tetramethyl-decalin-1-yl]but-3-en-2-one	7.6077	-1	-1	ChEBI=CHEBI:110196,UNPD=UNPD133074;UNPD168945;UNPD195685;UNPD228904	C18H30O2	Sesquiterpenoids	SNUHZNCSBAQVJV-GLXGZUSZSA-N	O=C(C=CC1C(O)(C)CCC2C(C)(C)CCCC12C)C
11	19-Hydroxy-15,16-dinor-8(17)-labden-13-one	7.5871	-1	-1	KNApSAcK=C00023401,UNPD=UNPD139197;UNPD139560	C18H30O2	Sesquiterpenoids	KDFIUXIPXNKEPM-JNXWOYCVNA-N	O=C(C)CCC1C(=C)CCC2C(C)(CO)CCCC12C
12	Calendic acid	7.5481	-1	-1	HMDB=HMDB0030962,ChEBI=CHEBI:86148,FooDB=FDB002944,LipidMAPS=LMFA01030143;LMFA01030144;LMFA01030145,PlantCyc=CPD-8228,UNPD=UNPD12075;UNPD4957;UNPD75866,BLEXP=BLEXPDB00000193404	C18H30O2	Lineolic acids and derivatives	DQGMPXYVZZCNDQ-KBPWROHVSA-N	O=C(O)CCCCCCC=CC=CC=CCCCCC
13	(8E,10E,12Z)-octadeca-8,10,12-trienoic acid	7.5481	-1	-1	HMDB=HMDB0030962,ChEBI=CHEBI:86148,FooDB=FDB002944,LipidMAPS=LMFA01030143;LMFA01030144;LMFA01030145,PlantCyc=CPD-8228,UNPD=UNPD12075;UNPD4957;UNPD75866,BLEXP=BLEXPDB00000193404	C18H30O2	Lineolic acids and derivatives	DQGMPXYVZZCNDQ-KBPWROHVSA-N	O=C(O)CCCCCCC=CC=CC=CCCCCC
14	2-(1,2-tetra-decadienyl)-cyclopropanecarboxylic acid	7.5463	-1	-1	LipidMAPS=LMFA01140062,UNPD=UNPD183887	C18H30O2	Cyclopropanecarboxylic acids	UJLCTWQAXHCCFC-UHFFFAOYNA-N	O=C(O)C1CC1C=C=CCCCCCCCCCCC
15	Crepenynic acid	7.5137	-1	-1	KNApSAcK=C00001278,ChEBI=CHEBI:16423;CHEBI:14030,LipidMAPS=LMFA01030741;LMFA01030742,PubChem=5461139;5281024,PlantCyc=CREPENYNATE,UNPD=UNPD69945;UNPD98807	C18H30O2	Long-chain fatty acids	SAOSKFBYQJLQOS-KTKRTIGZSA-N	O=C(O)CCCCCCCC=CCC#CCCCCC
16	(Z)-octadec-9-en-12-ynoic acid	7.5137	-1	-1	KNApSAcK=C00001278,ChEBI=CHEBI:16423;CHEBI:14030,LipidMAPS=LMFA01030741;LMFA01030742,PubChem=5461139;5281024,PlantCyc=CREPENYNATE,UNPD=UNPD69945;UNPD98807	C18H30O2	Long-chain fatty acids	SAOSKFBYQJLQOS-KTKRTIGZSA-N	O=C(O)CCCCCCCC=CCC#CCCCCC
17	5beta-Estrane-3alpha,17beta-diol	7.5059	-1	-1	ChEBI=CHEBI:79716,LipidMAPS=LMST02010019,UNPD=UNPD119889;UNPD176259	C18H30O2	Estrogens and derivatives	QNKATSBSLLYTMH-QPZWGXJQSA-N	OC1CCC2C(CCC3C2CCC4(C)C(O)CCC34)C1
18	(3R,5R,8R,9R,10S,13S,14S,17S)-13-methyl-1,2,3,4,5,6,7,8,9,10,11,12,14,15,16,17-hexadecahydrocyclopenta[a]phenanthrene-3,17-diol	7.5059	-1	-1	ChEBI=CHEBI:79716,LipidMAPS=LMST02010019,UNPD=UNPD119889;UNPD176259	C18H30O2	Estrogens and derivatives	QNKATSBSLLYTMH-QPZWGXJQSA-N	OC1CCC2C(CCC3C2CCC4(C)C(O)CCC34)C1
19	[R-(E,E)]-13-Hydroxy-6,10,14-trimethyl-5,9,14-pentadecatrien-2-one	7.4586	-1	-1	KNApSAcK=C00022152,UNPD=UNPD180469	C18H30O2	Sesquiterpenoids	KUTNIFBDXANLKK-GXSFQCPFNA-N	O=C(C)CCC=C(C)CCC=C(C)CCC(O)C(=C)C
20	(5Z,9Z,12Z)-octadeca-5,9,12-trienoic acid	7.4505	-1	-1	ChEBI=CHEBI:86136,LipidMAPS=LMFA01030342;LMFA01030343;LMFA01030344;LMFA01030815,PubChem=35027726,UNPD=UNPD122411;UNPD183056;UNPD7030;UNPD224546,BLEXP=BLEXPDB00000128849	C18H30O2	Lineolic acids and derivatives	HXQHFNIKBKZGRP-URPRIDOGSA-N	O=C(O)CCCC=CCCC=CCC=CCCCCC
21	ximenynic acid	7.4478	-1	-1	STOFF=STOFF_464,LipidMAPS=LMFA01030560;LMFA01030561,UNPD=UNPD105866;UNPD150537,BLEXP=BLEXPDB00000092809	C18H30O2	Long-chain fatty acids	VENIIVIRETXKSV-UHFFFAOYSA-N	O=C(O)CCCCCCCC#CC=CCCCCCC
22	(E)-octadec-11-en-9-ynoic acid	7.4478	-1	-1	STOFF=STOFF_464,LipidMAPS=LMFA01030560;LMFA01030561,UNPD=UNPD105866;UNPD150537,BLEXP=BLEXPDB00000092809	C18H30O2	Long-chain fatty acids	VENIIVIRETXKSV-BQYQJAHWSA-N	O=C(O)CCCCCCCC#CC=CCCCCCC
23	(5Z,9Z,12Z)-octadecatrienoic acid	7.4375	-1	-1	ChEBI=CHEBI:86136,LipidMAPS=LMFA01030342;LMFA01030343;LMFA01030344;LMFA01030815,PubChem=35027726,UNPD=UNPD122411;UNPD183056;UNPD7030;UNPD224546,BLEXP=BLEXPDB00000128849	C18H30O2	Lineolic acids and derivatives	HXQHFNIKBKZGRP-URPRIDOGSA-N	O=C(O)CCCC=CCCC=CCC=CCCCCC
24	(E,E,Z)-octadeca-11,13,15-trienoic acid	7.4058	-1	-1	ChEBI=CHEBI:44602;CHEBI:38386,DrugBank=DB04747,LipidMAPS=LMFA01030777	C18H30O2	Lineolic acids and derivatives	ZSXWVPXJLXTOQQ-ZRGCPWHVSA-N	O=C(O)CCCCCCCCCC=CC=CC=CCC
25	13Z-Hexadecen-11-ynyl acetate	7.3828	-1	-1	LipidMAPS=LMFA07010364,UNPD=UNPD186383	C18H30O2	Fatty alcohol esters	JMXCLEFVXYXEQH-PLNGDYQASA-N	O=C(OCCCCCCCCCCC#CC=CCC)C
26	Farnesylacetone epoxide	7.3775	-1	-1	KNApSAcK=C00022164,UNPD=UNPD116557;UNPD169314	C18H30O2	Monocyclic monoterpenoids	VZUCBUQOWZRZJJ-VPIROFMUNA-N	O=C(C)CCC=C(C)CCC=C(C)CCC1OC1(C)C
27	Hedaol B;(-)-Hedaol B	7.3665	-1	-1	KNApSAcK=C00046000,UNPD=UNPD180582	C18H30O2	Acyclic diterpenoids	CNESKTGKCQGZAS-KRGPMNSMNA-N	O=C(C=C(C)C)CC(=CCCC(=CCCC(O)C)C)C
28	16-methyl-6Z,9Z,12Z-heptadecatrienoic acid	7.3621	-1	-1	LipidMAPS=LMFA01020209,UNPD=UNPD21198	C18H30O2	Long-chain fatty acids	KGQONBKICZUGHP-LJFLDRDWSA-N	O=C(O)CCCCC=CCC=CCC=CCCC(C)C
29	9,11,14-octadecatrienoic acid	7.3515	-1	-1	ChEBI=CHEBI:38388;CHEBI:38389;CHEBI:38391;CHEBI:38392,LipidMAPS=LMFA01030773	C18H30O2	Lineolic acids and derivatives	STPHBDZEVRWTQO-UHFFFAOYSA-N	O=C(O)CCCCCCCC=CC=CCC=CCCC
30	9,11,15-octadecatrienoic acid	7.3466	-1	-1	ChEBI=CHEBI:38387;CHEBI:38390;CHEBI:48907,LipidMAPS=LMFA02000299,UNPD=UNPD65943	C18H30O2	Lineolic acids and derivatives	WTMLOMJSCCOUNI-UHFFFAOYSA-N	O=C(O)CCCCCCCC=CC=CCCC=CCC
31	10,12,15-octadecatrienoic acid	7.3338	-1	-1	LipidMAPS=LMFA01030156	C18H30O2	Lineolic acids and derivatives	DASDQNZKDMCAQF-SIRUGEDZSA-N	O=C(O)CCCCCCCCC=CC=CCC=CCC
32	Hedaol A;(-)-Hedaol A	7.3311	-1	-1	KNApSAcK=C00045999;C00046001,UNPD=UNPD14958;UNPD9773	C18H30O2	Sesquiterpenoids	TZNBCSGCHOVZDX-WKLBFWJNNA-N	O=C(C=C(C)C)C=C(C)CCCC(=CCCC(O)C)C
33	Lamenallenic acid	7.3231	-1	-1	KNApSAcK=C00047265,ChEBI=CHEBI:38396;CHEBI:38403;CHEBI:38413,LipidMAPS=LMFA01030775;LMFA01030776,UNPD=UNPD114840	C18H30O2	Lineolic acids and derivatives	IHBRXZJPXHXMCN-XFIGMRDHNA-N	O=C(O)CCCC=C=CCCCCCCCCC=CC
34	13-cyclopent-2-en-1-yltridec-6-enoic acid	7.3192	-1	-1	ChEBI=CHEBI:61673;CHEBI:61676,LipidMAPS=LMFA01140020,UNPD=UNPD102312;UNPD177003;UNPD2969;UNPD75217;UNPD219900;UNPD222038	C18H30O2	Long-chain fatty acids	XADKGDBMULSEAC-UHFFFAOYSA-N	O=C(O)CCCCC=CCCCCCCC1C=CCC1
35	(E)-13-cyclopent-2-en-1-yltridec-6-enoic acid	7.3192	-1	-1	ChEBI=CHEBI:61673;CHEBI:61676,LipidMAPS=LMFA01140020,UNPD=UNPD102312;UNPD177003;UNPD2969;UNPD75217;UNPD219900;UNPD222038	C18H30O2	Long-chain fatty acids	XADKGDBMULSEAC-DUXPYHPUSA-N	O=C(O)CCCCC=CCCCCCCC1C=CCC1
36	4-dodecylbenzene-1,3-diol	7.3172	-1	-1	BLEXP=BLEXPDB00000090458	C18H30O2	Resorcinols	JJWVPHWHEGQZOE-UHFFFAOYSA-N	OC1=CC=C(C(O)=C1)CCCCCCCCCCCC
37	[(8S,9R,10S,13S,14R)-2,3,4,5,6,7,8,9,10,11,12,13,14,15,16,17-hexadecahydro-1H-cyclopenta[a]phenanthren-3-yl]methanediol	7.3172	-1	-1	BLEXP=BLEXPDB00054410655	C18H30O2	Steroids and steroid derivatives	VTWPZCXFMUVVJZ-BBLQPCNESA-N	OC(O)C1CCC2C(CCC3C4CCCC4CCC23)C1
38	4-laurylresorcinol	7.3172	-1	-1	BLEXP=BLEXPDB00000090458	C18H30O2	Resorcinols	JJWVPHWHEGQZOE-UHFFFAOYSA-N	OC1=CC=C(C(O)=C1)CCCCCCCCCCCC
39	13-(2-Cyclopentenyl)-9Z-tridecenoic acid	7.3143	-1	-1	LipidMAPS=LMFA01140042	C18H30O2	Long-chain fatty acids	GVHVFTUIDJXBIS-HYXAFXHYNA-N	O=C(O)CCCCCCCC=CCCCC1C=CCC1
40	10E,12E,14E-Hexadecatrienyl acetate	7.3054	-1	-1	LipidMAPS=LMFA07010350;LMFA07010352	C18H30O2	Fatty alcohol esters	RHQLQUKJKWSMFG-ARQDATDDSA-N	O=C(OCCCCCCCCCC=CC=CC=CC)C
41	(E,E)-6-Methyl-10-(tetrahydro-5,5-dimethyl-2-furanyl)-5,9-undecadien-2-one	7.3039	-1	-1	KNApSAcK=C00022148,UNPD=UNPD183173	C18H30O2	Terpene glycosides	XKFUZZHODDFIKA-AOEKMSOUNA-N	O=C(C)CCC=C(C)CCC=C(C)C1OC(C)(C)CC1
42	Di-nonylpheno	7.3034	-1	-1	STOFF=STOFF_3072	C18H30O2	Catechols	LAPHHMVDAWDHHI-UHFFFAOYNA-N	OC1=CC=C(C=C1O)C(C)CC(C)CC(C)CC(C)C
43	5312491	7.2961	-1	-1	KNApSAcK=C00047265,ChEBI=CHEBI:38396;CHEBI:38403;CHEBI:38413,LipidMAPS=LMFA01030775;LMFA01030776,UNPD=UNPD114840	C18H30O2	Lineolic acids and derivatives	IHBRXZJPXHXMCN-NSCUHMNNSA-N	O=C(O)CCCC=C=CCCCCCCCCC=CC
44	17-Octadecen-9-ynoic acid	7.2928	-1	-1	KNApSAcK=C00047138,LipidMAPS=LMFA01030562	C18H30O2	Long-chain fatty acids	JSDJDUFIGGRVBJ-UHFFFAOYSA-N	O=C(O)CCCCCCCC#CCCCCCCC=C
45	9,12,14-octadecatrienoic acid	7.2869	-1	-1	LipidMAPS=LMFA01030151	C18H30O2	Lineolic acids and derivatives	WLRRKOLEXBNXGR-ZYXMWXIMSA-N	O=C(O)CCCCCCCC=CCC=CC=CCCC
46	Caleic acid	7.2849	-1	-1	LipidMAPS=LMFA01030140;LMFA01031055,UNPD=UNPD136567	C18H30O2	Lineolic acids and derivatives	FEWFGHQMEYATJR-XTEDJDMISA-N	O=C(O)CC=CCCCCC=CCC=CCCCCC
47	7E-Octadecen-9-ynoic acid	7.2813	-1	-1	LipidMAPS=LMFA01031047,UNPD=UNPD133342;UNPD78346	C18H30O2	Long-chain fatty acids	BWSIKEZDJMZITO-VAWYXSNFSA-N	O=C(O)CCCCCC=CC#CCCCCCCCC
48	4-[3-(4,8-Dimethyl-3,7-nonadienyl)-3-methyloxiranyl]-2-butanone	7.2753	-1	-1	KNApSAcK=C00022150,UNPD=UNPD182546	C18H30O2	Monocyclic monoterpenoids	YZNVJVWNDZBBBA-XNTDXEJSNA-N	O=C(C)CCC1OC1(C)CCC=C(C)CCC=C(C)C
49	Isorumelenic acid	7.2742	-1	-1	LipidMAPS=LMFA02000298,UNPD=UNPD28508	C18H30O2	Lineolic acids and derivatives	REOBRTYMNNYVNT-NZCJRGAMSA-N	O=C(O)CCCCCCCC=CCCC=CC=CCC
50	10,12,14-octadecatrienoic acid	7.2721	-1	-1	LipidMAPS=LMFA01030154;LMFA01030155	C18H30O2	Lineolic acids and derivatives	PGJFZEZVGMGXJZ-UHFFFAOYSA-N	O=C(O)CCCCCCCCC=CC=CC=CCCC
51	6,10,14-octadecatrienoic acid	7.2546	-1	-1	LipidMAPS=LMFA01030142,UNPD=UNPD115482	C18H30O2	Lineolic acids and derivatives	QWIGRJKFODXCPT-UJIFBZJGSA-N	O=C(O)CCCCC=CCCC=CCCC=CCCC
52	7E,9Z,12Z-octadecatrienoic acid	7.2437	-1	-1	LipidMAPS=LMFA01030345;LMFA01030346	C18H30O2	Lineolic acids and derivatives	RTILLKWKMLNKLK-JSHIYTDESA-N	O=C(O)CCCCCC=CC=CCC=CCCCCC
53	5,8,11-octadecatrienoic acid	7.236	-1	-1	LipidMAPS=LMFA01030341	C18H30O2	Lineolic acids and derivatives	OQKSACYFUKAOOJ-SPOHZTNBSA-N	O=C(O)CCCC=CCC=CCC=CCCCCCC
54	2E,9Z,12Z-octadecatrienoic acid	7.2266	-1	-1	LipidMAPS=LMFA01030339	C18H30O2	Lineolic acids and derivatives	VCVCZNVYBRBLHO-YGLXTWLWSA-N	O=C(O)C=CCCCCCC=CCC=CCCCCC
55	11Z,13E,15-Hexadecatrienyl acetate	7.2106	-1	-1	LipidMAPS=LMFA07010370	C18H30O2	Fatty alcohol esters	LSRIOUSPMIDHBL-DEQVHDEQSA-N	O=C(OCCCCCCCCCCC=CC=CC=C)C
56	Xionenynic acid	7.2094	-1	-1	LipidMAPS=LMFA01031039	C18H30O2	Long-chain fatty acids	LYAZOPAKEWHIMH-HJWRWDBZSA-N	O=C(O)CCCCCCC#CC=CCCCCCCC
57	3Z,6Z,9Z-Octadecatrienoic acid	7.2077	-1	-1	LipidMAPS=LMFA02000319	C18H30O2	Lineolic acids and derivatives	NTKHCYPTISBJFG-YOILPLPUSA-N	O=C(O)CC=CCC=CCC=CCCCCCCCC
58	2,5-bis(1,1-dimethylbutyl)hydroquinone	7.2007	-1	-1	STOFF=STOFF_6475	C18H30O2	Phenylpropanes	ZHUWKKIRCLKYNJ-UHFFFAOYSA-N	OC=1C=C(C(O)=CC1C(C)(C)CCC)C(C)(C)CCC
59	4E,6E,11Z-Hexadecatrienyl acetate	7.1897	-1	-1	LipidMAPS=LMFA07010354,UNPD=UNPD28569	C18H30O2	Fatty alcohol esters	OBUFHUJYTJTQRE-NJBFDSBMSA-N	O=C(OCCCC=CC=CCCCC=CCCCC)C
60	Alvaradonic acid	7.1635	-1	-1	LipidMAPS=LMFA01031030	C18H30O2	Long-chain fatty acids	LOKGDWZGVSRJRI-UHFFFAOYSA-N	O=C(O)CCCCCCC#CCCCCCCCC=C
61	Alvaradoic acid	7.1583	-1	-1	LipidMAPS=LMFA01031029	C18H30O2	Long-chain fatty acids	VTNSDMZVIKRPSZ-UHFFFAOYSA-N	O=C(O)CCCCC#CCCCCCCCCCC=C
62	4E,6E,10Z-Hexadecatrienyl acetate	7.1378	-1	-1	LipidMAPS=LMFA07010353;LMFA07010360	C18H30O2	Fatty alcohol esters	GCCUWZBYWXQZDX-ZZKSJZGLSA-N	O=C(OCCCC=CC=CCCC=CCCCCC)C
63	(E,E)-3,7,11-Trimethyl-2,6,10-dodecatrienyl propionate	7.1314	-1	-1	LipidMAPS=LMFA07010541,UNPD=UNPD126508	C18H30O2	Sesquiterpenoids	XFACLYNWBJYMCK-IUBLYSDUSA-N	O=C(OCC=C(C)CCC=C(C)CCC=C(C)C)CC
64	(Z,E)-6,10,14-Trimethyl-5,10-pentadecadiene-2,12-dione	7.1294	-1	-1	KNApSAcK=C00022162,UNPD=UNPD47453;UNPD62641	C18H30O2	Sesquiterpenoids	WFIQWFJWGZPVFS-ZAYWLTRMSA-N	O=C(C=C(C)CCCC(=CCCC(=O)C)C)CC(C)C
65	octadeca-2,4,6-trienoic acid	7.1274	-1	-1	BLEXP=BLEXPDB00000186112	C18H30O2	Lineolic acids and derivatives	ZUUFLXSNVWQOJW-UHFFFAOYSA-N	O=C(O)C=CC=CC=CCCCCCCCCCCC
66	(4E,6E,15E)-octadeca-4,6,15-trienoic acid	7.1163	-1	-1	BLEXP=BLEXPDB00129630212	C18H30O2	Lineolic acids and derivatives	PINZCNRQCWNMQE-LHSSQZBRSA-N	O=C(O)CCC=CC=CCCCCCCCC=CCC
67	Isogorlic acid	7.1139	-1	-1	LipidMAPS=LMFA01140035	C18H30O2	Long-chain fatty acids	LZZANLYIVGPJEZ-VURMDHGXNA-N	O=C(O)CCC=CCCCCCCCCC1C=CCC1
68	(E,E)-6,10,14-Trimethyl-5,9-pentadecadiene-2,12-dione	7.1038	-1	-1	KNApSAcK=C00022161,UNPD=UNPD67864	C18H30O2	Sesquiterpenoids	VSKHIMSIYRKCTC-KAVGSWPWSA-N	O=C(C)CCC=C(C)CCC=C(C)CC(=O)CC(C)C
69	UNPD193892	6.9201	-1	-1	UNPD=UNPD193892;UNPD204849	C18H30O2	Sesquiterpenoids	YMFUKUBKNARDRB-CTTLQJJWNA-N	O=C(C)CCC1C(=C)CCC2C(C)(C)C(O)CCC12C
70	UNPD182668	6.8106	-1	-1	UNPD=UNPD182668	C18H30O2	Sesquiterpenoids	LTKPTPJAITTZMS-FSFKACEONA-N	O=C(C)CCC=C(C)CCC1C2CC2CC(O)C1(C)C
71	UNPD60340	6.782	-1	-1	UNPD=UNPD60340	C18H30O2	Naphthopyrans	LRJUWHLEMHCWJI-LFCXUTNENA-N	OC1CCC2(C)C3CC=C(OC3(C)CCC2C1(C)C)C
72	UNPD145053	6.7783	-1	-1	UNPD=UNPD145053	C18H30O2	Sesquiterpenoids	AXTSIJIRCLEZEN-QGOYFIDNNA-N	O=C(C)CCC=C(C)CCC1C(=C)CCC(O)C1(C)C
73	(8alpha,13S)-8,13:13,17-Diepoxy-14,15-dinorlabdane	6.764	-1	-1	KNApSAcK=C00023379	C18H30O2	Naphthopyrans	PHNCACYNYORRNS-NMBWQYNVNA-N	O1CC23OC1(C)CCC2C4(C)CCCC(C)(C)C4CC3
74	UNPD2442	6.7499	-1	-1	UNPD=UNPD2442	C18H30O2	Medium-chain fatty acids	QQPOPKOZBMEWKE-DXXVLHPQNA-N	O=C(O)C=C(C)CCC1CCCC2C(C)CCCC12C
75	UNPD103855	6.7427	-1	-1	UNPD=UNPD103855	C18H30O2	Sesquiterpenoids	DDVNUHLHDWACFY-QGOYFIDNNA-N	O=C(C)CCC=C(C)CCC1C(=CCC(O)C1(C)C)C
76	UNPD147996	6.7427	-1	-1	UNPD=UNPD147996	C18H30O2	Sesquiterpenoids	BOCJMIRVDOHYKS-AZNGQLPBNA-N	O=C(C)CCC=C(C)CCC1=C(C)CCC(O)C1(C)C
77	UNPD82452	6.6864	-1	-1	UNPD=UNPD82452	C18H30O2	Butenolides	ZOVPLJJDPDLGND-GKWUYMGLNA-N	O=C1OC(C=C1CC)(CC)CCCC(C=CCC)CC
78	UNPD59032	6.6501	-1	-1	UNPD=UNPD59032	C18H30O2	Macrolides and analogues	HTERFNUMHPQMKV-LUEWMNGENA-N	O=C1OC(C=CC=CCCCCCCC1)CCCCC
79	UNPD201674	6.6426	-1	-1	UNPD=UNPD201674	C18H30O2	Methoxyphenols	PGCYEKRDYMCFNF-UHFFFAOYSA-N	OC=1C=C(OC)C=C(C1)CCCCCCCCCCC
80	UNPD113412	6.634	-1	-1	UNPD=UNPD113412	C18H30O2	Acyclic monoterpenoids	MLIZDIZAMVPOLA-IQUNEEPMNA-N	O=C(O)C=CC(=CC(CC)CC(C=CCC)CC)CC
81	UNPD77914	6.6248	-1	-1	UNPD=UNPD77914	C18H30O2	Estrogens and derivatives	MCSOAOQYLKJIHF-QGXGIIPJNA-N	OC1CCC2C(CCC3C2CCC4(C)CC(O)CC34)C1
82	UNPD207389	6.5954	-1	-1	UNPD=UNPD207389	C18H30O2	Catechols	IGLIUFGSGJRAQF-UHFFFAOYSA-N	OC1=CC=C(C=C1O)CCCCCCCCCCCC
83	UNPD127512	6.593	-1	-1	UNPD=UNPD127512	C18H30O2	Long-chain fatty acids	WHEVOQUCZMDNBG-AATRIKPKSA-N	O=C(O)CCCCCCCCCC#CC=CCCCC
84	UNPD109917	6.5672	-1	-1	UNPD=UNPD109917	C18H30O2	Resorcinols	VXCBVCVQEPHVDJ-UHFFFAOYSA-N	OC=1C=C(O)C=C(C1)CCCCCCCCCCCC
85	UNPD119195	6.5591	-1	-1	UNPD=UNPD119195	C18H30O2	Gamma butyrolactones	XHXKILDGHUJLNF-ZNEOLFTANA-N	O=C1OC(CC1)CCCCC=CCC=CCCCCC
86	UNPD48081	6.5408	-1	-1	UNPD=UNPD48081;UNPD73769;UNPD222161	C18H30O2	Fatty acid methyl esters	LRGHKKFXSQEYHY-JSIPCRQOSA-N	O=C(OC)CCCCCCC=CCC=CCC=CCC
87	UNPD75903	6.51	-1	-1	UNPD=UNPD75903;UNPD80005;UNPD226395	C18H30O2	Lineolic acids and derivatives	KQQKGWQCNNTQJW-PVXPXURCSA-N	O=C(O)CCCCCCCC=CCC=CCCC=CC
88	UNPD177475	6.5092	-1	-1	UNPD=UNPD177475	C18H30O2	Fatty acid methyl esters	QSOXHGWBNRSJPE-CMDGGOBGSA-N	O=C(OC)CCCCCCC#CC=CCCCCCC
89	UNPD130599	6.5022	-1	-1	UNPD=UNPD130599;UNPD208249;UNPD213780	C18H30O2	Lineolic acids and derivatives	URICKULZPCAYSQ-DNCVSKIPSA-N	O=C(O)CCCCCCCC=CCCC=CCC=CC
90	UNPD130003	6.4998	-1	-1	UNPD=UNPD130003	C18H30O2	Acyclic diterpenoids	BCMCYUUFPFCEKN-GVGVLJMYSA-N	O=C(C)CCC=C(C)CCC=C(C)CCC=C(C)CO
91	UNPD50271	6.4814	-1	-1	UNPD=UNPD50271	C18H30O2	Lineolic acids and derivatives	JJTZDTIVFFYIOY-HZJYTTRNSA-N	O=C(O)CCCCCCCC=CCC=CCCCC=C
92	UNPD132355	6.4556	-1	-1	UNPD=UNPD132355	C18H30O2	Long-chain fatty acids	UAMGAHBYTASXHU-MDZDMXLPSA-N	O=C(O)CCCCCC#CC=CCCCCCCCC
93	UNPD40139	6.4312	-1	-1	UNPD=UNPD40139	C18H30O2	Lineolic acids and derivatives	DTQYXDZPCFKIAK-QVXMOSSBSA-N	O=C(O)C=CCCCCCCC=CCC=CCCCC
94	UNPD43655	6.4281	-1	-1	UNPD=UNPD43655	C18H30O2	Furanoid fatty acids	CDQRKPOIGQRDHU-UHFFFAOYSA-N	O=C(C=1OC(=CC1)CCCCCCCCCCCC)C
95	UNPD74487	6.4199	-1	-1	UNPD=UNPD74487	C18H30O2	Long-chain fatty acids	DSZQZURPKJVVGY-VAWYXSNFSA-N	O=C(O)CCCC#CC=CCCCCCCCCCC
96	UNPD151971	6.402	-1	-1	UNPD=UNPD151971	C18H30O2	Oxolanes	YREXDJKVVZTWSU-NLXUTBJZNA-N	O=C(C)CCC=C(C)CCC1C2(OC(CC2)C1(C)C)C
97	UNPD43145	6.375	-1	-1	UNPD=UNPD43145	C18H30O2	Long-chain fatty alcohols	FTUAIEDAAMWBHD-HHJXOHNLNA-N	O=C=CCCCCCCC=CC=CC(O)CCCCC
98	UNPD3653	6.3317	-1	-1	UNPD=UNPD3653	C18H30O2	Sesquiterpenoids	IGJMOONLKHMHNY-FGIKTZQUNA-N	O=C(C)CCC=C(C)CCC(=O)C1(C)CCC1C(C)C
99	UNPD83541	6.2967	-1	-1	UNPD=UNPD83541	C18H30O2	Sesquiterpenoids	PSKPVVULUXBPSS-BXIATTARSA-N	O=C(C)CCC=C(C)CCC=C(C)CCC(=O)C(C)C
100	1,4-dihexoxybenzene	5.6022	-1	-1		C18H30O2	Phenol ethers	ASWOZWYFBVLCMR-UHFFFAOYSA-N	O(C1=CC=C(OCCCCCC)C=C1)CCCCCC
101	5-[2-aminoethyl(hexyl)amino]pentane-1,2,3,4-tetrol	4.9348	-1	-1		C13H30N2O4		FZPGMQKDEKUHSB-UHFFFAOYSA-N	OCC(O)C(O)C(O)CN(CCN)CCCCCC
102	[2-methoxy-2-(2-methoxy-4-methyleneammonio-1-methylol-butoxy)ethyl]-trimethyl-ammonium	4.7981	-1	-1		C13H30N2O4		XDERSEYGUYHICU-UHFFFAOYSA-O	OCC(OC(OC)C[N+](C)(C)C)C(OC)CC[NH+]=C
103	3-[2-[bis(2-hydroxybutyl)amino]ethylamino]propane-1,2-diol	4.7496	-1	-1		C13H30N2O4		MPNFIGQFNROVIB-UHFFFAOYSA-N	OCC(O)CNCCN(CC(O)CC)CC(O)CC
104	(2R,3S,4R)-6-[5-aminopentyl(methyl)amino]-5-methyl-hexane-1,2,3,4-tetrol	4.7396	-1	-1		C13H30N2O4		KLMOERYPHFKVMH-KIGPFUIMSA-N	OCC(O)C(O)C(O)C(C)CN(C)CCCCCN
105	1-(6-aminohexylamino)-3-(2-hydroxy-3-methoxy-propoxy)propan-2-ol	4.6879	-1	-1		C13H30N2O4	Glycerol ethers	LEDREYACAYSGMY-UHFFFAOYSA-N	OC(COC)COCC(O)CNCCCCCCN
106	6-(5-aminohexylamino)-2-methylol-hexane-1,3,5-triol	4.6434	-1	-1		C13H30N2O4	1,2-aminoalcohols	RFTZWOYTZGECRS-UHFFFAOYSA-N	OCC(CO)C(O)CC(O)CNCCCCC(N)C
107	6-allyloxy-5-amino-2-(aminomethyl)tetrahydropyran-3,4-diol;ethane	4.6425	-1	-1		C13H30N2O4		CWXZCNJMBBXXGM-UHFFFAOYSA-N	OC1C(O)C(N)C(OCC=C)OC1CN.CC.CC
108	6-(6-aminohexylamino)-2-methylol-hexane-1,3,5-triol	4.6414	-1	-1		C13H30N2O4	1,2-aminoalcohols	HZZNWQSPYHSIIQ-UHFFFAOYSA-N	OCC(CO)C(O)CC(O)CNCCCCCCN
109	3-[1-(3-aminopropyl)heptylperoxyperoxy]propylamine	4.6088	-1	-1		C13H30N2O4	Organooxygen compounds	MQNKPQOWBSTYQJ-UHFFFAOYSA-N	O(OOC(CCCN)CCCCCC)OCCCN
110	3-amino-2-[bis(2-ethoxyethyl)amino]-4-methoxy-butan-1-ol	4.6008	-1	-1		C13H30N2O4	1,3-aminoalcohols	RSXVENZRGWRLCF-UHFFFAOYSA-N	OCC(N(CCOCC)CCOCC)C(N)COC
111	1-[2-[2-(2-aminoethoxy)ethoxy]ethyl-(2-hydroxypropyl)amino]butan-2-ol	4.5936	-1	-1		C13H30N2O4	1,2-aminoalcohols	AMIHNDPNRWBLCV-UHFFFAOYSA-N	OC(C)CN(CCOCCOCCN)CC(O)CC
112	1-(dimethylamino)-3-[[3-(2-ethoxyethoxy)-2-hydroxy-propyl]amino]-2-methyl-propan-2-ol	4.5784	-1	-1		C13H30N2O4	Tertiary alcohols	OTQVDUQNIZGRAG-UHFFFAOYSA-N	OC(COCCOCC)CNCC(O)(C)CN(C)C
113	4-tert-butoxy-2-methyl-1-(1,2,3-triaminopropylamino)butane-1,4-diol	4.5617	-1	-1		C12H30N4O3		YPIAKPFJTSBGNU-UHFFFAOYSA-N	OC(OC(C)(C)C)CC(C)C(O)NC(N)C(N)CN
114	1-[4-[3-(2-aminoethylamino)-2-hydroxy-propoxy]butoxy]butan-2-ol	4.5567	-1	-1		C13H30N2O4	1,2-aminoalcohols	DUZDOHXPEDCBIA-UHFFFAOYSA-N	OC(COCCCCOCC(O)CC)CNCCN
115	3-[1-(diethylamino)propyl-(3-hydroxypropoxy)amino]oxypropan-1-ol	4.544	-1	-1		C13H30N2O4	N-organohydroxylamines	ZIFVSXAHPXCKRE-UHFFFAOYSA-N	OCCCON(OCCCO)C(N(CC)CC)CC
116	[2-(aminomethyl)-4-[2-[2-(2-ethoxyethoxy)ethoxy]ethoxy]butyl]amine	4.5405	-1	-1		C13H30N2O4		JBQGUKOBCYPUMZ-UHFFFAOYSA-N	O(CC)CCOCCOCCOCCC(CN)CN
117	1-(dimethylamino)-3-[[2-hydroxy-3-(2-methoxy-1-methyl-ethoxy)propyl]amino]-2-methyl-propan-2-ol	4.5301	-1	-1		C13H30N2O4	Tertiary alcohols	HHFQFHWBZNTDDY-UHFFFAOYSA-N	OC(COC(C)COC)CNCC(O)(C)CN(C)C
118	2,2-bis[2-(dimethylamino)ethoxymethyl]propane-1,3-diol	4.526	-1	-1		C13H30N2O4	Trialkylamines	QQYYDXPNJFHNHN-UHFFFAOYSA-N	OCC(CO)(COCCN(C)C)COCCN(C)C
119	1-[2-[2-(dimethylamino)ethoxy]ethylamino]-3-(2-ethoxyethoxy)propan-2-ol	4.5231	-1	-1		C13H30N2O4	1,2-aminoalcohols	ZOJSXJGUQHJBIJ-UHFFFAOYSA-N	OC(COCCOCC)CNCCOCCN(C)C
120	1-(dimethylamino)-3-[2-[2-(2-methoxyethoxy)ethoxy]ethylamino]-2-methyl-propan-2-ol	4.5153	-1	-1		C13H30N2O4	Tertiary alcohols	MRHWZULXWQTRJO-UHFFFAOYSA-N	OC(C)(CNCCOCCOCCOC)CN(C)C
121	1-(2-ethoxyethoxy)-3-[2-[2-methoxyethyl(methyl)amino]ethylamino]propan-2-ol	4.51	-1	-1		C13H30N2O4	1,2-aminoalcohols	LNKZGKXMLSHXBK-UHFFFAOYSA-N	OC(COCCOCC)CNCCN(C)CCOC
122	4-amino-4-ethyl-5-(hydroxyamino)-5-(1-hydroxypropyl)octane-3,6-diol	4.5062	-1	-1		C13H30N2O4		TVGGVSFBWYCTNO-UHFFFAOYSA-N	ONC(C(O)CC)(C(O)CC)C(N)(CC)C(O)CC
123	2-[2-(dimethylamino)ethoxy]-2-[2-[3-(dimethylamino)propoxy]ethoxy]ethanol	4.4977	-1	-1		C13H30N2O4	Trialkylamines	DSZUMPHUGOEHTA-UHFFFAOYSA-N	OCC(OCCOCCCN(C)C)OCCN(C)C
124	2-[2-[2-[2-(2-aminoethoxy)ethoxy]ethoxy]ethoxy]ethyl-isopropyl-amine	4.4809	-1	-1		C13H30N2O4		HHJUAMBGVWGAFD-UHFFFAOYSA-N	O(CCOCCOCCNC(C)C)CCOCCN
125	1-[2-[2-methoxyethyl(methyl)amino]ethylamino]-3-(2-methoxy-1-methyl-ethoxy)propan-2-ol	4.4713	-1	-1		C13H30N2O4	1,2-aminoalcohols	MEPQAJHMMYLOSR-UHFFFAOYSA-N	OC(COC(C)COC)CNCCN(C)CCOC
126	3-aminopropyl-[2-[2-(2-methoxyethoxy)ethoxy]ethyl]-(2-methoxyethyl)amine	4.4628	-1	-1		C13H30N2O4	Trialkylamines	LSOVJCLOLYSJHN-UHFFFAOYSA-N	O(C)CCOCCOCCN(CCOC)CCCN
127	1-[3-[2-[2-(3-aminopropoxy)ethoxy]ethoxy]propylamino]propan-2-ol	4.4607	-1	-1		C13H30N2O4		WVQMTKOBMGBJPU-UHFFFAOYSA-N	OC(C)CNCCCOCCOCCOCCCN
128	1-[2-[2-[2-(2-hydroxypropylamino)ethoxy]ethoxy]ethylamino]butan-2-ol	4.4473	-1	-1		C13H30N2O4	1,2-aminoalcohols	UFAVBQKRJHAXGN-UHFFFAOYSA-N	OC(C)CNCCOCCOCCNCC(O)CC
129	1-[2-[2-(dimethylamino)ethoxy]ethylamino]-3-(2-methoxy-1-methyl-ethoxy)propan-2-ol	4.447	-1	-1		C13H30N2O4	1,2-aminoalcohols	RZKHAEYSAJPSAT-UHFFFAOYSA-N	OC(COC(C)COC)CNCCOCCN(C)C
130	2-[diethylamino(diethylaminooxy)methyl]-2-methylol-propane-1,3-diol	4.4434	-1	-1		C13H30N2O4	N-organohydroxylamines	DVOWAVLCBUJILP-UHFFFAOYSA-N	OCC(CO)(CO)C(ON(CC)CC)N(CC)CC
131	4-[3-[3-hydroxy-1-[(2-hydroxy-1-methyl-ethyl)amino]propoxy]propylamino]butan-1-ol	4.4415	-1	-1		C13H30N2O4	Hemiaminals	ZGPDJEUSCIVPST-UHFFFAOYSA-N	OCCCCNCCCOC(NC(C)CO)CCO
132	[2-[2-(2-aminoethylamino)ethylamino]-1-ethoxy-ethyl]-diethoxy-amine	4.426	-1	-1		C12H30N4O3		OHJRDMBJSIHZMT-UHFFFAOYSA-N	O(N(OCC)C(OCC)CNCCNCCN)CC
133	1-(2-methoxyethylamino)-3-[2-methoxyethyl-(2-methoxy-1-methyl-ethyl)amino]propan-2-ol	4.3973	-1	-1		C13H30N2O4		HLUWRDHQSSKNFT-UHFFFAOYSA-N	OC(CNCCOC)CN(CCOC)C(C)COC
134	2-[2-[2-[2-(2-methoxyethoxy)ethoxy]ethoxy]ethylamino]ethyl-dimethyl-amine	4.3968	-1	-1		C13H30N2O4	Trialkylamines	YKASNHPLHFJQSH-UHFFFAOYSA-N	O(C)CCOCCOCCOCCNCCN(C)C
135	[1-(aminomethyl)-2,2-dimethoxy-1-methyl-ethyl]-(2-methoxyethyl)-(2-methoxy-1-methyl-ethyl)amine	4.3934	-1	-1		C13H30N2O4	Trialkylamines	UFBMFXBSZGKHIS-UHFFFAOYSA-N	O(C)CCN(C(C)COC)C(C)(CN)C(OC)OC
136	1-[3,3-bis(2-methoxyethylamino)propoxy]-2-methyl-propan-2-ol	4.3835	-1	-1		C13H30N2O4		XDPBFFAOJMKDPE-UHFFFAOYSA-N	OC(C)(C)COCCC(NCCOC)NCCOC
137	[1-(aminomethyl)-3,3-dimethoxy-propyl]-(2-methoxyethyl)-(2-methoxy-1-methyl-ethyl)amine	4.377	-1	-1		C13H30N2O4	Trialkylamines	HLNULMGVRRKLKG-UHFFFAOYSA-N	O(C)CCN(C(C)COC)C(CN)CC(OC)OC
138	[1-(aminomethyl)-2,2-dimethoxy-1-methyl-ethyl]-(2-methoxyethyl)-(3-methoxypropyl)amine	4.3762	-1	-1		C13H30N2O4	Trialkylamines	OCAWVZVSJKOWAB-UHFFFAOYSA-N	O(C)CCN(CCCOC)C(C)(CN)C(OC)OC
139	6,6-diamino-3-(3,3-diaminopropyl)-1-(2-hydroxy-1-methyl-ethoxy)hexan-2-ol	4.3728	-1	-1		C12H30N4O3		OYYGEZMROOCZCG-UHFFFAOYSA-N	OCC(OCC(O)C(CCC(N)N)CCC(N)N)C
140	4,5-diamino-4-(1-hydroxyethyl)-5-(1-hydroxypropyl)octane-3,6-diol	4.3698	-1	-1		C13H30N2O4		AKNPIOBQSDFUIG-UHFFFAOYSA-N	OC(C)C(N)(C(O)CC)C(N)(C(O)CC)C(O)CC
141	[1-(aminomethyl)-3,3-dimethoxy-propyl]-(2-methoxyethyl)-(3-methoxypropyl)amine	4.362	-1	-1		C13H30N2O4	Trialkylamines	CCFVXRWENAQPLJ-UHFFFAOYSA-N	O(C)CCN(CCCOC)C(CN)CC(OC)OC
142	3,6-diamino-2,3,4,5,6-pentamethyl-octane-2,4,5,7-tetrol	4.3577	-1	-1		C13H30N2O4	1,3-aminoalcohols	OPAXEHUTSKTQJU-UHFFFAOYSA-N	OC(C)C(N)(C)C(O)(C)C(O)(C)C(N)(C)C(O)(C)C
143	1-[2-[bis(1-hydroxypropyl)amino]ethyl-(1-hydroxyethyl)amino]propan-1-ol	4.3546	-1	-1		C13H30N2O4		QPXLTMYRCFBVKG-UHFFFAOYSA-N	OC(N(CCN(C(O)CC)C(O)CC)C(O)CC)C
144	1-(2-methoxyethylamino)-3-[2-methoxyethyl(3-methoxypropyl)amino]propan-2-ol	4.353	-1	-1		C13H30N2O4		NGJJGKNQSYKDLP-UHFFFAOYSA-N	OC(CNCCOC)CN(CCOC)CCCOC
145	2-[2-[2-[2-[2-(ethylamino)ethoxy]ethoxy]ethyl-methyl-amino]ethoxy]ethanol	4.3504	-1	-1		C13H30N2O4		ZFPSGBWMTGEASJ-UHFFFAOYSA-N	OCCOCCN(C)CCOCCOCCNCC
146	2-[2-[2-[2-(2-aminoethoxy)-1-methyl-ethoxy]-1-methyl-ethoxy]-1-methyl-ethoxy]ethylamine	4.3414	-1	-1		C13H30N2O4		CRAHMMXJGOSALL-UHFFFAOYSA-N	O(CCN)CC(OCC(OCC(OCCN)C)C)C
147	1-[3-aminopropyl-(2,3-dihydroxy-2-methyl-butyl)amino]-2-methyl-butane-2,3-diol	4.3377	-1	-1		C13H30N2O4	1,3-aminoalcohols	HZJQZPBENWBFOG-UHFFFAOYSA-N	OC(C)C(O)(C)CN(CCCN)CC(O)(C)C(O)C
148	1-[[bis(1-hydroxypropyl)amino]methyl-(1-hydroxypropyl)amino]propan-1-ol	4.3295	-1	-1		C13H30N2O4	Hemiaminals	FESRMMKRUBXFIV-UHFFFAOYSA-N	OC(N(CN(C(O)CC)C(O)CC)C(O)CC)CC
149	5-amino-4-(2-hydroxyethylamino)-4-(2-hydroxypropyl)octane-2,7-diol	4.3284	-1	-1		C13H30N2O4	1,3-aminoalcohols	MZOOATZAFYWQJE-UHFFFAOYSA-N	OCCNC(CC(O)C)(CC(O)C)C(N)CC(O)C
150	4-amino-5-(2-hydroxyethylamino)-4-(2-hydroxypropyl)octane-2,7-diol	4.3284	-1	-1		C13H30N2O4	1,3-aminoalcohols	CXPYUNQAPVMUQV-UHFFFAOYSA-N	OCCNC(CC(O)C)C(N)(CC(O)C)CC(O)C
151	3-[2-[2-[2-(3-aminopropoxy)ethoxy]-1-methyl-ethoxy]ethoxy]propylamine	4.3249	-1	-1		C13H30N2O4	Dialkyl ethers	ULDULEWXLBCJRC-UHFFFAOYSA-N	O(CCOCC(OCCOCCCN)C)CCCN
152	[1-(aminomethyl)-3,3-dimethoxy-1-methyl-propyl]-bis(2-methoxyethyl)amine	4.3156	-1	-1		C13H30N2O4	Trialkylamines	BZNMJVDLROCANF-UHFFFAOYSA-N	O(C)CCN(CCOC)C(C)(CN)CC(OC)OC
153	2-[2-[[2-(2-hydroxyethoxy)propyl-methyl-amino]methyl-methyl-amino]-1-methyl-ethoxy]ethanol	4.3138	-1	-1		C13H30N2O4		GWSPNDKWOGYWJO-UHFFFAOYSA-N	OCCOC(C)CN(C)CN(C)CC(OCCO)C
154	4-[2-(2-aminoethylamino)ethylamino]-3-[bis(1-hydroxyethyl)amino]butan-2-ol	4.3068	-1	-1		C12H30N4O3	1,3-aminoalcohols	YQVZIRVSFBVJMX-UHFFFAOYSA-N	OC(N(C(O)C)C(CNCCNCCN)C(O)C)C
155	1-[2-[1-hydroxyethyl(2-hydroxypropyl)amino]ethyl-(2-hydroxypropyl)amino]propan-2-ol	4.2977	-1	-1		C13H30N2O4	Hemiaminals	QARGZRNNRLCUPK-UHFFFAOYSA-N	OC(N(CCN(CC(O)C)CC(O)C)CC(O)C)C
156	1-[2-[bis(2-hydroxypropyl)amino]ethyl-(2-hydroxyethyl)amino]propan-2-ol	4.2977	-1	-1		C13H30N2O4	1,2-aminoalcohols	VUTCGUXQNADIRX-UHFFFAOYSA-N	OCCN(CCN(CC(O)C)CC(O)C)CC(O)C
157	2-[2-(2-methoxyethoxy)ethoxy]ethyl-[2-(2-methoxyethylamino)ethyl]-methyl-amine	4.2945	-1	-1		C13H30N2O4	Trialkylamines	QNOGKOLEHZVZQW-UHFFFAOYSA-N	O(C)CCOCCOCCN(C)CCNCCOC
158	2-[2-[2-(2-methoxyethoxy)ethoxy]ethylamino]ethyl-(2-methoxyethyl)-methyl-amine	4.2945	-1	-1		C13H30N2O4	Trialkylamines	NPMTUMGNJAJXES-UHFFFAOYSA-N	O(C)CCOCCOCCNCCN(C)CCOC
159	3,4-diamino-3,4-bis(2-hydroxy-1-methyl-ethyl)-2-methyl-hexane-1,5-diol	4.2935	-1	-1		C13H30N2O4		NFEYPAZDERYJLB-UHFFFAOYSA-N	OCC(C)C(N)(C(O)C)C(N)(C(C)CO)C(C)CO
160	4,5-diamino-4-(1-hydroxyethyl)-5-(2-hydroxypropyl)octane-2,7-diol	4.2934	-1	-1		C13H30N2O4	1,3-aminoalcohols	SIIVORIDMSPHQO-UHFFFAOYSA-N	OC(C)CC(N)(CC(O)C)C(N)(CC(O)C)C(O)C
161	1-[[bis(2-hydroxypropyl)amino]methyl-(2-hydroxypropyl)amino]propan-2-ol	4.2926	-1	-1		C13H30N2O4	Secondary alcohols	LFNPZZOLLBYZBP-UHFFFAOYSA-N	OC(C)CN(CN(CC(O)C)CC(O)C)CC(O)C
162	4,5-diamino-4-(2-hydroxyethyl)-5-(2-hydroxypropyl)octane-2,7-diol	4.2913	-1	-1		C13H30N2O4	1,3-aminoalcohols	GXCZTRVTZAENEX-UHFFFAOYSA-N	OCCC(N)(CC(O)C)C(N)(CC(O)C)CC(O)C
163	2-[2-[2-[2-(2-methoxyethoxy)ethoxy]ethylamino]ethoxy]ethyl-dimethyl-amine	4.2909	-1	-1		C13H30N2O4	Trialkylamines	PJTURFHPIDVRPB-UHFFFAOYSA-N	O(C)CCOCCOCCNCCOCCN(C)C
164	3-[3-[bis(2-hydroxyethyl)amino]propyl-(3-hydroxypropyl)amino]propan-1-ol	4.2844	-1	-1		C13H30N2O4		YGYLHXHEJWPOMO-UHFFFAOYSA-N	OCCN(CCO)CCCN(CCCO)CCCO
165	4,5-diamino-4-(2-hydroxyethyl)-5-(3-hydroxypropyl)octane-1,8-diol	4.2702	-1	-1		C13H30N2O4		XKNTWBLJNMVPKN-UHFFFAOYSA-N	OCCCC(N)(CCO)C(N)(CCCO)CCCO
166	4-[2-(2-aminoethylamino)ethylamino]-3-[bis(2-hydroxyethyl)amino]butan-1-ol	4.2462	-1	-1		C12H30N4O3	1,3-aminoalcohols	FXAYQZFYDQBBGY-UHFFFAOYSA-N	OCCN(CCO)C(CNCCNCCN)CCO
167	3-[2-[2-hydroxyethyl(3-hydroxypropyl)amino]ethyl-(3-hydroxypropyl)amino]propan-1-ol	4.2373	-1	-1		C13H30N2O4	1,3-aminoalcohols	NNZHIHXNIKLVHS-UHFFFAOYSA-N	OCCN(CCN(CCCO)CCCO)CCCO
168	[2-amino-1-(aminomethyl)-4-[2-[2-(3-aminopropoxy)ethoxy]ethoxy]butyl]amine	4.2226	-1	-1		C12H30N4O3		FVARWMJHIAKPDO-UHFFFAOYSA-N	O(CCOCCCN)CCOCCC(N)C(N)CN
169	2-(2-ethoxyethoxy)ethyl-[2-[2-[2-(methylamino)ethoxy]ethoxy]ethyl]amine	4.2017	-1	-1		C13H30N2O4		NTXDZTMDHYECGE-UHFFFAOYSA-N	O(CC)CCOCCNCCOCCOCCNC
170	N-[2-[2-(2-aminoethoxy)ethoxy]ethyl]carbamic acid tert-butyl ester;ethane	4.1849	-1	-1		C13H30N2O4		SAGDKVJBZHPIJY-UHFFFAOYSA-N	O=C(OC(C)(C)C)NCCOCCOCCN.CC
171	2-[[3-[bis(2-hydroxyethyl)amino]-2,2-dimethyl-propyl]-(2-hydroxyethyl)amino]ethanol	4.1816	-1	-1		C13H30N2O4	1,2-aminoalcohols	UULHSHUCGGZPCJ-UHFFFAOYSA-N	OCCN(CCO)CC(C)(C)CN(CCO)CCO
172	2-[5-[bis(2-hydroxyethyl)amino]pentyl-(2-hydroxyethyl)amino]ethanol	4.1693	-1	-1		C13H30N2O4		AQQPVMHJBLFMJL-UHFFFAOYSA-N	OCCN(CCO)CCCCCN(CCO)CCO
173	ethane;N-[2-(2-hydroxyethylamino)-2-keto-ethyl]carbamic acid tert-butyl ester	4.0886	-1	-1		C13H30N2O4		VNXLMKNCQFHXPK-UHFFFAOYSA-N	O=C(OC(C)(C)C)NCC(=O)NCCO.CC.CC
174	methoxymethoxymethyl-methyl-[4-[methyl(3-methylperoxypropyl)amino]butyl]amine	4.0749	-1	-1		C13H30N2O4		WPXWPCJUHWSDEN-UHFFFAOYSA-N	O(OCCCN(C)CCCCN(C)COCOC)C
175	2-[1-[bis[1-(2-hydroxyethylamino)ethyl]amino]ethylamino]ethanol	4.0485	-1	-1		C12H30N4O3	Aminals	KSGZKTMRQLKRQU-UHFFFAOYSA-N	OCCNC(N(C(NCCO)C)C(NCCO)C)C
176	1-[1-[bis[1-(1-hydroxyethylamino)ethyl]amino]ethylamino]ethanol	4.0143	-1	-1		C12H30N4O3	Hemiaminals	ZRHRTJCHYZJYMZ-UHFFFAOYSA-N	OC(NC(N(C(NC(O)C)C)C(NC(O)C)C)C)C
177	O-[1-[9-(1-aminooxyethoxy)nonoxy]ethyl]hydroxylamine	3.9932	-1	-1		C13H30N2O4		AEXFCXMFWLRKMZ-UHFFFAOYSA-N	O(N)C(OCCCCCCCCCOC(ON)C)C
178	diammonium;2-decylmalonate	3.9896	-1	-1		C13H30N2O4	Medium-chain fatty acids	KBKHZUWNFHPYKG-UHFFFAOYSA-N	O=C([O-])C(C(=O)[O-])CCCCCCCCCC.[NH4+].[NH4+]
179	2-[2-[bis[2-(2-hydroxyethylamino)ethyl]amino]ethylamino]ethanol	3.9859	-1	-1		C12H30N4O3	1,2-aminoalcohols	FBMASIMMWVQRRC-UHFFFAOYSA-N	OCCNCCN(CCNCCO)CCNCCO
180	diammonium;2,2,8,8-tetramethylazelaate	3.9334	-1	-1		C13H30N2O4	Medium-chain fatty acids	YBZFWPCJNSAVMN-UHFFFAOYSA-N	O=C([O-])C(C)(C)CCCCCC(C(=O)[O-])(C)C.[NH4+].[NH4+]
181	ethane;(2S)-2-(glycylamino)propionic acid methyl ester;2-methoxy-2-methyl-propane	3.7803	-1	-1		C13H30N2O4		DAVZIYXJMOWMMY-FHNDMYTFSA-N	O=C(OC)C(NC(=O)CN)C.O(C)C(C)(C)C.CC
182	diammonium;brassylate	3.7709	-1	-1		C13H30N2O4		UFQFRLHKBDQJMI-UHFFFAOYSA-N	O=C([O-])CCCCCCCCCCCC(=O)[O-].[NH4+].[NH4+]
183	itaconic acid;tetramethylammonium	3.73	-1	-1		C13H30N2O4	Branched fatty acids	MPCMNCUFYRHEON-UHFFFAOYSA-N	O=C(O)C(=C)CC(=O)O.C[N+](C)(C)C.C[N+](C)(C)C
184	azelaate;dimethylammonium	3.7292	-1	-1		C13H30N2O4	Medium-chain fatty acids	QZGQCZHJYZBMHT-UHFFFAOYSA-N	O=C([O-])CCCCCCCC(=O)[O-].C[NH2+]C.C[NH2+]C
185	2-[butyl(2-hydroxyethyl)amino]ethanol;2-(trimethylammonio)acetate	3.7135	-1	-1		C13H30N2O4		KKTVACIODAKTSH-UHFFFAOYSA-N	O=C([O-])C[N+](C)(C)C.OCCN(CCO)CCCC
186	6-aminohexanoic acid methyl ester;formamide;2-methoxy-2-methyl-propane	3.7066	-1	-1		C13H30N2O4		QKZGPJKKSNMVRG-UHFFFAOYSA-N	O=CN.O=C(OC)CCCCCN.O(C)C(C)(C)C
187	diethylammonium;2,2-dimethylmalonate	3.7024	-1	-1		C13H30N2O4		NLTWLDLEDMLLHX-UHFFFAOYSA-N	O=C([O-])C(C(=O)[O-])(C)C.CC[NH2+]CC.CC[NH2+]CC
188	2-ethylmalonate;tetramethylammonium	3.693	-1	-1		C13H30N2O4	Branched fatty acids	WJGHPEHBIPHJBF-UHFFFAOYSA-L	O=C([O-])C(C(=O)[O-])CC.C[N+](C)(C)C.C[N+](C)(C)C
189	2-methylsuccinate;tetramethylammonium	3.693	-1	-1		C13H30N2O4	Methyl-branched fatty acids	YFRIQISBVYOOHW-UHFFFAOYSA-L	O=C([O-])CC(C(=O)[O-])C.C[N+](C)(C)C.C[N+](C)(C)C
190	diethylammonium;glutarate	3.6787	-1	-1		C13H30N2O4	Dicarboxylic acids and derivatives	VQTWSVGSVFAHNL-UHFFFAOYSA-N	O=C([O-])CCCC(=O)[O-].CC[NH2+]CC.CC[NH2+]CC
191	2,2-dimethylmalonate;tetramethylammonium	3.6787	-1	-1		C13H30N2O4	Dicarboxylic acids and derivatives	FYZIRRUQNPWLFX-UHFFFAOYSA-L	O=C([O-])C(C(=O)[O-])(C)C.C[N+](C)(C)C.C[N+](C)(C)C
192	glutarate;tetramethylammonium	3.6559	-1	-1		C13H30N2O4	Dicarboxylic acids and derivatives	DAWOHZAHJZYSCK-UHFFFAOYSA-L	O=C([O-])CCCC(=O)[O-].C[N+](C)(C)C.C[N+](C)(C)C
193	ethyl(trimethyl)ammonium;malonate	3.6559	-1	-1		C13H30N2O4		QYCLSJNQFWQPAW-UHFFFAOYSA-L	O=C([O-])CC(=O)[O-].CC[N+](C)(C)C.CC[N+](C)(C)C
194	trimethyl-[3-(trimethylammonio)propyl]ammonium;diacetate	3.6408	-1	-1		C13H30N2O4	Tetraalkylammonium salts	KFHZCBHFXFKUOB-UHFFFAOYSA-L	O=C([O-])C.O=C([O-])C.C[N+](C)(C)CCC[N+](C)(C)C
195	3-(3-aminopropylamino)propan-1-ol;2,6-diaminohexanoic acid	3.5203	-1	-1		C12H30N4O3		YYMMVSUZZDUUAU-UHFFFAOYSA-N	O=C(O)C(N)CCCCN.OCCCNCCCN
196	2-[2-aminoethyl(2-hydroxyethyl)amino]ethanol;2-piperazinoethanol	3.4658	-1	-1		C12H30N4O3		DCBXNLLLMGCITB-UHFFFAOYSA-N	OCCN(CCO)CCN.OCCN1CCNCC1
197		-1	-1	-1		C8H26N10O
198		-1	-1	-1		C9H26N8O2

## Sheet: Compound4
File path: C:\Users\yilu\Downloads\Data from laptop\Software_Yi\MSFINDER ver 3.50\MSDIAL_TEMP\2020_7_18_156_LBORN0247_BB7_01_22438_40_9.76_329.25.mat
File name: 2020_7_18_156_LBORN0247_BB7_01_22438_40_9.76_329.25
Title: Unknown
MS1 count: 3296
MSMS count: 211
PRECURSORMZ: 329.2477
PRECURSORTYPE: [M+H]+
Intensity: -1
Retention time: 9.762567
Retention index: 0
Rank	Formula	Mass	Mass error	Score	Resources
1	C22H32O2	328.24	-0.0001933	4.379	HMDB,KNApSAcK,ChEBI,DrugBank,SMPDB,T3DB,FooDB,STOFF,BMDB,LipidMAPS,Urine,Feces,CSF,Serum,PubChem,PlantCyc,UNPD,BLEXP,MINE
2	C14H36N2O4S	328.24	-0.0008449	3.495
3	C17H32N2O4	328.236	-0.004216	3.413
4	C10H32N8O2S	328.237	-0.0035303	3.333
5	C11H33N6O3P	328.235	-0.005248	3.304
6	C7H28N12O3	328.241	0.0003092	3.302
7	C16H32N4O3	328.247	0.0070173	3.263
8	C12H28N10O	328.245	0.004332	3.233
9	C13H28N8O2	328.234	-0.0069014	3.22
10	C10H33N8O2P	328.246	0.0059854	3.203
11	C19H36O2S	328.244	0.0031778	3.19
12	C15H32N6S	328.241	0.0004925	3.176
13	C18H28N6	328.238	-0.0028787	3.127
14	C14H37N2O2PS	328.231	-0.0090875	3.101
15	C13H36N4OS2	328.233	-0.0073698	3.082
16	C12H36N6S2	328.244	0.0038636	3.065
17	C9H32N10OS	328.248	0.0077031	3.026
18	C16H40O2S2	328.247	0.006549	3.01
19	C9H24N14	328.231	-0.0095868	2.749
20	C13H44S4	328.233	-0.0078381	2.62
File path: C:\Users\yilu\Downloads\Data from laptop\Software_Yi\MSFINDER ver 3.50\MSDIAL_TEMP\2020_7_18_156_LBORN0247_BB7_01_22438_40_9.76_329.25.mat
File name: 2020_7_18_156_LBORN0247_BB7_01_22438_40_9.76_329.25
Title: Unknown
MS1 count: 3296
MSMS count: 211
PRECURSORMZ: 329.2477
PRECURSORTYPE: [M+H]+
Intensity: -1
Retention time: 9.762567
Retention index: 0
Rank	Title	Score	Retention time	Retention index	Resources	Formula	Ontology	InChIKey	SMILES
1	Docosahexaenoic acid	7.8948	-1	-1	HMDB=HMDB0002183;HMDB0062579,ChEBI=CHEBI:28125;CHEBI:77016,DrugBank=DB03756,SMPDB=PW_C001472,FooDB=FDB003003,BMDB=BMDB02183,LipidMAPS=LMFA01030185;LMFA01030762,Urine=HMDB0002183,Feces=HMDB0002183,CSF=HMDB0002183,Serum=HMDB0002183,PubChem=40486925;25244763;445580,PlantCyc=CPD-10244,UNPD=UNPD193293;UNPD37115,BLEXP=BLEXPDB00000003144	C22H32O2	Very long-chain fatty acids	MBMBGCFOFBJSGT-KUBAVDMBSA-N	O=C(O)CCC=CCC=CCC=CCC=CCC=CCC=CCC
2	Retinol acetate	7.5309	-1	-1	HMDB=HMDB0035185,ChEBI=CHEBI:32095;CHEBI:94695,T3DB=T3D4910,FooDB=FDB013829,STOFF=STOFF_5541,LipidMAPS=LMPR01090012,UNPD=UNPD5210,BLEXP=BLEXPDB00000005057	C22H32O2	Retinoids	QGNJRVVDBSJHIZ-AQDFTDIISA-N	O=C(OCC=C(C=CC=C(C=CC1=C(C)CCCC1(C)C)C)C)C
3	Uvarisesquiterpene A	7.5129	-1	-1	KNApSAcK=C00012407,UNPD=UNPD111974	C22H32O2	Sesquiterpenoids	PHENPXQNEKYPGI-GXDHUFHONA-N	OC1(C)CCC(C=CC2(OC=3C=CC=CC3CC2CC1)C)C(C)C
4	5-(pentadeca-8,11,14-trien-1-yl)resorcinol monomethyl ether	7.3824	-1	-1	ChEBI=CHEBI:52681,PubChem=25244188,PlantCyc=CPD-10257	C22H32O2	Methoxyphenols	GKGSHNPKQBMHTD-AFJQJTPPSA-N	OC=1C=C(OC)C=C(C1)CCCCCCCC=CCC=CCC=C
5	(Z,Z)-2-Methyl-5-(8,11,14-pentadecatrienyl)-1,3-benzenediol	7.313	-1	-1	HMDB=HMDB0038908,FooDB=FDB018372,UNPD=UNPD170690	C22H32O2	Resorcinols	UKMBKJYRCZVQFL-NKEWZBFXSA-N	OC=1C=C(C=C(O)C1C)CCCCCCCC=CCC=CCC=C
6	Uvarisesquiterpene C;1,2,3,3a,4,5,5a,6,11a,11b-Decahydro-3a,11a-dimethyl-a-(1-methylethyl)-cyclopenta[c]xanthene-1-methanol	7.3076	-1	-1	KNApSAcK=C00013558,UNPD=UNPD130477	C22H32O2	Sesquiterpenoids	DVQKSIMSTILIJZ-UHFFFAOYNA-N	OC(C(C)C)C1CCC2(C)CCC3CC=4C=CC=CC4OC3(C)C12
7	Grifolin	7.2954	-1	-1	HMDB=HMDB0030446,KNApSAcK=C00023937,FooDB=FDB002311,UNPD=UNPD151320,BLEXP=BLEXPDB00005372312	C22H32O2	Sesquiterpenoids	PZHNKNRPGLTZPO-VZRGJMDUSA-N	OC=1C=C(C=C(O)C1CC=C(C)CCC=C(C)CCC=C(C)C)C
8	Neogrifolin	7.2954	-1	-1	HMDB=HMDB0030053,KNApSAcK=C00023938,FooDB=FDB001359,UNPD=UNPD28913;UNPD226791,BLEXP=BLEXPDB00009874426	C22H32O2	Sesquiterpenoids	JWDIUXFSIWOGDP-VZRGJMDUSA-N	OC=1C=C(O)C(=C(C1)C)CC=C(C)CCC=C(C)CCC=C(C)C
9	promestriene	7.2259	-1	-1	ChEBI=CHEBI:135402,BLEXP=BLEXPDB00000071717	C22H32O2	Estrane steroids	IUWKNLFTJBHTSD-GGPMZWGENA-N	O(C1=CC=C2C(=C1)CCC3C2CCC4(C)C(OC)CCC34)CCC
10	Piperogalin	7.1681	-1	-1	KNApSAcK=C00042858,UNPD=UNPD148825	C22H32O2	Aromatic monoterpenoids	XGLWDZCGSBTQLD-GZTJUZNOSA-N	OC=1C=C(C(=C(O)C1CC=C(C)CCC=C(C)C)CC=C(C)C)C
11	[(2E,4E,6E,8E)-3,7-dimethyl-9-(2,6,6-trimethylcyclohex-2-en-1-yl)nona-2,4,6,8-tetraenyl] acetate	7.1319	-1	-1	BLEXP=BLEXPDB00006441065	C22H32O2	Retinoids	LIMNLJYOCLMDIH-QHLGVNSISA-N	O=C(OCC=C(C=CC=C(C=CC1C(=CCCC1(C)C)C)C)C)C
12	2-methyl-6-farnesyl-1,4-benzoquinol	7.1266	-1	-1	PlantCyc=CPD-11714,UNPD=UNPD161293	C22H32O2	Sesquiterpenoids	CMIAQOJJEOLRAQ-VZRGJMDUSA-N	OC=1C=C(C(O)=C(C1)CC=C(C)CCC=C(C)CCC=C(C)C)C
13	6alpha-Methylprogesterone	7.1189	-1	-1	ChEBI=CHEBI:34476,BLEXP=BLEXPDB00000092847	C22H32O2	Gluco/mineralocorticoids, progestogins and derivatives	GNFABWAPJFOZSF-KTORGGLSSA-N	O=C1C=C2C(C)CC3C(CCC4(C)C(C(=O)C)CCC34)C2(C)CC1
14	acetic acid [(4bS)-4b,8,8-trimethyl-1-propan-2-yl-5,6,7,8a,9,10-hexahydrophenanthren-2-yl] ester	7.1146	-1	-1	ChEBI=CHEBI:110202,UNPD=UNPD87000	C22H32O2	Diterpenoids	ORVBSFQTFRBNRP-HSQDRTMGNA-N	O=C(OC1=CC=C2C(=C1C(C)C)CCC3C2(C)CCCC3(C)C)C
15	10,13,16-Docosatriynoic acid	7.109	-1	-1	LipidMAPS=LMFA01030685	C22H32O2	Very long-chain fatty acids	QPBINMRNALMRNT-UHFFFAOYSA-N	O=C(O)CCCCCCCCC#CCC#CCC#CCCCCC
16	2alpha-Methylpregn-4-ene-3,20-dione	7.0897	-1	-1	ChEBI=CHEBI:79635	C22H32O2	Gluco/mineralocorticoids, progestogins and derivatives	SGQKAJDGWMDIOH-YJIAGASKSA-N	O=C1C=C2CCC3C(CCC4(C)C(C(=O)C)CCC34)C2(C)CC1C
17	7alpha-Methyl-4-pregnene-3,20-dione	7.0612	-1	-1	ChEBI=CHEBI:79801	C22H32O2	Gluco/mineralocorticoids, progestogins and derivatives	ZJTSNYHPKIGSEQ-WYVJSDDNSA-N	O=C1C=C2CC(C)C3C(CCC4(C)C(C(=O)C)CCC34)C2(C)CC1
18	16beta-methylpregn-4-ene-3,20-dione	7.0602	-1	-1	ChEBI=CHEBI:79767	C22H32O2	Gluco/mineralocorticoids, progestogins and derivatives	JYYRDDFNMDZIIP-FHFOHXTPNA-N	O=C1C=C2CCC3C(CCC4(C)C(C(=O)C)C(C)CC34)C2(C)CC1
19	8,11,14-Docosatriynoic acid	7.0431	-1	-1	LipidMAPS=LMFA01030684	C22H32O2	Very long-chain fatty acids	DSPYHXFXVLHAIZ-UHFFFAOYSA-N	O=C(O)CCCCCCC#CCC#CCC#CCCCCCCC
20	3,9,15-Docosatriynoic acid	7.0229	-1	-1	LipidMAPS=LMFA01030683	C22H32O2	Very long-chain fatty acids	CMTSTCUCQFCZHU-UHFFFAOYSA-N	O=C(O)CC#CCCCCC#CCCCCC#CCCCCCC
21	(4E,6E,8E,10E,12E,19E)-docosa-4,6,8,10,12,19-hexaenoic acid	7.0065	-1	-1	BLEXP=BLEXPDB00129636023	C22H32O2	Very long-chain fatty acids	LPJLKHLRMXTURJ-ZUFKVLHZSA-N	O=C(O)CCC=CC=CC=CC=CC=CCCCCCC=CCC
22	docosa-2,4,6,8,10,12-hexaenoic acid	6.8896	-1	-1	BLEXP=BLEXPDB00000175542;BLEXPDB00006442063	C22H32O2	Very long-chain fatty acids	DVSZKTAMJJTWFG-UHFFFAOYSA-N	O=C(O)C=CC=CC=CC=CC=CC=CCCCCCCCCC
23	UNPD56900	6.7214	-1	-1	UNPD=UNPD56900	C22H32O2	Bicyclic monoterpenoids	IZABSJRYMPZMIH-QSAWOSSKNA-N	OC=1C=C(C=C2OC(C)(CCC=C(C)CCC=C(C)C)CCC12)C
24	UNPD111228	6.7214	-1	-1	UNPD=UNPD111228;UNPD220271	C22H32O2	Bicyclic monoterpenoids	OJZATKPMGAGZGS-QSAWOSSKNA-N	OC=1C=C(C=2OC(C)(CCC=C(C)CCC=C(C)C)CCC2C1)C
25	UNPD50358	6.6724	-1	-1	UNPD=UNPD50358	C22H32O2	Aromatic monoterpenoids	IPGGELGANIXRSX-QINVSXPYNA-N	OC=1C=C(C=C(OC)C1C2C=C(C)CCC2C(=C)C)CCCCC
26	UNPD199624	6.6506	-1	-1	UNPD=UNPD199624	C22H32O2	Carboxylic acids	XFWHQKHISXGFRZ-VNCXEOHSNA-N	O=C(O)C1C=CC2CC3C(CCCCCCCC)C4C=CC1C2C43
27	UNPD199625	6.6295	-1	-1	UNPD=UNPD199625	C22H32O2	Carboxylic acids	SIZPQNDPGQODBP-QFIPHOCHNA-N	O=C(O)C1=CCC2CC3C(CCCCCCCC)C4C=CC1C2C43
28	UNPD41657	6.6273	-1	-1	UNPD=UNPD41657	C22H32O2	Fluorenes	BOKAOWALBQCATC-MXOFVIGZNA-N	OC=1C(=CC=C2C1C3(C)CCC4C(C)(C)C(O)CCC4(C)C3C2)C
29	UNPD190269	6.5787	-1	-1	UNPD=UNPD190269	C22H32O2	Hydroquinones	TXJPJZWNYUQWCP-QEZHZVPONA-N	OC1=CC=C(O)C(=C1)CC2(C)C(C)CCC3(C(=CCCC32C)C)C
30	UNPD64245	6.5314	-1	-1	UNPD=UNPD64245	C22H32O2	Fluorenes	QLLVZMNPEACNBC-JBNQBDGBNA-N	OC=1C(=CC=C2C1C3(C)CCC4C(C)(CO)CCCC4(C)C3C2)C
31	UNPD13647	6.415	-1	-1	UNPD=UNPD13647	C22H32O2	Very long-chain fatty acids	GZJLLYHBALOKEX-OZSJGBHKSA-N	O=C(O)CCCC=CCC=CCC=CCC=CCC=CCC=CC
32	UNPD207322	6.4137	-1	-1	UNPD=UNPD207322	C22H32O2	Sesquiterpenoids	PPRBUIHMPCALQT-GZTJUZNOSA-N	OC=1C=C(C(=C(O)C1CC=C(C)C)CC=C(C)CCC=C(C)C)C
33	UNPD207411	6.4036	-1	-1	UNPD=UNPD207411;UNPD97095;UNPD218707	C22H32O2	Resorcinols	KCBMJUBUDHKQOU-TVYVBBRWSA-N	OC=1C=C(C=C(O)C1C)CC=CCC=CCCCCCCCC=C
34	UNPD131300	6.4001	-1	-1	UNPD=UNPD131300	C22H32O2	Sesquiterpenoids	OTQYXSRTAPOZDP-DFNKSRCDNA-N	O(C1=CC=C2OC3(C)CCC4CC(C)(C)CCC4(C)C3CC2=C1)C
35	UNPD104159	6.3792	-1	-1	UNPD=UNPD104159	C22H32O2	Phenylpropenes	NRKPQDAKPVCBIF-FXBPSFAMSA-N	O=C(C(=C(O)CC1=CC(=CC(=C1)C(C)C)C(=C(C)C)C)C)C(C)C
36	UNPD144029	6.3713	-1	-1	UNPD=UNPD144029	C22H32O2	Diterpenoids	WIPBCBTWUKPWAM-GIVMULKXNA-N	O=C(OC1CC2(C3=CC=C(C=C3CCC2C(C)(C)C1)C(C)C)C)C
37	UNPD30070	6.3551	-1	-1	UNPD=UNPD30070	C22H32O2	Diterpenoids	CGCMREBLRQFVLX-ALDFUXCCNA-N	O=C(OC1CCC2(C3=CC=C(C=C3CCC2C1(C)C)C(C)C)C)C
38	UNPD129751	6.3487	-1	-1	UNPD=UNPD129751	C22H32O2	Oxosteroids	BGCRSCGGUIQXDO-KNTPPBLBNA-N	O=C1C2=CCC3C4(C)CCC(=O)C(C)(C)C4CCC3(C)C2(C)CC1
39	UNPD107542	6.3198	-1	-1	UNPD=UNPD107542	C22H32O2	Sesquiterpenoids	WMICYZWXGIMHIB-VZRGJMDUSA-N	OC1=CC(=C(O)C=C1C)CC=C(C)CCC=C(C)CCC=C(C)C
40	UNPD88473	6.3179	-1	-1	UNPD=UNPD88473	C22H32O2	Very long-chain fatty acids	NTZNSLMJTZWQSZ-OWJWYREGSA-N	O=C(O)CCC=CCCC=CCCC=CCC=CCC=CCC=C
41	UNPD19222	6.3078	-1	-1	UNPD=UNPD19222	C22H32O2	Diterpenoids	AZEPENWNEVUZPW-HJWBXKIQNA-N	O=C(OC=1C=C2C(=CC1C(C)C)CCC3C2(C)CCCC3(C)C)C
42	UNPD54361	6.3078	-1	-1	UNPD=UNPD54361	C22H32O2	Diterpenoids	GOFVGQQVAVJCMR-HJWBXKIQNA-N	O=C(OC=1C=C2C(=CC1C(C)C)C3(C)CCCC(C)(C)C3CC2)C
43	UNPD186161	6.2895	-1	-1	UNPD=UNPD186161;UNPD52582;UNPD5328	C22H32O2	Diterpenoids	SNKPCSRNBVWIIG-MMQGKVKMNA-N	O=C(OCC1(C)CCCC2(C3=CC=C(C=C3CCC21)C(C)C)C)C
44	UNPD127285	6.2604	-1	-1	UNPD=UNPD127285	C22H32O2	Diterpenoids	LMNZSAWWQSPBNF-PXLAXKNCNA-N	O=C(OC(C1=CC=C2C(=C1)CCC3C2(C)CCCC3(C)C)(C)C)C
45		-1	-1	-1		C10H32N8O2S
46		-1	-1	-1		C11H33N6O3P
47		-1	-1	-1		C14H36N2O4S
48		-1	-1	-1		C17H32N2O4

## Sheet: Compound 5
File path: C:\Users\yilu\Downloads\Data from laptop\Software_Yi\MSFINDER ver 3.50\MSDIAL_TEMP\2020_7_18_158_LBORN0249_BC1_01_22440_123_9.92_305.25.mat
File name: 2020_7_18_158_LBORN0249_BC1_01_22440_123_9.92_305.25
Title: Unknown
MS1 count: 4962
MSMS count: 141
PRECURSORMZ: 305.248
PRECURSORTYPE: [M+H]+
Intensity: -1
Retention time: 9.919567
Retention index: 0
Rank	Formula	Mass	Mass error	Score	Resources
1	Spectral DB search	-1	0	5
2	C20H32O2	304.24	-0.0004933	4.422	HMDB,KNApSAcK,ChEBI,DrugBank,SMPDB,T3DB,FooDB,NANPDB,STOFF,BMDB,LipidMAPS,Urine,Saliva,Feces,CSF,Serum,PubChem,PlantCyc,UNPD,BLEXP,MINE
3	C15H32N2O4	304.236	-0.004516	3.299
4	C10H28N10O	304.245	0.004032	3.21
5	C14H32N4O3	304.247	0.0067173	3.202
6	C17H36O2S	304.244	0.0028778	3.199
7	C13H32N6S	304.241	0.0001925	3.176
8	C11H28N8O2	304.234	-0.0072014	3.135
9	C16H28N6	304.238	-0.0031787	3.114
10	C10H36N6S2	304.244	0.0035636	3.069
11	C11H36N4OS2	304.233	-0.0076698	3.037
12	C7H24N14	304.231	-0.0098868	2.696
File path: C:\Users\yilu\Downloads\Data from laptop\Software_Yi\MSFINDER ver 3.50\MSDIAL_TEMP\2020_7_18_158_LBORN0249_BC1_01_22440_123_9.92_305.25.mat
File name: 2020_7_18_158_LBORN0249_BC1_01_22440_123_9.92_305.25
Title: Unknown
MS1 count: 4962
MSMS count: 141
PRECURSORMZ: 305.248
PRECURSORTYPE: [M+H]+
Intensity: -1
Retention time: 9.919567
Retention index: 0
Rank	Title	Score	Retention time	Retention index	Resources	Formula	Ontology	InChIKey	SMILES
1	Arachidonic acid	8.1744	-1	-1	HMDB=HMDB0001043;HMDB0060102,KNApSAcK=C00000388,ChEBI=CHEBI:15843;CHEBI:32395;CHEBI:36306,DrugBank=DB04557,SMPDB=PW_C000821,FooDB=FDB011872,BMDB=BMDB01043,LipidMAPS=LMFA01030001;LMFA01030003;LMFA01030393;LMFA01030817,Urine=HMDB0001043,Saliva=HMDB0001043,Feces=HMDB0001043,CSF=HMDB0001043,Serum=HMDB0001043;HMDB0060102,PubChem=5460265;444899,PlantCyc=ARACHIDONIC_ACID,UNPD=UNPD1153;UNPD128376;UNPD841…	C20H32O2	Long-chain fatty acids	YZXBAPSDXZZRGB-DOFZRALJSA-N	O=C(O)CCCC=CCC=CCC=CCC=CCCCCC
2	Cis-8,11,14,17-Eicosatetraenoic acid	7.8373	-1	-1	HMDB=HMDB0002177,ChEBI=CHEBI:71488;CHEBI:71563,SMPDB=PW_C001466,FooDB=FDB022887,BMDB=BMDB02177,LipidMAPS=LMFA01030176;LMFA01030818,Serum=HMDB0002177,PubChem=25244091,PlantCyc=CPD-8121,UNPD=UNPD124019;UNPD172475	C20H32O2	Long-chain fatty acids	HQPCSDADVLFHHO-LTKCOYKYSA-N	O=C(O)CCCCCCC=CCC=CCC=CCC=CCC
3	Oryzalexin E	7.7256	-1	-1	HMDB=HMDB0039702,KNApSAcK=C00034093,ChEBI=CHEBI:78259,FooDB=FDB019331,PubChem=86289490,UNPD=UNPD155337;UNPD43512;UNPD6430	C20H32O2	Hydrophenanthrenes	RGLTYROISYBKIW-KMVMXGJHNA-N	OC1CCC2(C)C(CCC3=CC(C=C)(C)CCC32O)C1(C)C
4	Oryzalexin F	7.653	-1	-1	KNApSAcK=C00034094,ChEBI=CHEBI:69238,FooDB=FDB001860,NANPDB=NANPDB_5004,UNPD=UNPD111915;UNPD143299;UNPD181673;UNPD27639;UNPD33602;UNPD38349;UNPD46221;UNPD81965;UNPD97538	C20H32O2	Diterpenoids	OJSKJQFODPKTBT-UCHHLAQSNA-N	OCC1(C)C(O)CCC2(C)C3C(=CC(C=C)(C)CC3)CCC12
5	Copalic acid	7.6523	-1	-1	HMDB=HMDB0036829,KNApSAcK=C00022761;C00036931,FooDB=FDB015778,UNPD=UNPD142593;UNPD182552;UNPD56842;UNPD92007,BLEXP=BLEXPDB00011162521	C20H32O2	Diterpenoids	JFQBNOIJWROZGE-YPKPFQOONA-N	O=C(O)C=C(C)CCC1C(=C)CCC2C(C)(C)CCCC12C
6	7,13-Eperudien-15-oic acid	7.6413	-1	-1	HMDB=HMDB0037824,KNApSAcK=C00022756,FooDB=FDB016972,UNPD=UNPD134018;UNPD164724;UNPD179712	C20H32O2	Diterpenoids	YUYHINCTHBQFIT-YPKPFQOONA-N	O=C(O)C=C(C)CCC1C(=CCC2C(C)(C)CCCC12C)C
7	Dihydroabietic acid	7.6169	-1	-1	ChEBI=CHEBI:81383,STOFF=STOFF_3042,BLEXP=BLEXPDB00000227277	C20H32O2	Diterpenoids	BTAURFWABMSODR-NZODBCNPSA-N	O=C(O)C1(C)CCCC2(C)C3C(=CC(CC3)C(C)C)CCC12
8	Drostanolone	7.6078	-1	-1	HMDB=HMDB0014996,ChEBI=CHEBI:34838,DrugBank=DB00858,T3DB=T3D2917,Urine=HMDB0014996,Serum=HMDB0014996,BLEXP=BLEXPDB00000006011	C20H32O2	Androgens and derivatives	IKXILDNPCZPPRV-RFMGOVQKSA-N	O=C1CC2CCC3C4CCC(O)C4(C)CCC3C2(C)CC1C
9	Acutilol A	7.6077	-1	-1	KNApSAcK=C00003399,ChEBI=CHEBI:2451,LipidMAPS=LMPR0104470001,UNPD=UNPD140872;UNPD41173	C20H32O2	Pachydictyane and cneorubin diterpenoids	YBQDGKYVLDZIDN-UHEWVMETNA-N	OC1C2C(=CCC2=C(C)CCC1C(C)CCC3OC3(C)C)C
10	Mesterolone	7.5985	-1	-1	HMDB=HMDB0006036,ChEBI=CHEBI:135293,FooDB=FDB023812,STOFF=STOFF_5739,BMDB=BMDB06036,LipidMAPS=LMST02020107,BLEXP=BLEXPDB00000015020	C20H32O2	Androgens and derivatives	UXYRZJKIQKRJCF-TZPFWLJSSA-N	O=C1CC(C)C2(C)C(C1)CCC3C4CCC(O)C4(C)CCC32
11	Oryzalexin D;(+)-Oryzalexin D	7.5788	-1	-1	KNApSAcK=C00034092,ChEBI=CHEBI:78256,FooDB=FDB001859,PubChem=86289489	C20H32O2	Diterpenoids	HRWWBCRSPUEXDM-CLJPOHELNA-N	OC1C2=CC(C=C)(C)CCC2C3(C)CCC(O)C(C)(C)C3C1
12	Oryzalexin S	7.5725	-1	-1	HMDB=HMDB0039687,KNApSAcK=C00000889,FooDB=FDB019316,UNPD=UNPD150546	C20H32O2	Stemarane diterpenoids	OXKYBEZXRLIPKC-UHFFFAOYNA-N	OCC1(C)CC(O)CC2(C)C1CCC3C=C(C)C4CCC32C4
13	Sideridiol	7.5662	-1	-1	HMDB=HMDB0036702,KNApSAcK=C00049865,FooDB=FDB015638,UNPD=UNPD173224;UNPD83597;UNPD89852	C20H32O2	Kaurane diterpenoids	BATFJLLEMUIAJD-UHFFFAOYNA-N	OCC1(C)CCCC2(C)C3CCC4C(=CC3(C4)C(O)CC12)C
14	Cistadienic acid	7.5582	-1	-1	KNApSAcK=C00022755,UNPD=UNPD108180;UNPD187921	C20H32O2	Diterpenoids	SFLZWKVLEVEUEM-FGGXPPASNA-N	O=C(O)CC(C)CCC1C(=C)C=CC2C(C)(C)CCCC12C
15	Yucalexin P21	7.5549	-1	-1	HMDB=HMDB0036754,FooDB=FDB015692,UNPD=UNPD25167;UNPD68308;UNPD90836	C20H32O2	Diterpenoids	BXDBZZUQTQKCEI-UHFFFAOYNA-N	OC1CCC2(C)C3C(=CC(C=C)(C)C(O)C3)CCC2C1(C)C
16	sandaracopimaric acid	7.5523	-1	-1	NANPDB=NANPDB_4958,UNPD=UNPD50588	C20H32O2	Diterpenoids	BOZVXNYLOGJCKG-UHFFFAOYSA-N	O=C(O)C1(C)CCCC2(C)C3C(=CC(C)(CC)CC3)CCC12
17	abieta-7,13-dien-18,18-diol	7.5488	-1	-1	ChEBI=CHEBI:63668,FooDB=FDB030643,PubChem=25202380,PlantCyc=CPD-8692	C20H32O2	Diterpenoids	CPTVDNMRGYWJCH-ONCXSQPRSA-N	OC(O)C1(C)CCCC2(C)C3C(C=C(CC3)C(C)C)=CCC12
18	Torulosal;13R-Hydroxy-8(17),14-labdadien-19-al	7.5435	-1	-1	KNApSAcK=C00022720,NANPDB=NANPDB_3439;NANPDB_3479,UNPD=UNPD120183;UNPD123636;UNPD50856;UNPD76231;UNPD97760	C20H32O2	Diterpenoids	GLJXUJMLZHNKJU-VMTQIBTLNA-N	O=CC1(C)CCCC2(C)C(C(=C)CCC12)CCC(O)(C=C)C
19	2-Ketoepimanool	7.5344	-1	-1	KNApSAcK=C00003449,ChEBI=CHEBI:1182,UNPD=UNPD100770;UNPD6461	C20H32O2	Diterpenoids	UPIJHQOLJKUYGG-YDFKPMHZNA-N	O=C1CC(C)(C)C2CCC(=C)C(CCC(O)(C=C)C)C2(C)C1
20	13-Hydroxy-7-oxo-labda-8,14-diene	7.5318	-1	-1	KNApSAcK=C00036414,UNPD=UNPD43099	C20H32O2	Diterpenoids	BSMFVZFQHBDXRF-GEBGKHOLNA-N	O=C1C(=C(CCC(O)(C=C)C)C2(C)CCCC(C)(C)C2C1)C
21	Dehydroopulifolic acid	7.5213	-1	-1	KNApSAcK=C00023515,UNPD=UNPD153250	C20H32O2	Carbocyclic fatty acids	GAHLKTPABPHGAM-VNDLAEGFNA-N	O=C(O)CC(C)CCC1(C)C2C=CC=C(C)C2(C)CCC1C
22	(6Z)-cladiellin (cladiella-6Z,11(17)-dien-3-ol)	7.5142	-1	-1	NANPDB=NANPDB_112,LipidMAPS=LMPR0104210003,UNPD=UNPD89560	C20H32O2	Eunicellane and asbestinane diterpenoids	JRIWYQNERQUJOM-IWAGMHMGSA-N	OC1(C)CCC=C(C)CC2OC1C3C2C(=C)CCC3C(C)C
23	Kolavenic acid	7.506	-1	-1	KNApSAcK=C00023496,UNPD=UNPD105982;UNPD108036;UNPD109383;UNPD150315;UNPD15150;UNPD43068;UNPD230498	C20H32O2	Colensane and clerodane diterpenoids	NLVMTSRTOGOFQD-NLLAJEERNA-N	O=C(O)C=C(C)CCC1(C)C(C)CCC2(C(=CCCC21)C)C
24	13beta-Hydroxy-8,14-labdadien-19-al	7.5051	-1	-1	KNApSAcK=C00022483,UNPD=UNPD175994;UNPD193288	C20H32O2	Diterpenoids	QXSIOZLWDLOGDE-DVGONQDFNA-N	O=CC1(C)CCCC2(C(=C(C)CCC12)CCC(O)(C=C)C)C
25	Isoagatholal	7.4968	-1	-1	KNApSAcK=C00022707,NANPDB=NANPDB_3440,UNPD=UNPD19507;UNPD31276;UNPD58298;UNPD60654;UNPD88847;UNPD216168;UNPD217812	C20H32O2	Diterpenoids	FSLWKIHHQUNBQK-IUEGSBBHNA-N	O=CC1(C)CCCC2(C)C(C(=C)CCC12)CCC(=CCO)C
26	ent-15-Hydroxy-1(10),13E-Halimadiene-2alpha-one	7.4944	-1	-1	KNApSAcK=C00023442,UNPD=UNPD162203	C20H32O2	Fatty alcohols	NSPVQWDBJCPQCW-JBXAMFDCNA-N	O=C1C=C2C(CCC(C)C2(C)CCC(=CCO)C)C(C)(C)C1
27	ent-8(14),15-sandaracopimaradiene-2alpha,18-diol;(+)-ent-8(14),15-sandaracopimaradiene-2alpha,18-diol	7.4943	-1	-1	KNApSAcK=C00037101,UNPD=UNPD143319;UNPD17786;UNPD44255;UNPD62690;UNPD94901	C20H32O2	Diterpenoids	YDCSRZAYXXMRIQ-VLZABGBPNA-N	OCC1(C)CC(O)CC2(C)C3C(=CC(C=C)(C)CC3)CCC12
28	7-Oxo-ent-labda-8,13E-diene-15-ol	7.4922	-1	-1	KNApSAcK=C00022609,UNPD=UNPD84211	C20H32O2	Diterpenoids	LXFMYQUODFUEHM-ABTAECFRNA-N	O=C1C(=C(CCC(=CCO)C)C2(C)CCCC(C)(C)C2C1)C
29	Grandilobatin E;(-)-Grandilobatin E	7.4913	-1	-1	KNApSAcK=C00039295,UNPD=UNPD137146	C20H32O2	Cembrane diterpenoids	GHADJBJUJGZEFC-OREROFFZNA-N	O=C1C=C(C)CCCC(=CC=C(CCC(C)C1)C(O)(C)C)C
30	15-Hydroxy-7,13E-labdadien-6-one	7.4885	-1	-1	KNApSAcK=C00022467,UNPD=UNPD105239	C20H32O2	Diterpenoids	RYPCTVVIBCANOP-PWWFTOFHNA-N	O=C1C=C(C)C(CCC(=CCO)C)C2(C)CCCC(C)(C)C12
31	Polasol A;(+)-Polasol A	7.485	-1	-1	KNApSAcK=C00050198,UNPD=UNPD87303	C20H32O2	Sphenolobane diterpenoids	CTLMPKXXSYQROQ-ILAWPXJCNA-N	O=C1C(=CCC2C(CCC2(C)C1)C(O)(C)CCC=C(C)C)C
32	Virescenol B	7.4836	-1	-1	KNApSAcK=C00000904,NANPDB=NANPDB_5005,UNPD=UNPD150051;UNPD171237;UNPD23439;UNPD40266	C20H32O2	Diterpenoids	NFUDIHFRVVFXHZ-VQOJRVEWNA-N	OCC1(C)C(O)CCC2(C)C3C(=CCC12)CC(C=C)(C)CC3
33	13beta-hydroxyabiet-8(14)-en-7-one	7.4826	-1	-1	NANPDB=NANPDB_3255,UNPD=UNPD36619;UNPD9777	C20H32O2	Diterpenoids	SWTZTWQASUSBIY-BCMWCWJPSA-N	O=C1C2=CC(O)(CCC2C3(C)CCCC(C)(C)C3C1)C(C)C
34	(5S,7R, 8R,9R,10S)-(-)-7,8-seco-7,8-oxacassa-13,15-dien-7-ol	7.4819	-1	-1	ChEBI=CHEBI:69397,UNPD=UNPD193818;UNPD19529;UNPD203173	C20H32O2	Oxepanes	LYHHJTUWLMOJRZ-QGCFSHSANA-N	OC1OC2C(=C(C=C)CCC2C3(C)CCCC(C)(C)C3C1)C
35	Grandilobatin D;(+)-Grandilobatin D	7.476	-1	-1	KNApSAcK=C00039294,UNPD=UNPD129313	C20H32O2	Cembrane diterpenoids	KECRMPBXABTDAG-WBVNPKPZNA-N	O=C1CC(=CCCC(=CC=C(CCC(C)C1)C(O)(C)C)C)C
36	8alpha-hydroxy-13-epi-pimar-16-en-18-yl acetate	7.4746	-1	-1	NANPDB=NANPDB_4966,UNPD=UNPD28689	C20H32O2	Diterpenoids	ABCIEUDQNGOLIV-ZVZPGWEDSA-N	O=CC1(C)CCCC2(C)C3CCC(C=C)(C)CC3(O)CCC12
37	Calcaratarin B;(+)-Calcaratarin B	7.4724	-1	-1	KNApSAcK=C00046632,UNPD=UNPD90355	C20H32O2	Diterpenoids	JSNVJPLVHIOLEM-IFQHFIQYNA-N	O=C(O)CC(=CCC1C(=C)CCC2C(C)(C)CCCC12C)C
38	Candicandiol	7.4706	-1	-1	KNApSAcK=C00034462;C00035512,NANPDB=NANPDB_2803;NANPDB_2804,UNPD=UNPD169456;UNPD176885;UNPD191505	C20H32O2	Kaurane diterpenoids	AMOBKAMJSKCUFH-DLJRAPPPNA-N	OCC1(C)CCCC2(C)C3CCC4C(=C)CC3(C4)C(O)CC12
39	(+)-11,12-Epoxysarcophytol A	7.4632	-1	-1	KNApSAcK=C00038064,UNPD=UNPD58557	C20H32O2	Sesquiterpenoids	NPSBLVCLWPSNIZ-OMSBYEJDNA-N	OC1C(=CC=C(C)CCC=C(C)CCC2OC2(C)C1)C(C)C
40	rel-(1R,4S,6aS,7R,9aR)-1-Hydroxy-7-isopropyl-1,4,9a-trimethyl-1,4,5,6,6a,7,8,9,9a,10-decahydro-2H-dicyclopenta[a,d]cycloocten-3-one	7.4618	-1	-1	ChEBI=CHEBI:67829,UNPD=UNPD200921	C20H32O2	Fusicoccane diterpenoids	NXIQEZUWFNXIFV-OTUFPUCFNA-N	O=C1C2=C(CC3(C)CCC(C(C)C)C3CCC2C)C(O)(C)C1
41	Suremulol B;(-)-Suremulol B	7.46	-1	-1	KNApSAcK=C00043945,UNPD=UNPD112997;UNPD130020;UNPD185183	C20H32O2	Kaurane diterpenoids	JGEIWAWDGKPFTK-AODVOTJMNA-N	OC1C(=C)C2CCC3C4(C)CCC(O)C(C)(C)C4CCC13C2
42	15-Hydroxy-8,13E-labdadien-19-al	7.4597	-1	-1	KNApSAcK=C00022479,UNPD=UNPD105036	C20H32O2	Diterpenoids	BMTOUTMHFDTNPJ-VLEULXGJNA-N	O=CC1(C)CCCC2(C(=C(C)CCC12)CCC(=CCO)C)C
43	Phorbasin H	7.457	-1	-1	KNApSAcK=C00031006,UNPD=UNPD100781;UNPD45622;UNPD209749	C20H32O2	Sesquiterpenoids	GMAZESCNIHSLSB-RMRWVHFPNA-N	O=C(O)C1CCC(C(=CC=CC(C)CCC=C(C)C)C)CC1
44	6beta,18-Dihydroxycassan-13,15-diene	7.4567	-1	-1	KNApSAcK=C00044471,UNPD=UNPD63832	C20H32O2	Isocopalane and spongiane diterpenoids	BRNVYJSCDJWVGQ-VVMYWOLNNA-N	OCC1(C)CCCC2(C)C3CCC(C=C)=C(C)C3CC(O)C12
45	ent-17-Hydroxy-3,13E-clerodadien-15-al	7.4565	-1	-1	KNApSAcK=C00023477;C00023480,UNPD=UNPD154016;UNPD90179	C20H32O2	Colensane and clerodane diterpenoids	UKTMDPQNAINTJT-VDMXAYNXNA-N	O=CC=C(C)CCC1(C)C(CO)CCC2(C(=CCCC21)C)C
46	Poilaneic acid	7.452	-1	-1	KNApSAcK=C00031069	C20H32O2	Cembrane diterpenoids	ZKRZQCAKJPJQKD-HXBNQCTCNA-N	O=C(O)C1=CCCC(=CCCC(C=CC(CC1)C(C)C)C)C
47	Methandriol	7.4505	-1	-1	ChEBI=CHEBI:34834,LipidMAPS=LMST02020012,BLEXP=BLEXPDB00000229021	C20H32O2	Androgens and derivatives	WRWBCPJQPDHXTJ-DTMQFJJTSA-N	OC1CC2=CCC3C(CCC4(C)C3CCC4(O)C)C2(C)CC1
48	14,15-Dihydro-16-helicallenoic acid	7.4498	-1	-1	KNApSAcK=C00022169,UNPD=UNPD52466	C20H32O2	Sesquiterpenoids	XGCJEISMCSPXTA-SYLMQLBKNA-N	O=C(O)C(C)CCCC(=CCC=C(C)C1CC=C(C)CC1)C
49	7,8-Epoxy-1(E),3(E),11(E)-cembratrien-15-ol	7.4492	-1	-1	KNApSAcK=C00032673,UNPD=UNPD200039;UNPD55172;UNPD65764	C20H32O2	Cembrane diterpenoids	OAWYUCSBLMUTFD-SGQUXWJJNA-N	OC(C1=CC=C(C)CCC2OC2(C)CCC=C(C)CC1)(C)C
50	ent-cassa-12,15-dien-2beta,3beta-ol	7.444	-1	-1	ChEBI=CHEBI:138968	C20H32O2	Isocopalane and spongiane diterpenoids	FMPZXFBEGPUMKF-CCZDKEHANA-N	OC1CC2(C)C3CC=C(C=C)C(C)C3CCC2C(C)(C)C1O
51	11beta,12-Epoxy-7,17-sacculatadien-11alpha-ol	7.4428	-1	-1	KNApSAcK=C00035201,UNPD=UNPD141913	C20H32O2	Naphthofurans	ZMYLFMJWFSGDND-YNISYDSXNA-N	OC1OCC2=CCC3C(C)(CCC=C(C)C)CCCC3(C)C21
52	ent-8(17),12E,14-Labdatriene-3beta,19-diol	7.4424	-1	-1	KNApSAcK=C00023273,UNPD=UNPD184483;UNPD76586	C20H32O2	Diterpenoids	QKSJAAYFFAZIIF-UAHSUBCQNA-N	OCC1(C)C(O)CCC2(C)C(C(=C)CCC12)CC=C(C=C)C
53	Knightol	7.4391	-1	-1	KNApSAcK=C00047953,UNPD=UNPD176299	C20H32O2	Cembrane diterpenoids	IARQGWSRSWYGLX-PKUPFTDUNA-N	OCC1=CCC(C(=C)C)CCC(=CCCC2(OC2CC1)C)C
54	ent-4(18)-13E-Clerodadien-15-oic acid	7.4387	-1	-1	KNApSAcK=C00023498,UNPD=UNPD14417;UNPD180963;UNPD92851	C20H32O2	Colensane and clerodane diterpenoids	XSMNGDCOAWRVBS-NLLAJEERNA-N	O=C(O)C=C(C)CCC1(C)C(C)CCC2(C(=C)CCCC21)C
55	Sartone A;(+)-Sartone A	7.4377	-1	-1	KNApSAcK=C00049583;C00049584,UNPD=UNPD101900;UNPD158230;UNPD178942	C20H32O2	Cembrane diterpenoids	MZJKPKNXRRHNST-YNDAJIFVNA-N	O=C1C=C(C)CCC(C=CC(O)(C)CCC=C(C)C1)C(C)C
56	Hugorosenol;1(10),15-Rosadiene-2beta,3beta-diol	7.4375	-1	-1	KNApSAcK=C00033924,UNPD=UNPD126187;UNPD21191	C20H32O2	Hydrophenanthrenes	FPJMLNAVZWUNGU-VIXPOYOCNA-N	OC1C=C2C(CCC3CC(C=C)(C)CCC23C)C(C)(C)C1O
57	15-Hydroxy-8(17),13Z-labdadien-2-one	7.4331	-1	-1	KNApSAcK=C00022486,UNPD=UNPD129241	C20H32O2	Diterpenoids	FMZFOWXEZVDRBV-NAFONZPSNA-N	O=C1CC(C)(C)C2CCC(=C)C(CCC(=CCO)C)C2(C)C1
58	anadensin	7.4302	-1	-1	ChEBI=CHEBI:67830,UNPD=UNPD102287;UNPD30770	C20H32O2	Fusicoccane diterpenoids	JJHOOGDZTIBHQQ-LEZQRFRLNA-N	O=C1C=C2C(C)CCC3C(CCC3(C)CC2(O)C1C)C(C)C
59	Ambliol A	7.43	-1	-1	KNApSAcK=C00022174,UNPD=UNPD99138	C20H32O2	Sesquiterpenoids	GWDLJHLACNCUDH-IEHMUSNBNA-N	OC1(C)CCCC(C)(C)C1CCC(=CCCC2=COC=C2)C
60	rel-(3aR,4S,6aS,7R,9aR,10aS)-10a-Hydroxy-7-isopropyl-1,4,9a-trimethyl-4,5,6,6a,7,8,9,9a,10,10a-decahydro-3aH-dicyclopenta[a,d]cycloocten-3-one	7.4283	-1	-1	ChEBI=CHEBI:67828,UNPD=UNPD200920	C20H32O2	Fusicoccane diterpenoids	DJXIIUFLBYBOFZ-TXGXHAGCNA-N	O=C1C=C(C)C2(O)CC3(C)CCC(C(C)C)C3CCC(C)C12
61	fusicoauritone	7.4275	-1	-1	ChEBI=CHEBI:67831,UNPD=UNPD197285;UNPD79557	C20H32O2	Fusicoccane diterpenoids	UHLQGMSCOUMZFU-LTGLEVBANA-N	O=C1C(=C2CC3(C)CCC(C(C)C)C3CCC(C)C2(O)C1)C
62	Isodictyohemiacetal	7.4243	-1	-1	KNApSAcK=C00035662,UNPD=UNPD174464;UNPD82478;UNPD99553	C20H32O2	Tetrahydrofurans	GKHAFWZZEBWQKT-NCCXNOBSNA-N	OC1OCC2=CCC=C(C)CCC(C21)C(C)CCC=C(C)C
63	15-Hydroxy-8(17),12E-labdadien-16-al	7.4228	-1	-1	KNApSAcK=C00022439,UNPD=UNPD118455	C20H32O2	Diterpenoids	XSXWJVLHAJXGAX-RJYURHKPNA-N	O=CC(=CCC1C(=C)CCC2C(C)(C)CCCC12C)CCO
64	Flavidusin B;(+)-Flavidusin B	7.4158	-1	-1	KNApSAcK=C00044169,UNPD=UNPD65765	C20H32O2	17-hydroxysteroids	NNCAOPKALYJMLU-SGXQKNDTNA-N	OC1COC2C3=C(CCC21C)C4(C)CCCC(C)(C)C4CC3
65	[(1R,4aR,4bS)-7-isopropyl-1,4a-dimethyl-2,3,4,4b,5,9,10,10a-octahydrophenanthren-1-yl]methanediol	7.4113	-1	-1	PubChem=25203485,PlantCyc=CPD-8706	C20H32O2	Diterpenoids	MXMMKTLARUKBFV-RMGPQRKISA-N	OC(O)C1(C)CCCC2(C)C3C(=CC(=CC3)C(C)C)CCC12
66	taxa-4(20),11-dien-5alpha,13alpha-diol	7.4111	-1	-1	ChEBI=CHEBI:30041,LipidMAPS=LMPR0104390005,PubChem=443487,PlantCyc=TAXA-42011-DIEN-5A13A-DIOL	C20H32O2	Taxanes and derivatives	VTDWDDILICLAEK-RDGCENLJSA-N	OC1C(=C)C2CC3CC(O)C(=C(CCC2(C)CC1)C3(C)C)C
67	Ambliol B	7.4089	-1	-1	KNApSAcK=C00023435,UNPD=UNPD125637;UNPD34135	C20H32O2	Colensane and clerodane diterpenoids	ZCJPCXPMVIQGAS-JNWYSCRBNA-N	OC12CCC(C)C(C)(CCC3=COC=C3)C2CCCC1(C)C
68	Sarcophytol L;(-)-Sarcophytol L	7.4066	-1	-1	KNApSAcK=C00042946,UNPD=UNPD84524;UNPD221551	C20H32O2	Diterpenoids	YMOPJGVZPYEQEV-RKPACCIRNA-N	OC1C(=CC2C(C(=C)CCC=C(C)C1)CCC2(O)C)C(C)C
69	[(1R,4aS)-7-isopropyl-1,4a-dimethyl-2,3,4,5,6,9,10,10a-octahydrophenanthren-1-yl]methanediol	7.4057	-1	-1	PubChem=25200649,PlantCyc=CPD-8715	C20H32O2	Diterpenoids	HTUXDQHGRVMWAC-IPNZSQQUSA-N	OC(O)C1(C)CCCC2(C3=C(C=C(CC3)C(C)C)CCC21)C
70	Dictyol E	7.4045	-1	-1	KNApSAcK=C00035582,UNPD=UNPD168053;UNPD180532;UNPD3837	C20H32O2	Pachydictyane and cneorubin diterpenoids	WSCIOJNUJRINER-UHFFFAOYNA-N	OC1C2C(=CCC2C(=C)CCC1C(O)(C)CCC=C(C)C)C
71	(-)-Isoamijiol	7.4042	-1	-1	LipidMAPS=LMPR0104250002,UNPD=UNPD165890;UNPD186267	C20H32O2	Diterpenoids	YEHZXAFZUPRJBB-ZLQKJMDYNA-N	OC1C(=C)C2(O)CC3(C(=C(CC3)C(C)C)CCC2(C)CC1)C
72	12E,14-Secokoanolabdadiene	7.4038	-1	-1	KNApSAcK=C00023373,UNPD=UNPD10092;UNPD86524	C20H32O2	Monocyclic monoterpenoids	OTEFIMUKXOCZJU-GVAKLUMLNA-N	O=C(C)C(CC=C(C=C)C)C1(C)CCCC(C)(CO)C1C=C
73	16:3(2E,9E,11E)(3Me,5Me[S],7My,15Me)	7.3981	-1	-1	LipidMAPS=LMFA01030906	C20H32O2	Long-chain fatty acids	OKFYWUOJDXMQSW-ZXDHXAHCNA-N	O=C(O)C=C(C)CC(C)CC(=C)CC=CC=CCCC(C)C
74	(-)-Amijiol	7.3978	-1	-1	LipidMAPS=LMPR0104250001,UNPD=UNPD144685;UNPD83765	C20H32O2	Diterpenoids	ZHDYUIWBYAYXJQ-DVGONQDFNA-N	OC1CCC(=C)C2(O)CC3(C(=C(CC3)C(C)C)CCC12C)C
75	[(1R,4aR,4bS,7S)-1,4a,7-trimethyl-7-vinyl-3,4,4b,5,6,8,10,10a-octahydro-2H-phenanthren-1-yl]methanediol	7.394	-1	-1	PubChem=25202921,PlantCyc=CPD-8727	C20H32O2	Diterpenoids	UKPKCEDWXTYXKB-AEOXZHQRSA-N	OC(O)C1(C)CCCC2(C)C3C(=CCC12)CC(C=C)(C)CC3
76	Hugorosediol	7.3918	-1	-1	KNApSAcK=C00042595,UNPD=UNPD40750	C20H32O2	Steroids and steroid derivatives	LOMPYCNRFSPPGT-DWAANPCKNA-N	OCC1(C)C(O)CC=C2C1CCC3CC(C=C)(C)CCC23C
77	ent-17-Hydroxy-16beta-kauran-19-al	7.3909	-1	-1	HMDB=HMDB0036721,FooDB=FDB015658,UNPD=UNPD186703;UNPD42535	C20H32O2	Kaurane diterpenoids	ACXLVKYMISNUFD-UHFFFAOYNA-N	O=CC1(C)CCCC2(C)C1CCC34CC(CO)C(CCC32)C4
78	Pacificin P;(-)-Pacificin P	7.3901	-1	-1	KNApSAcK=C00030920,UNPD=UNPD86345	C20H32O2	Tertiary alcohols	HYYLPNGSMPGSAH-XGMMMQTCNA-N	OC(C=CCC1(C)CCC2(OC2CCC(=C)C3CC31)C)(C)C
79	Vitetrifolin G	7.3899	-1	-1	KNApSAcK=C00033487,UNPD=UNPD97331	C20H32O2	Tertiary alcohols	CYPPFALFRDZTNG-NDQAHANLNA-N	OC1C=C2C(=CCCC2(C)C)C(C)(CCC(O)(C=C)C)C1C
80	16:3(2E,10E,12E)(3Me,5Me[R],7My,15Me)	7.3882	-1	-1	LipidMAPS=LMFA01020367,UNPD=UNPD125071	C20H32O2	Long-chain fatty acids	XQIKRXUJLGQAKM-ZDISSKBDNA-N	O=C(O)C=C(C)CC(C)CC(=C)CCC=CC=CCC(C)C
81	[(1R,4aR,4bS)-7-isopropylidene-1,4a-dimethyl-3,4,4b,5,6,9,10,10a-octahydro-2H-phenanthren-1-yl]methanediol	7.3863	-1	-1	PubChem=25202670,PlantCyc=CPD-8710	C20H32O2	Diterpenoids	MZCCLBQMNVIBAW-RMGPQRKISA-N	OC(O)C1(C)CCCC2(C)C3C(=CC(=C(C)C)CC3)CCC12
82	(+)-Serradiol	7.3861	-1	-1	LipidMAPS=LMPR0104150006,UNPD=UNPD189753	C20H32O2	Atisane diterpenoids	YLPLMBSVCFKOSP-WIAFGYPFNA-N	OCC1(O)CC23C=CC1CC2C4(C)CCCC(C)(C)C4CC3
83	(5S,8R,9S,10S,13S,14S,17S)-10,13-dimethyl-2,3,4,5,6,7,8,9,11,12,14,15,16,17-tetradecahydro-1H-cyclopenta[a]phenanthrene-17-carboxylic acid	7.3846	-1	-1	BLEXP=BLEXPDB00006451987	C20H32O2	Hydroxysteroids	PBXJGQQGODZSQR-WQBJWTDHSA-N	O=C(O)C1CCC2C3CCC4CCCCC4(C)C3CCC12C
84	Sacculaporellin	7.3826	-1	-1	KNApSAcK=C00049293,UNPD=UNPD161446;UNPD19386	C20H32O2	Naphthofurans	CNTQSPORMWRWPD-CBVQUCCZNA-N	OC1OCC2C(=C)CCC3C(C)(CCC=C(C)C)CCCC123
85	3beta-Methoxyandrost-5-en-16beta-ol	7.3794	-1	-1	ChEBI=CHEBI:79869	C20H32O2	Androstane steroids	OUMKTFKBXXEGOM-ZPNXQJJCSA-N	OC1CC2C3CC=C4CC(OC)CCC4(C)C3CCC2(C)C1
86	Dictyol B	7.3791	-1	-1	KNApSAcK=C00035580,UNPD=UNPD136046;UNPD37208;UNPD50274	C20H32O2	Pachydictyane and cneorubin diterpenoids	HOKUKDGUBQCUIW-XQJZOJIZNA-N	OC1C(=C)C2CC=C(C)C2C(O)C(C1)C(C)CCC=C(C)C
87	15-Hydroxy-ent-labda-7,13E-dien-2-one	7.3768	-1	-1	KNApSAcK=C00022797	C20H32O2	Diterpenoids	SQQMOIGHDIGSOT-KEKCPJACNA-N	O=C1CC(C)(C)C2CC=C(C)C(CCC(=CCO)C)C2(C)C1
88	Cleospinol A	7.3751	-1	-1	KNApSAcK=C00043399,UNPD=UNPD186532	C20H32O2	Cembrane diterpenoids	GNHCOOWDEKAJLG-SBBKLFNSNA-N	OC1C=C(C)C(O)CC(C(=C)C)CC=C(C)CCC=C(C)C1
89	Sarcophytol V;(-)-Sarcophytol V	7.3745	-1	-1	KNApSAcK=C00031298,UNPD=UNPD24010	C20H32O2	Cembrane diterpenoids	GKYDYWFOGKJNCR-NCWGMGDZNA-N	OCC(O)(C1=CC=C(C)CCC=C(C)CCC=C(C)CC1)C
90	15-Hydroxy-11,16-epoxy-9,10-seco-ent-labda-8E,13Z,10(20)-triene	7.3739	-1	-1	KNApSAcK=C00023357,UNPD=UNPD137197	C20H32O2	Retinoids	GWWYMOQDTSHCQP-QSDFANNNNA-N	OCC=C1COC(C=C(C)CCC2C(=C)CCCC2(C)C)C1
91	Tagalsin D;(+)-Tagalsin D	7.3702	-1	-1	KNApSAcK=C00035399,UNPD=UNPD164861;UNPD32774	C20H32O2	Sesquiterpenoids	DNWOEBSKFPAKBW-SNUPCDMDNA-N	OC1CCC2C3(C)CCC(C=C)(C)CC3CCC2(C)C41OC4
92	sandaracopimaradiene-1alpha,9alpha-diol	7.3616	-1	-1	ChEBI=CHEBI:69179,UNPD=UNPD173693	C20H32O2	Hydrophenanthrenes	NSRIQLOVXVWUAB-UIUVJVHJNA-N	OC1CCC(C)(C)C2CCC3=CC(C=C)(C)CCC3(O)C12C
93	Sicanadiol	7.3561	-1	-1	KNApSAcK=C00048534,UNPD=UNPD81586	C20H32O2	Kaurane diterpenoids	CUBXXNGZGPRSKK-XWFLIFJONA-N	OC1CC2C(C)(C)CCCC2(C)C3C=CC4CC13CC4(O)C
94	8-[3]-ladderane-octanoic acid	7.3522	-1	-1	LipidMAPS=LMFA01140006	C20H32O2	Medium-chain fatty acids	RIAWBSMXETVQRQ-UHFFFAOYNA-N	O=C(O)CCCCCCCC1CCC2C(C1)C3C4CCC4C23
95	18-methyl-5Z,8Z,11Z,14Z-nonadecatetraenoic acid	7.3509	-1	-1	LipidMAPS=LMFA01020222,UNPD=UNPD56183	C20H32O2	Long-chain fatty acids	RYZDSXURMZIIOO-XBOCNYGYSA-N	O=C(O)CCCC=CCC=CCC=CCC=CCCC(C)C
96	2alpha,3alpha-Dihydroxy-1(15),8(19)-trinervitadiene	7.3484	-1	-1	KNApSAcK=C00042085;C00042091,UNPD=UNPD140825;UNPD146933;UNPD172161;UNPD180387;UNPD182935;UNPD194327;UNPD26001;UNPD33734;UNPD9950	C20H32O2	Diterpenoids	KKUYFJMPBSOTQV-QNHNIZSENA-N	OC1C2=C(C)C3C(C(=C)CCCC(C)CC2)CCC3(C)C1O
97	sphaeropsidin E	7.3481	-1	-1	NANPDB=NANPDB_4977	C20H32O2	Diterpenoids	CVEPYMRHNKKURK-GTXWJXBTSA-N	OC1C2=C(C(O)CC(C=C)(C)C2)C3(C)CCCC(C)(C)C3C1
98	90657589	7.3481	-1	-1	PubChem=90657589	C20H32O2	Fusicoccane diterpenoids	YBMMUDUUHHUHPW-HTZGKGDFSA-N	OCC1C2=CC3(C(=C(CC3)C(C)C)CC(O)C(C)C2CC1)C
99	Isotrinervidiol	7.3444	-1	-1	LipidMAPS=LMPR0104400003,UNPD=UNPD57459;UNPD64805;UNPD87952	C20H32O2	Diterpenoids	FXMHPHRSFCOEHI-BVMLIAOMNA-N	OC1C2=C(C)C3C(C(=CCCC(C)CC2)C)CCC3(C)C1O
100	Trachyloban-7beta,18-diol	7.344	-1	-1	KNApSAcK=C00037924,UNPD=UNPD128849;UNPD42599	C20H32O2	Kaurane diterpenoids	AYJDZPIYFBFTNU-WYVMTTOINA-N	OCC1(C)CCCC2(C)C1CC(O)C34CC5C(CC23)C5(C)C4
101	1-[2-[2-hydroxy-3-(4-methylpiperazino)propoxy]propoxy]butan-2-ol	4.8497	-1	-1		C15H32N2O4		QGPDIAVKVPKBQU-UHFFFAOYSA-N	OC(COC(C)COCC(O)CC)CN1CCN(C)CC1
102	1-(2-butoxyethoxy)-3-(2-morpholinoethylamino)propan-2-ol	4.8155	-1	-1		C15H32N2O4	Morpholines	RTOBZBPTRWLUQP-UHFFFAOYSA-N	OC(COCCOCCCC)CNCCN1CCOCC1
103	(1S,2R,3R,4S,5S,6R)-5-amino-6-(nonylamino)cyclohexane-1,2,3,4-tetrol	4.7903	-1	-1		C15H32N2O4	Aminocyclitols	OECZZIOVEAKTMH-PMKSJIGOSA-N	OC1C(O)C(O)C(NCCCCCCCCC)C(N)C1O
104	(2S,3S,4S)-2-[(1S)-1,2-dihydroxyethyl]-5-[2-(hexylamino)propyl]pyrrolidine-3,4-diol	4.7692	-1	-1		C15H32N2O4	Pyrrolidines	NYYINJJHCLJUNT-ACRIZNLRSA-N	OCC(O)C1NC(CC(NCCCCCC)C)C(O)C1O
105	3-[glyceryl-[3-(2-methylpiperidino)propyl]amino]propane-1,2-diol	4.7094	-1	-1		C15H32N2O4	Piperidines	VPNHVDOZGJZSGZ-UHFFFAOYSA-N	OCC(O)CN(CCCN1CCCCC1C)CC(O)CO
106	2,2-dimethyl-3-(1,4,10-trioxa-7,13-diazacyclopentadec-7-yl)propan-1-ol	4.6818	-1	-1		C15H32N2O4		AVPZSVZPNZBZQQ-UHFFFAOYSA-N	OCC(C)(C)CN1CCOCCOCCNCCOCC1
107	2-[2,2-diethoxyethyl(3-morpholinopropyl)amino]ethanol	4.6794	-1	-1		C15H32N2O4		ZCRCDTXTJLGRMB-UHFFFAOYSA-N	OCCN(CCCN1CCOCC1)CC(OCC)OCC
108	2-[2-[2-[2-[(1-ethyl-4-piperidyl)amino]ethoxy]ethoxy]ethoxy]ethanol	4.6772	-1	-1		C15H32N2O4		QYCZUGADVYXIMX-UHFFFAOYSA-N	OCCOCCOCCOCCNC1CCN(CC)CC1
109	2-[2-[2-[2-(4-isopropylpiperazino)ethoxy]ethoxy]ethoxy]ethanol	4.6661	-1	-1		C15H32N2O4		KMWYXMXEDKTJNV-UHFFFAOYSA-N	OCCOCCOCCOCCN1CCN(CC1)C(C)C
110	1-(2-isopropoxyethoxy)-3-(3-morpholinopropylamino)propan-2-ol	4.6579	-1	-1		C15H32N2O4	Morpholines	LSHCKIRTCRTVDG-UHFFFAOYSA-N	OC(COCCOC(C)C)CNCCCN1CCOCC1
111	4-[2,2-dimethoxyethyl(3-morpholinopropyl)amino]butan-1-ol	4.6389	-1	-1		C15H32N2O4		NWNTVSFDFNTIFQ-UHFFFAOYSA-N	OCCCCN(CCCN1CCOCC1)CC(OC)OC
112	2-[2-[2-[2-[methyl(2-pyrrolidinoethyl)amino]ethoxy]ethoxy]ethoxy]ethanol	4.6365	-1	-1		C15H32N2O4		RKWNWOVXNIUWNO-UHFFFAOYSA-N	OCCOCCOCCOCCN(C)CCN1CCCC1
113	1-[[1-(2-aminoethyl)piperazin-2-yl]-(2-hydroxypropyl)amino]-2-ethyl-propane-1,3-diol	4.6339	-1	-1		C14H32N4O3		UULYVOFGKOGWPD-UHFFFAOYSA-N	OCC(CC)C(O)N(CC(O)C)C1N(CCN)CCNC1
114	1-[4-(2-ethoxyethyl)piperazino]-3-(2-methoxy-1-methyl-ethoxy)propan-2-ol	4.6277	-1	-1		C15H32N2O4		HXBZZXARERGFBX-UHFFFAOYSA-N	OC(COC(C)COC)CN1CCN(CCOCC)CC1
115	3-[[2-hydroxy-3-(2-isopropoxyethoxy)propyl]amino]-N-sec-butyl-propionamide	4.6225	-1	-1		C15H32N2O4		FTRAECUKMZWDFB-UHFFFAOYSA-N	O=C(NC(C)CC)CCNCC(O)COCCOC(C)C
116	3-[[3-(2-butoxyethoxy)-2-hydroxy-propyl]amino]-N-propyl-propionamide	4.6182	-1	-1		C15H32N2O4		KPAZAENLUDRQMB-UHFFFAOYSA-N	O=C(NCCC)CCNCC(O)COCCOCCCC
117	1-(tert-butylthio)-3-decoxy-propan-2-ol	4.6149	-1	-1		C17H36O2S	Secondary alcohols	UKMUFNZOTXCUAG-UHFFFAOYSA-N	OC(COCCCCCCCCCC)CSC(C)(C)C
118	1-(butylthio)-3-decoxy-propan-2-ol	4.6055	-1	-1		C17H36O2S	Secondary alcohols	GZRGWJPPQVOCJE-UHFFFAOYSA-N	OC(COCCCCCCCCCC)CSCCCC
119	1-(2-ethylhexyl)-3-[2-[2-(2-hydroxyethoxy)ethoxy]ethyl]urea	4.6028	-1	-1		C15H32N2O4		LSXGQNHXDUMLLK-UHFFFAOYSA-N	O=C(NCCOCCOCCO)NCC(CC)CCCC
120	1-ethoxy-3-[4-(3-ethoxy-2-hydroxy-propyl)-1,4-diazepan-1-yl]propan-2-ol	4.5966	-1	-1		C15H32N2O4		WAQKBDMDTZMPQV-UHFFFAOYSA-N	OC(COCC)CN1CCN(CCC1)CC(O)COCC
121	3-[tert-amyl-[2-[bis(2-hydroxyethyl)amino]ethyl]amino]propionic acid methyl ester	4.5952	-1	-1		C15H32N2O4		RCBOZMGPQQZHKU-UHFFFAOYSA-N	O=C(OC)CCN(CCN(CCO)CCO)C(C)(C)CC
122	1-(ethylthio)-3-lauryloxy-propan-2-ol	4.5938	-1	-1		C17H36O2S	Secondary alcohols	LCFOVJMUABRKKG-UHFFFAOYSA-N	OC(COCCCCCCCCCCCC)CSCC
123	N-[2-[2-[bis(2-hydroxyethyl)amino]ethoxy]ethyl]enanthamide	4.586	-1	-1		C15H32N2O4	N-acyl amines	NAPDKCQZTSPMSO-UHFFFAOYSA-N	O=C(NCCOCCN(CCO)CCO)CCCCCC
124	2-[2-[2-(2-ethoxyethoxy)ethoxy]ethoxy]ethyl-(4-piperidyl)amine	4.5853	-1	-1		C15H32N2O4	Aminopiperidines	YECVYIRWDQKRAQ-UHFFFAOYSA-N	O(CC)CCOCCOCCOCCNC1CCNCC1
125	2-[[3-(2-butoxyethoxy)-2-hydroxy-propyl]amino]-N-propyl-propionamide	4.5726	-1	-1		C15H32N2O4		NXHKRVUJOGFGCX-UHFFFAOYSA-N	O=C(NCCC)C(NCC(O)COCCOCCCC)C
126	2-[methyl-[2-[2-[2-(2-pyrrolidinoethoxy)ethoxy]ethoxy]ethyl]amino]ethanol	4.5723	-1	-1		C15H32N2O4		PQDDVKJLRKICND-UHFFFAOYSA-N	OCCN(C)CCOCCOCCOCCN1CCCC1
127	4,4-bis(tert-amylperoxy)diazepane	4.5666	-1	-1		C15H32N2O4		PVISCLSEAYJWKO-UHFFFAOYSA-N	O(OC(C)(C)CC)C1(OOC(C)(C)CC)CNNCCC1
128	1-(hexylthio)-3-octoxy-propan-2-ol	4.5658	-1	-1		C17H36O2S	Secondary alcohols	NKNWKCOUMSMYLB-UHFFFAOYSA-N	OC(COCCCCCCCC)CSCCCCCC
129	2-[2-[2-[methyl-[2-(2-pyrrolidinoethoxy)ethyl]amino]ethoxy]ethoxy]ethanol	4.5584	-1	-1		C15H32N2O4		CJNRYNYRNHOBFB-UHFFFAOYSA-N	OCCOCCOCCN(C)CCOCCN1CCCC1
130	2-[2-[2-hydroxyethyl-[2-[4-(2-hydroxyethyl)piperazino]ethyl]amino]ethylamino]ethanol	4.553	-1	-1		C14H32N4O3	N-alkylpiperazines	GWJHNBLCMIPHHE-UHFFFAOYSA-N	OCCNCCN(CCO)CCN1CCN(CCO)CC1
131	2-[13-(2-aminoethyl)-1,4,10-trioxa-7,13-diazacyclopentadec-7-yl]ethylamine	4.5501	-1	-1		C14H32N4O3		LDWUZEUGZYITBJ-UHFFFAOYSA-N	O1CCOCCN(CCOCCN(CC1)CCN)CCN
132	2-[4,7-bis(2-hydroxyethyl)-1,4,7,10-tetrazacyclododec-1-yl]ethanol	4.5455	-1	-1		C14H32N4O3		XILLOIWJZLNVOC-UHFFFAOYSA-N	OCCN1CCNCCN(CCO)CCN(CCO)CC1
133	2-[2-[[(2R,5S)-5-[[2-(2-hydroxyethylamino)ethylamino]methyl]tetrahydrofuran-2-yl]methylamino]ethylamino]ethanol	4.5433	-1	-1		C14H32N4O3		MOUPJDVTFYCBQW-OKILXGFUSA-N	OCCNCCNCC1OC(CNCCNCCO)CC1
134	(2R)-3-(myristylthio)propane-1,2-diol	4.5208	-1	-1		C17H36O2S		GSHFQSBOMXBURY-QGZVFWFLSA-N	OCC(O)CSCCCCCCCCCCCCCC
135	2-ethoxy-3-(laurylthio)propan-1-ol	4.5182	-1	-1		C17H36O2S	Dialkyl ethers	VYILWIJVYGRAOQ-UHFFFAOYSA-N	OCC(OCC)CSCCCCCCCCCCCC
136	4-(tridecylthio)butane-1,2-diol	4.5181	-1	-1		C17H36O2S	1,2-diols	NUBDSDURKNFABO-UHFFFAOYSA-N	OCC(O)CCSCCCCCCCCCCCCC
137	1-[2-[methyl-[2-[(4-methylmorpholin-3-yl)methoxy]ethyl]amino]ethoxy]butan-2-ol	4.5158	-1	-1		C15H32N2O4		BPGTZQCQPFYYIR-UHFFFAOYSA-N	OC(COCCN(C)CCOCC1N(C)CCOC1)CC
138	1-(2-hydroxyethylthio)pentadecan-2-ol	4.5105	-1	-1		C17H36O2S		YJQVDPFSGKNJJZ-UHFFFAOYSA-N	OCCSCC(O)CCCCCCCCCCCCC
139	2-[2-[methyl-[2-[2-(2-pyrrolidinoethoxy)ethoxy]ethyl]amino]ethoxy]ethanol	4.4982	-1	-1		C15H32N2O4		JLSRCQXIVLSJHK-UHFFFAOYSA-N	OCCOCCN(C)CCOCCOCCN1CCCC1
140	5-(laurylthio)pentane-1,3-diol	4.4953	-1	-1		C17H36O2S	Secondary alcohols	IQXIBMFICAZMOB-UHFFFAOYSA-N	OCCC(O)CCSCCCCCCCCCCCC
141	2-[2-[2-(dimethylamino)ethoxy]ethyl-(2-isoamoxyethyl)amino]acetic acid	4.4761	-1	-1		C15H32N2O4		NNJGKTHSFQLDDX-UHFFFAOYSA-N	O=C(O)CN(CCOCCN(C)C)CCOCCC(C)C
142	1-[(3-butyl-3-methyl-decyl)thio]ethane-1,2-diol	4.4679	-1	-1		C17H36O2S		VXWZZKXTTZFHOP-UHFFFAOYSA-N	OCC(O)SCCC(C)(CCCC)CCCCCCC
143	N-[3-[2-ethoxyethyl(methyl)amino]-2-hydroxy-2-methyl-propyl]-N-methyl-carbamic acid tert-butyl ester	4.4418	-1	-1		C15H32N2O4		VBHFPKDYXIRXFD-UHFFFAOYSA-N	O=C(OC(C)(C)C)N(C)CC(O)(C)CN(C)CCOCC
144	4-[2-methoxyethyl-(2-methoxy-1-methyl-ethyl)amino]-2-methyl-2-(propylamino)butyric acid	4.4273	-1	-1		C15H32N2O4		NCWCTRNHKWBJNY-UHFFFAOYSA-N	O=C(O)C(NCCC)(C)CCN(CCOC)C(C)COC
145	2-(isopropylamino)-4-[2-methoxyethyl-(2-methoxy-1-methyl-ethyl)amino]-2-methyl-butyric acid	4.4263	-1	-1		C15H32N2O4		BDDNPTSWWGATCY-UHFFFAOYSA-N	O=C(O)C(NC(C)C)(C)CCN(CCOC)C(C)COC
146	1-myristylsulfinylpropan-2-ol	4.4169	-1	-1		C17H36O2S		DBZFQNIGGKASOW-UHFFFAOYSA-N	O=S(CCCCCCCCCCCCCC)CC(O)C
147	7-(2-propoxyethyl)-1,4,10-trioxa-7,13-diazacyclopentadecane	4.4085	-1	-1		C15H32N2O4	Trialkylamines	RTLZBGYZGBHQIT-UHFFFAOYSA-N	O1CCOCCN(CCOCCNCC1)CCOCCC
148	4-[2-methoxyethyl(3-methoxypropyl)amino]-2-methyl-2-(propylamino)butyric acid	4.4081	-1	-1		C15H32N2O4		DNTCQDCWPLXTOM-UHFFFAOYSA-N	O=C(O)C(NCCC)(C)CCN(CCOC)CCCOC
149	2-(isopropylamino)-4-[2-methoxyethyl(3-methoxypropyl)amino]-2-methyl-butyric acid	4.4062	-1	-1		C15H32N2O4		HBJJGAKHGOWLGC-UHFFFAOYSA-N	O=C(O)C(NC(C)C)(C)CCN(CCOC)CCCOC
150	2-[ethyl-[2-[[(2S)-2-hydroxypropyl]-[2-[[(2S)-2-hydroxypropyl]amino]ethyl]amino]ethyl]amino]acetamide	4.4028	-1	-1		C14H32N4O3		HZTYZGSZVPQQKH-STQMWFEESA-N	O=C(N)CN(CC)CCN(CCNCC(O)C)CC(O)C
151	2-[ethyl-[2-[2-(ethylamino)ethylamino]ethyl]amino]-N-glyceryl-N-methyl-acetamide	4.3994	-1	-1		C14H32N4O3	Alpha amino acids and derivatives	YVMJXQPCOVIFET-UHFFFAOYSA-N	O=C(N(C)CC(O)CO)CN(CC)CCNCCNCC
152	5-[bis(2-methoxyethyl)amino]-2-(isopropylamino)-2-methyl-valeric acid	4.3797	-1	-1		C15H32N2O4		YPIHEDPKTAFANM-UHFFFAOYSA-N	O=C(O)C(NC(C)C)(C)CCCN(CCOC)CCOC
153	5-[bis(2-methoxyethyl)amino]-2-methyl-2-(propylamino)valeric acid	4.3778	-1	-1		C15H32N2O4		FJYOPNUESJUADL-UHFFFAOYSA-N	O=C(O)C(NCCC)(C)CCCN(CCOC)CCOC
154	2-amino-5-[2-methoxyethyl-(2-methoxy-1-methyl-ethyl)amino]-2-methyl-valeric acid ethyl ester	4.3603	-1	-1		C15H32N2O4		LWRCONUYOIMHJP-UHFFFAOYSA-N	O=C(OCC)C(N)(C)CCCN(CCOC)C(C)COC
155	2-(ethylamino)-5-[2-methoxyethyl-(2-methoxy-1-methyl-ethyl)amino]-2-methyl-valeric acid	4.3544	-1	-1		C15H32N2O4		NFWAYXRCYFEZHQ-UHFFFAOYSA-N	O=C(O)C(NCC)(C)CCCN(CCOC)C(C)COC
156	2-amino-5-[2-methoxyethyl(3-methoxypropyl)amino]-2-methyl-valeric acid ethyl ester	4.3392	-1	-1		C15H32N2O4		LFTWWDHPPNGWSW-UHFFFAOYSA-N	O=C(OCC)C(N)(C)CCCN(CCOC)CCCOC
157	2-amino-6-[bis(2-methoxyethyl)amino]-2-methyl-hexanoic acid ethyl ester	4.3378	-1	-1		C15H32N2O4		ZQAOCMBGWSFBKY-UHFFFAOYSA-N	O=C(OCC)C(N)(C)CCCCN(CCOC)CCOC
158	1-(1-ethyl-3-isopropoxy-1-methyl-propoxy)-2,4-dimethyl-1-(methylthio)pentane	4.3375	-1	-1		C17H36O2S		WVIDKUPFXWRTJC-UHFFFAOYSA-N	O(CCC(OC(SC)C(C)CC(C)C)(C)CC)C(C)C
159	2-(ethylamino)-5-[2-methoxyethyl(3-methoxypropyl)amino]-2-methyl-valeric acid	4.3361	-1	-1		C15H32N2O4		BPORTJNRONAGFI-UHFFFAOYSA-N	O=C(O)C(NCC)(C)CCCN(CCOC)CCCOC
160	6-[bis(2-methoxyethyl)amino]-2-(ethylamino)-2-methyl-hexanoic acid	4.3293	-1	-1		C15H32N2O4		YNNZQIBEHLAKSH-UHFFFAOYSA-N	O=C(O)C(NCC)(C)CCCCN(CCOC)CCOC
161	6-[2-methoxyethyl-(2-methoxy-1-methyl-ethyl)amino]-2-methyl-2-(methylamino)hexanoic acid	4.3277	-1	-1		C15H32N2O4		KXKPFSKKJOGZQM-UHFFFAOYSA-N	O=C(O)C(NC)(C)CCCCN(CCOC)C(C)COC
162	2-amino-6-[2-methoxyethyl(3-methoxypropyl)amino]-2-methyl-hexanoic acid methyl ester	4.3222	-1	-1		C15H32N2O4		PTSDAJSKHJATCF-UHFFFAOYSA-N	O=C(OC)C(N)(C)CCCCN(CCOC)CCCOC
163	6-[2-methoxyethyl(3-methoxypropyl)amino]-2-methyl-2-(methylamino)hexanoic acid	4.318	-1	-1		C15H32N2O4		IQMFHOOKMVWPSI-UHFFFAOYSA-N	O=C(O)C(NC)(C)CCCCN(CCOC)CCCOC
164	carbonic acid tert-butyl [(1R,2S,3S)-1-methoxy-3-methyl-2-[methyl(methylaminomethyl)amino]pentyl] ester	4.3168	-1	-1		C15H32N2O4		MXLMGRWQGOUXPE-RWMBFGLXSA-N	O=C(OC(OC)C(N(C)CNC)C(C)CC)OC(C)(C)C
165	3-[2-[2-[methyl-[2-(methylamino)ethyl]amino]ethoxy]ethoxy]propionic acid tert-butyl ester	4.3144	-1	-1		C15H32N2O4		VROYCYWEWWSVEE-UHFFFAOYSA-N	O=C(OC(C)(C)C)CCOCCOCCN(C)CCNC
166	3-[2-(2-isoamoxyethoxy)ethoxy]-N'-isopropyl-propionohydrazide	4.3002	-1	-1		C15H32N2O4		PKFGXBDPLWGMFQ-UHFFFAOYSA-N	O=C(NNC(C)C)CCOCCOCCOCCC(C)C
167	8-nonylsulfinyloctan-1-ol	4.2726	-1	-1		C17H36O2S		RYGUQWRFSADFRA-UHFFFAOYSA-N	O=S(CCCCCCCCO)CCCCCCCCC
168	N-[5-amino-1-[(1-aminoethylamino)methyl]pentyl]-4-hydroxy-2-methylol-valeramide	4.2725	-1	-1		C14H32N4O3	N-acyl amines	ISNBEIPWLRTJGW-UHFFFAOYSA-N	O=C(NC(CNC(N)C)CCCCN)C(CO)CC(O)C
169	4-[3-(2-aminoethoxy)-3-methyl-butoxy]-N-(2-hydroxyethyl)-4-methyl-valeramide	4.27	-1	-1		C15H32N2O4		GTFKGMPYYSZKBN-UHFFFAOYSA-N	O=C(NCCO)CCC(OCCC(OCCN)(C)C)(C)C
170	9-octylsulfinylnonan-1-ol	4.2692	-1	-1		C17H36O2S		DOGHFRNYLODXNN-UHFFFAOYSA-N	O=S(CCCCCCCC)CCCCCCCCCO
171	N-[2-[2-[2-[2-(isopropylamino)ethoxy]ethoxy]ethoxy]ethyl]-2-methyl-propionamide	4.2663	-1	-1		C15H32N2O4		OCABSQQEDHIGAQ-UHFFFAOYSA-N	O=C(NCCOCCOCCOCCNC(C)C)C(C)C
172	3-[4-[2-[2-(4-aminobutoxy)ethoxy]ethoxy]butylamino]propionaldehyde	4.2643	-1	-1		C15H32N2O4	Alpha-hydrogen aldehydes	TTWSIWICWNJJJT-UHFFFAOYSA-N	O=CCCNCCCCOCCOCCOCCCCN
173	N-[2-[2-(2-aminoethoxy)ethoxy]ethyl]-2,6-bis(methylamino)hexanamide	4.2505	-1	-1		C14H32N4O3	Alpha amino acid amides	QBCOVONFAAQQEB-UHFFFAOYSA-N	O=C(NCCOCCOCCN)C(NC)CCCCNC
174	(5R)-N-[2-(dimethylamino)ethyl]-5-hydroxy-3-(N'-ketohydrazino)-N,2-dimethyl-hexanamide;ethane	4.2482	-1	-1		C14H32N4O3		NLEXHOCFNNLHPG-XRUJYBCYSA-N	O=NNC(CC(O)C)C(C(=O)N(C)CCN(C)C)C.CC
175	N-[1-methyl-2-[1-methyl-2-[2-[2-(methylamino)propoxy]ethoxy]ethoxy]ethyl]propionamide	4.2482	-1	-1		C15H32N2O4		NIUGMVYRJSROOS-UHFFFAOYSA-N	O=C(NC(C)COC(C)COCCOCC(NC)C)CC
176	3-[2-methoxyethyl-(2-methoxy-1-methyl-ethyl)amino]-2-methyl-2-(propylamino)propionic acid methyl ester	4.2282	-1	-1		C15H32N2O4		VFVCGXAMUIQXNT-UHFFFAOYSA-N	O=C(OC)C(NCCC)(C)CN(CCOC)C(C)COC
177	2-amino-2-[3-(3-amino-3-methyl-butoxy)-1,1,3-trimethyl-butoxy]propionic acid	4.2277	-1	-1		C15H32N2O4		CYYORSNIBBUZDN-UHFFFAOYSA-N	O=C(O)C(OC(C)(C)CC(OCCC(N)(C)C)(C)C)(N)C
178	2-(isopropylamino)-3-[2-methoxyethyl-(2-methoxy-1-methyl-ethyl)amino]-2-methyl-propionic acid methyl ester	4.2264	-1	-1		C15H32N2O4		HNKUIWAUDAVFFO-UHFFFAOYSA-N	O=C(OC)C(NC(C)C)(C)CN(CCOC)C(C)COC
179	4-(1,2-dimethylbutylthio)-3-ethyl-1-(2-methoxyethoxy)-4-methyl-pentane	4.2248	-1	-1		C17H36O2S		BHVJCJZHOQBAGW-UHFFFAOYSA-N	O(C)CCOCCC(CC)C(SC(C)C(C)CC)(C)C
180	3-[2-methoxyethyl-(2-methoxy-1-methyl-ethyl)amino]-2-(propylamino)propionic acid ethyl ester	4.2224	-1	-1		C15H32N2O4		ANJIXDSTASYDFH-UHFFFAOYSA-N	O=C(OCC)C(NCCC)CN(CCOC)C(C)COC
181	3-[2-methoxyethyl(3-methoxypropyl)amino]-2-(propylamino)propionic acid ethyl ester	4.222	-1	-1		C15H32N2O4		GCXTWDNEPPVMMM-UHFFFAOYSA-N	O=C(OCC)C(NCCC)CN(CCOC)CCCOC
182	2-(isopropylamino)-3-[2-methoxyethyl-(2-methoxy-1-methyl-ethyl)amino]propionic acid ethyl ester	4.2203	-1	-1		C15H32N2O4		RVUPHTAOJNTLHO-UHFFFAOYSA-N	O=C(OCC)C(NC(C)C)CN(CCOC)C(C)COC
183	4-[bis(2-methoxyethyl)amino]-2-(propylamino)butyric acid ethyl ester	4.2192	-1	-1		C15H32N2O4	Alpha amino acid esters	WRHDWASHPMYTNT-UHFFFAOYSA-N	O=C(OCC)C(NCCC)CCN(CCOC)CCOC
184	2-(isopropylamino)-3-[2-methoxyethyl(3-methoxypropyl)amino]propionic acid ethyl ester	4.2187	-1	-1		C15H32N2O4		TZIYMDIZYXMMHO-UHFFFAOYSA-N	O=C(OCC)C(NC(C)C)CN(CCOC)CCCOC
185	4-[bis(2-methoxyethyl)amino]-2-(isopropylamino)butyric acid ethyl ester	4.2159	-1	-1		C15H32N2O4	Alpha amino acid esters	YIJHUFQMDJEINN-UHFFFAOYSA-N	O=C(OCC)C(NC(C)C)CCN(CCOC)CCOC
186	3-[2-methoxyethyl(3-methoxypropyl)amino]-2-methyl-2-(propylamino)propionic acid methyl ester	4.2145	-1	-1		C15H32N2O4		MHBATOQBTYGSRE-UHFFFAOYSA-N	O=C(OC)C(NCCC)(C)CN(CCOC)CCCOC
187	2-pentadecylsulfinylethanol	4.2129	-1	-1		C17H36O2S		NMHWYJCYEINYOS-UHFFFAOYSA-N	O=S(CCO)CCCCCCCCCCCCCCC
188	2-(isopropylamino)-3-[2-methoxyethyl(3-methoxypropyl)amino]-2-methyl-propionic acid methyl ester	4.2126	-1	-1		C15H32N2O4		VDJUCVDYWXDELP-UHFFFAOYSA-N	O=C(OC)C(NC(C)C)(C)CN(CCOC)CCCOC
189	N-[3-[2-(3-aminopropoxy)-2-methyl-propoxy]propyl]carbamic acid tert-butyl ester	4.2058	-1	-1		C15H32N2O4		XDEFBWQQAYTHGV-UHFFFAOYSA-N	O=C(OC(C)(C)C)NCCCOCC(OCCCN)(C)C
190	3-(caprylylamino)propyl-(carboxymethyl)-dimethyl-ammonium;hydroxide	4.2046	-1	-1		C15H32N2O4	Alpha amino acids	NYRZVNFMNOUXFZ-UHFFFAOYSA-N	[OH-].O=C(O)C[N+](C)(C)CCCNC(=O)CCCCCCC
191	4-[2-methoxyethyl(3-methoxypropyl)amino]-2-(propylamino)butyric acid methyl ester	4.1978	-1	-1		C15H32N2O4	Alpha amino acid esters	REPNXVVDYKEXBH-UHFFFAOYSA-N	O=C(OC)C(NCCC)CCN(CCOC)CCCOC
192	N-isobutylcarbamic acid 2-[2-[2-(isobutylamino)ethoxy]ethoxy]ethyl ester	4.1964	-1	-1		C15H32N2O4		NNCMEPGAZLZAAU-UHFFFAOYSA-N	O=C(OCCOCCOCCNCC(C)C)NCC(C)C
193	2-(isopropylamino)-4-[2-methoxyethyl(3-methoxypropyl)amino]butyric acid methyl ester	4.1958	-1	-1		C15H32N2O4	Alpha amino acid esters	XBZJLFYCIAYHCP-UHFFFAOYSA-N	O=C(OC)C(NC(C)C)CCN(CCOC)CCCOC
194	4-[2-methoxyethyl-(2-methoxy-1-methyl-ethyl)amino]-2-(propylamino)butyric acid methyl ester	4.1957	-1	-1		C15H32N2O4	Alpha amino acid esters	JMVXVIZTZLKLGR-UHFFFAOYSA-N	O=C(OC)C(NCCC)CCN(CCOC)C(C)COC
195	2-(isopropylamino)-4-[2-methoxyethyl-(2-methoxy-1-methyl-ethyl)amino]butyric acid methyl ester	4.1939	-1	-1		C15H32N2O4	Alpha amino acid esters	YPEBOACTLXZFLT-UHFFFAOYSA-N	O=C(OC)C(NC(C)C)CCN(CCOC)C(C)COC
196	2-amino-6-[2-methoxyethyl-(2-methoxy-1-methyl-ethyl)amino]-2-methyl-hexanoic acid methyl ester	4.192	-1	-1		C15H32N2O4		PNRSHVVUJYAEPA-UHFFFAOYSA-N	O=C(OC)C(N)(C)CCCCN(CCOC)C(C)COC
197	N-isopropyl-3-[2-[2-[2-(isopropylamino)ethoxy]ethoxy]ethoxy]propionamide	4.1915	-1	-1		C15H32N2O4		BHTLFLNIBYOVEY-UHFFFAOYSA-N	O=C(NC(C)C)CCOCCOCCOCCNC(C)C
198	3-[bis(2-methoxyethyl)amino]-2-methyl-2-(propylamino)propionic acid ethyl ester	4.1836	-1	-1		C15H32N2O4		SLMMQNCYIOISNI-UHFFFAOYSA-N	O=C(OCC)C(NCCC)(C)CN(CCOC)CCOC
199	3-[bis(2-methoxyethyl)amino]-2-(isopropylamino)-2-methyl-propionic acid ethyl ester	4.1803	-1	-1		C15H32N2O4		IUAVYSLYZKCTHH-UHFFFAOYSA-N	O=C(OCC)C(NC(C)C)(C)CN(CCOC)CCOC
200	1-[2-[2-(methylthio)ethoxy]ethoxy]dodecane	4.1777	-1	-1		C17H36O2S		SBUYFDICTOVCSO-UHFFFAOYSA-N	O(CCOCCCCCCCCCCCC)CCSC
201	1-[3-[2-(3,3-dimethylbutoxy)ethylthio]propoxy]-3,3-dimethyl-butane	4.1762	-1	-1		C17H36O2S	Dialkyl ethers	ABJXKRPWYVQORL-UHFFFAOYSA-N	O(CCSCCCOCCC(C)(C)C)CCC(C)(C)C
202	2-(ethylamino)-3-[2-methoxyethyl(3-methoxypropyl)amino]-2-methyl-propionic acid ethyl ester	4.169	-1	-1		C15H32N2O4		SLGULDPOKQHPHL-UHFFFAOYSA-N	O=C(OCC)C(NCC)(C)CN(CCOC)CCCOC
203	2-(ethylamino)-3-[2-methoxyethyl-(2-methoxy-1-methyl-ethyl)amino]-2-methyl-propionic acid ethyl ester	4.1686	-1	-1		C15H32N2O4		DSGAJQJPVNXVFJ-UHFFFAOYSA-N	O=C(OCC)C(NCC)(C)CN(CCOC)C(C)COC
204	6-[bis(2-methoxyethyl)amino]-2-methyl-2-(methylamino)hexanoic acid methyl ester	4.1661	-1	-1		C15H32N2O4		ZQBVKETYIWBKEX-UHFFFAOYSA-N	O=C(OC)C(NC)(C)CCCCN(CCOC)CCOC
205	4-[bis(2-methoxyethyl)amino]-2-(ethylamino)-2-methyl-butyric acid ethyl ester	4.1654	-1	-1		C15H32N2O4		YMUNWLNZVVKQTH-UHFFFAOYSA-N	O=C(OCC)C(NCC)(C)CCN(CCOC)CCOC
206	2-(ethylamino)-4-[2-methoxyethyl(3-methoxypropyl)amino]-2-methyl-butyric acid methyl ester	4.1602	-1	-1		C15H32N2O4		ZOPCZEXSMLYTTI-UHFFFAOYSA-N	O=C(OC)C(NCC)(C)CCN(CCOC)CCCOC
207	5-[bis(2-methoxyethyl)amino]-2-(ethylamino)-2-methyl-valeric acid methyl ester	4.1602	-1	-1		C15H32N2O4		MZAYBFNJQRLYFL-UHFFFAOYSA-N	O=C(OC)C(NCC)(C)CCCN(CCOC)CCOC
208	2-(ethylamino)-4-[2-methoxyethyl-(2-methoxy-1-methyl-ethyl)amino]-2-methyl-butyric acid methyl ester	4.1579	-1	-1		C15H32N2O4		BECDZAHHZAIXSD-UHFFFAOYSA-N	O=C(OC)C(NCC)(C)CCN(CCOC)C(C)COC
209	N-[2-[2-[3-(propylamino)propoxy]ethoxy]ethyl]carbamic acid tert-butyl ester	4.1564	-1	-1		C15H32N2O4		QOVWBOVPARDQMA-UHFFFAOYSA-N	O=C(OC(C)(C)C)NCCOCCOCCCNCCC
210	4-[2-methoxyethyl-(2-methoxy-1-methyl-ethyl)amino]-2-methyl-2-(methylamino)butyric acid ethyl ester	4.1542	-1	-1		C15H32N2O4		BRFKCAQTEARUPT-UHFFFAOYSA-N	O=C(OCC)C(NC)(C)CCN(CCOC)C(C)COC
211	5-[bis(2-methoxyethyl)amino]-2-methyl-2-(methylamino)valeric acid ethyl ester	4.1507	-1	-1		C15H32N2O4		HKXGHHXPMLDHKR-UHFFFAOYSA-N	O=C(OCC)C(NC)(C)CCCN(CCOC)CCOC
212	3-amino-1,1-bis(2-ethoxyethyl)-2-(3-ethoxypropyl)guanidine	4.1503	-1	-1		C14H32N4O3		BJOSYXTWWMLGJQ-UHFFFAOYSA-N	N(=C(NN)N(CCOCC)CCOCC)CCCOCC
213	4-[bis(2-methoxyethyl)amino]-2-methyl-2-(propylamino)butyric acid methyl ester	4.1478	-1	-1		C15H32N2O4		ZXKIFRGDUGLJHS-UHFFFAOYSA-N	O=C(OC)C(NCCC)(C)CCN(CCOC)CCOC
214	4-[2-methoxyethyl(3-methoxypropyl)amino]-2-methyl-2-(methylamino)butyric acid ethyl ester	4.1472	-1	-1		C15H32N2O4		LNWHWGPGMQALFE-UHFFFAOYSA-N	O=C(OCC)C(NC)(C)CCN(CCOC)CCCOC
215	4-[bis(2-methoxyethyl)amino]-2-(isopropylamino)-2-methyl-butyric acid methyl ester	4.1459	-1	-1		C15H32N2O4		TWZAAGIVKJBENZ-UHFFFAOYSA-N	O=C(OC)C(NC(C)C)(C)CCN(CCOC)CCOC
216	5-[2-methoxyethyl(3-methoxypropyl)amino]-2-methyl-2-(methylamino)valeric acid methyl ester	4.1448	-1	-1		C15H32N2O4		MVXYJXHPDNVTDC-UHFFFAOYSA-N	O=C(OC)C(NC)(C)CCCN(CCOC)CCCOC
217	2-(ethylamino)-4-[2-methoxyethyl-(2-methoxy-1-methyl-ethyl)amino]butyric acid ethyl ester	4.1445	-1	-1		C15H32N2O4	Alpha amino acid esters	TVGHAZKZWTUDJR-UHFFFAOYSA-N	O=C(OCC)C(NCC)CCN(CCOC)C(C)COC
218	5-[2-methoxyethyl-(2-methoxy-1-methyl-ethyl)amino]-2-methyl-2-(methylamino)valeric acid methyl ester	4.1419	-1	-1		C15H32N2O4		AOVBOMGFDQAMON-UHFFFAOYSA-N	O=C(OC)C(NC)(C)CCCN(CCOC)C(C)COC
219	1-[2-(2-methoxyethoxy)ethyl]-3-[2-[3-methoxypropyl(methyl)amino]ethyl]-2-methyl-guanidine	4.137	-1	-1		C14H32N4O3	Guanidines	NLEIOAIDVOZDPF-UHFFFAOYSA-N	N(=C(NCCOCCOC)NCCN(C)CCCOC)C
220	(3R,4R)-5-ethoxy-3-(ethoxythio)-2,4,6,7-tetramethyl-nonane	4.1301	-1	-1		C17H36O2S	Organic thioperoxides	AQBRHHTXJVTFHF-VTMVDAKESA-N	O(SC(C(C)C)C(C)C(OCC)C(C)C(C)CC)CC
221	N-[3-[4-(3-aminopropoxy)butoxy]propyl]carbamic acid tert-butyl ester	4.1276	-1	-1		C15H32N2O4	Carbamate esters	KBKPMBHJVGMJKX-UHFFFAOYSA-N	O=C(OC(C)(C)C)NCCCOCCCCOCCCN
222	2-isopropyl-2,4,4-trimethyl-valeric acid [tert-butyl(dimethyl)sulfuranyl] ester	4.1197	-1	-1		C17H36O2S	Monocarboxylic acids and derivatives	QCDVIMNICSQCRS-UHFFFAOYSA-N	O=C(OS(C)(C)C(C)(C)C)C(C)(CC(C)(C)C)C(C)C
223	4-[2-[2-(ethylamino)ethylamino]ethylamino]-N-[2-(2-hydroxyethoxy)ethyl]butyramide	4.1119	-1	-1		C14H32N4O3		RQZJHSREMSIXGW-UHFFFAOYSA-N	O=C(NCCOCCO)CCCNCCNCCNCC
224	1-[3-(2-methoxyethoxy)propyl]-3-[2-[2-methoxyethyl(methyl)amino]ethyl]-2-methyl-guanidine	4.1075	-1	-1		C14H32N4O3	Guanidines	BJDGEQIGQAKHHD-UHFFFAOYSA-N	N(=C(NCCN(C)CCOC)NCCCOCCOC)C
225	N-(2-butoxyethyl)-3-[2-[2-(ethylamino)ethoxy]ethoxy]propionamide	4.1033	-1	-1		C15H32N2O4		KZYWSKZDBKJGEX-UHFFFAOYSA-N	O=C(NCCOCCCC)CCOCCOCCNCC
226	heptadecane-1-sulfinic acid	4.0591	-1	-1		C17H36O2S	Sulfinic acids	HBSICLXJSKEUTN-UHFFFAOYSA-N	O=S(O)CCCCCCCCCCCCCCCCC
227	4-(6-mercapto-1,1,3,3,5,5-hexamethyl-hexoxy)-2-methyl-butan-2-ol	4.0349	-1	-1		C17H36O2S	Tertiary alcohols	CSICDIITIOTVMF-UHFFFAOYSA-N	OC(C)(C)CCOC(C)(C)CC(C)(C)CC(C)(C)CS
228	2-[4-(2,3-dimethylbutoxy)-3,3,4-trimethyl-pentoxy]propane-2-thiol	4.0331	-1	-1		C17H36O2S		NAXYNGPXSFXPPE-UHFFFAOYSA-N	SC(OCCC(C)(C)C(OCC(C)C(C)C)(C)C)(C)C
229	2-tert-butyl-2,4,4-trimethyl-valeric acid 2-trimethylsulfuranylethyl ester	4.0306	-1	-1		C17H36O2S		NHRMGHBYJYNNKU-UHFFFAOYSA-N	O=C(OCCS(C)(C)C)C(C)(CC(C)(C)C)C(C)(C)C
230	3-[4-keto-4-[2-(trimethylammonio)ethoxy]butanoyl]oxypropyl-trimethyl-ammonium	4.0121	-1	-1		C15H32N2O4	Acyl cholines	CPSQORHYAGIIBI-UHFFFAOYSA-N	O=C(OCCC[N+](C)(C)C)CCC(=O)OCC[N+](C)(C)C
231	N-(4-carbamoylcyclohexyl)carbamic acid tert-butyl ester;ethane;hydrazine	4.0044	-1	-1		C14H32N4O3		IJDIQDTUWUSOTD-UHFFFAOYSA-N	O=C(OC(C)(C)C)NC1CCC(C(=O)N)CC1.NN.CC
232	3-[3-[5-(2-hydroxyethylamino)pentylamino]propylamino]propylcarbamic acid	3.9872	-1	-1		C14H32N4O3		WFUUJDIUYMBSAC-UHFFFAOYSA-N	O=C(O)NCCCNCCCNCCCCCNCCO
233	acetic acid triamylsulfuranyl ester	3.9772	-1	-1		C17H36O2S		PJKJMUKEDDXDTN-UHFFFAOYSA-N	O=C(OS(CCCCC)(CCCCC)CCCCC)C
234	2-[5-keto-5-[2-(trimethylammonio)ethoxy]pentanoyl]oxyethyl-trimethyl-ammonium	3.9519	-1	-1		C15H32N2O4	Acyl cholines	ZVUGHBKYQDHRPU-UHFFFAOYSA-N	O=C(OCC[N+](C)(C)C)CCCC(=O)OCC[N+](C)(C)C
235	N-[1,1-bis(aminomethyl)-2-(methylamino)ethyl]-4-keto-butyramide;2-methoxy-2-methyl-propane	3.95	-1	-1		C14H32N4O3		VZBQDDZHWHYQMD-UHFFFAOYSA-N	O=CCCC(=O)NC(CN)(CN)CNC.O(C)C(C)(C)C
236	3-[3-keto-3-[3-(trimethylammonio)propoxy]propanoyl]oxypropyl-trimethyl-ammonium	3.8861	-1	-1		C15H32N2O4	Dicarboxylic acids and derivatives	IIRUHLWKCHZWCY-UHFFFAOYSA-N	O=C(OCCC[N+](C)(C)C)CC(=O)OCCC[N+](C)(C)C
237	1-(4-methylsulfinylbutoxy)dodecane	3.7783	-1	-1		C17H36O2S	Sulfoxides	GTNRXWGRSIKSBX-UHFFFAOYSA-N	O=S(C)CCCCOCCCCCCCCCCCC
238	6-aminohexylamine;2,4-diethylglutaric acid	3.7772	-1	-1		C15H32N2O4	Medium-chain fatty acids	VAYZCQSFOHWBNQ-UHFFFAOYSA-N	O=C(O)C(CC)CC(C(=O)O)CC.NCCCCCCN
239	1-neopentylsulfonyldodecane	3.7556	-1	-1		C17H36O2S	Sulfones	IKAXUJCJANEOAH-UHFFFAOYSA-N	O=S(=O)(CCCCCCCCCCCC)CC(C)(C)C
240	6-(1,2-dimethylpropylsulfonyl)-2,3,7-trimethyl-nonane	3.7285	-1	-1		C17H36O2S		OHCRDCVFVASJFN-UHFFFAOYSA-N	O=S(=O)(C(C)C(C)C)C(CCC(C)C(C)C)C(C)CC
241	1-(1-ethylpropylsulfonyl)dodecane	3.7265	-1	-1		C17H36O2S	Sulfones	KPFAIFXVJUIFCM-UHFFFAOYSA-N	O=S(=O)(CCCCCCCCCCCC)C(CC)CC
242	1-amylsulfonyldodecane	3.7262	-1	-1		C17H36O2S	Sulfones	HGDNPUZVRZIXNM-UHFFFAOYSA-N	O=S(=O)(CCCCC)CCCCCCCCCCCC
243	1-mesyl-4,13-dimethyl-tetradecane	3.7146	-1	-1		C17H36O2S	Sulfones	IKTCBVXHAWBGCQ-UHFFFAOYSA-N	O=S(=O)(C)CCCC(C)CCCCCCCCC(C)C
244	1-heptylsulfonyldecane	3.7144	-1	-1		C17H36O2S	Sulfones	NHPSVZSWTMOYJQ-UHFFFAOYSA-N	O=S(=O)(CCCCCCC)CCCCCCCCCC
245	1-mesylhexadecane	3.7116	-1	-1		C17H36O2S	Sulfones	PWWSZHGNCALONE-UHFFFAOYSA-N	O=S(=O)(C)CCCCCCCCCCCCCCCC
246	1-esylpentadecane	3.7116	-1	-1		C17H36O2S		XBNASBKRKZXXKF-UHFFFAOYSA-N	O=S(=O)(CC)CCCCCCCCCCCCCCC
247	2-[(2-acetamidoacetyl)amino]-6-amino-hexanamide;ethane	3.7111	-1	-1		C14H32N4O3		IRWUDPLCEXJCMM-UHFFFAOYSA-N	O=C(NCC(=O)NC(C(=O)N)CCCCN)C.CC.CC
248	1-propylsulfonyltetradecane	3.7103	-1	-1		C17H36O2S	Sulfones	NYOHRYFCIIITEQ-UHFFFAOYSA-N	O=S(=O)(CCC)CCCCCCCCCCCCCC
249	7-(mesylmethyl)pentadecane	3.7081	-1	-1		C17H36O2S		TZNDICCPXCOBLB-UHFFFAOYSA-N	O=S(=O)(C)CC(CCCCCC)CCCCCCCC
250	cadaverine;sebacic acid	3.7043	-1	-1		C15H32N2O4	Medium-chain fatty acids	AARROMHWSQDDKO-UHFFFAOYSA-N	O=C(O)CCCCCCCCC(=O)O.NCCCCCN
251	1-octylsulfonylnonane	3.6906	-1	-1		C17H36O2S	Sulfones	SRTYYGNGYWDSKW-UHFFFAOYSA-N	O=S(=O)(CCCCCCCC)CCCCCCCCC
252	2-piperazinoethanol;2-(2-piperazinoethoxy)ethanol	3.6675	-1	-1		C14H32N4O3		KAQDMFWEEIFVQY-UHFFFAOYSA-N	OCCOCCN1CCNCC1.OCCN1CCNCC1
253	7-(3-mesylpropyl)tridecane	3.6508	-1	-1		C17H36O2S		YQGHUAWCLOAZKN-UHFFFAOYSA-N	O=S(=O)(C)CCCC(CCCCCC)CCCCCC
254	6-aminohexylamine;azelaic acid	3.6445	-1	-1		C15H32N2O4	Medium-chain fatty acids	LQNCHIQVPSEFRS-UHFFFAOYSA-N	O=C(O)CCCCCCCC(=O)O.NCCCCCCN
255	2-[4-(2-hydroxyethyl)piperazino]ethanol;2-piperazinoethanol	3.6334	-1	-1		C14H32N4O3		UHXOSGQFMOQKLG-UHFFFAOYSA-N	OCCN1CCNCC1.OCCN1CCN(CCO)CC1
256	4-(4-aminobutylamino)-4-keto-butyric acid;6-aminohexylamine	3.5878	-1	-1		C14H32N4O3		ZZDHNULPXINDNF-UHFFFAOYSA-N	O=C(O)CCC(=O)NCCCCN.NCCCCCCN
257	2-(2-aminoethylamino)ethanol;but-3-en-2-one;enanthic acid	3.5695	-1	-1		C15H32N2O4	Medium-chain fatty acids	KENZEHUDPOGRJI-UHFFFAOYSA-N	O=C(O)CCCCCC.O=C(C=C)C.OCCNCCN
258	2,3-dimethylbut-1-ene;methanethiol;methanol;3-propyl-7-oxabicyclo[4.1.0]heptane	3.5498	-1	-1		C17H36O2S		RECRKFISNNEJCZ-UHFFFAOYSA-N	OC.SC.O1C2CCC(CCC)CC12.C=C(C)C(C)C
259	(2S)-2-aminoglutaric acid;decylamine	3.5189	-1	-1		C15H32N2O4	Glutamic acid and derivatives	MSQCMFLALHZASZ-HVDRVSQOSA-N	O=C(O)CCC(N)C(=O)O.NCCCCCCCCCC
260	adipic acid;9-aminononylamine	3.517	-1	-1		C15H32N2O4	Medium-chain fatty acids	SLGKMEWRPGGYRI-UHFFFAOYSA-N	O=C(O)CCCCC(=O)O.NCCCCCCCCCN
261	ethane;N-(2-ketoethyl)-3-methyl-2-(methylamino)butyramide;propylurea	3.4866	-1	-1		C14H32N4O3		IGLRUILRSCTIJD-UHFFFAOYSA-N	O=CCNC(=O)C(NC)C(C)C.O=C(N)NCCC.CC
262	ethane;5-ketopentylurea;3-methyl-2-(methylamino)butyramide	3.3809	-1	-1		C14H32N4O3		BUDUONBOBGJIPS-UHFFFAOYSA-N	O=CCCCCNC(=O)N.O=C(N)C(NC)C(C)C.CC
263		-1	-1	-1		C10H28N10O

## Sheet: Compound 6
File path: C:\Users\yilu\Downloads\Data from laptop\Software_Yi\MSFINDER ver 3.50\MSDIAL_TEMP\2020_7_18_1512_LBORN0254_BC6_01_22446_13_8.86_377.27.mat
File name: 2020_7_18_1512_LBORN0254_BC6_01_22446_13_8.86_377.27
Title: Unknown
MS1 count: 2570
MSMS count: 166
PRECURSORMZ: 377.2688
PRECURSORTYPE: [M+H]+
Intensity: 59810
Retention time: 8.86165
Retention index: 0
Rank	Formula	Mass	Mass error	Score	Resources
1	C23H36O4	376.261	-0.0001639	4.162	HMDB,KNApSAcK,ChEBI,FooDB,BMDB,LipidMAPS,UNPD,BLEXP,MINE
2	C18H36N2O6	376.257	-0.0041867	3.907	STOFF,BLEXP
3	C18H32N8O	376.27	0.0083841	3.534	BLEXP
4	C17H37N4O3P	376.26	-0.0011959	3.449
5	C14H41N4O3PS	376.264	0.0021753	3.433
6	C16H36N6O2S	376.262	0.0005218	3.406
7	C19H32N6O2	376.259	-0.0028493	3.353
8	C11H36N8O4S	376.258	-0.0035009	3.353
9	C13H32N10O3	376.266	0.0043613	3.349
10	C13H40N6O2S2	376.265	0.003893	3.296
11	C14H32N8O4	376.255	-0.006872	3.244
12	C17H36N4O5	376.269	0.0070467	3.242
13	C16H44N2OS3	376.262	5.35e-05	3.229
14	C9H28N16O	376.263	0.001676	3.227
15	C19H40N2OS2	376.258	-0.0033176	3.215
16	C20H40O4S	376.265	0.0032072	3.214
17	C14H40N4O3S2	376.254	-0.0073404	3.182
18	C17H45O2PS2	376.26	-0.0016642	3.164
19	C10H36N10O3S	376.269	0.0077325	3.128
20	C12H32N12S	376.259	-0.0021635	3.121
21	C15H41N2O4PS	376.252	-0.0090581	3.119
22	C24H32N4	376.263	0.0011735	3.109
23	C9H36N12S2	376.263	0.0012076	3.089
24	C22H36N2OS	376.255	-0.0066888	3.088
25	C20H41O2PS	376.256	-0.0050354	3.085
26	C17H44O4S2	376.268	0.0065783	3.042
27	C21H36N4S	376.266	0.0045446	3.036
28	C15H28N12	376.256	-0.0055347	3.009
29	C10H28N14O2	376.252	-0.0095574	2.965
30	C23H37O2P	376.253	-0.0084065	2.888
31	C18H40N4S2	376.269	0.0079157	2.846
File path: C:\Users\yilu\Downloads\Data from laptop\Software_Yi\MSFINDER ver 3.50\MSDIAL_TEMP\2020_7_18_1512_LBORN0254_BC6_01_22446_13_8.86_377.27.mat
File name: 2020_7_18_1512_LBORN0254_BC6_01_22446_13_8.86_377.27
Title: Unknown
MS1 count: 2570
MSMS count: 166
PRECURSORMZ: 377.2688
PRECURSORTYPE: [M+H]+
Intensity: 59810
Retention time: 8.86165
Retention index: 0
Rank	Title	Score	Retention time	Retention index	Resources	Formula	Ontology	InChIKey	SMILES
1	MG(0:0/20:5(5Z,8Z,11Z,14Z,17Z)/0:0)	7.362	-1	-1	HMDB=HMDB0011550,ChEBI=CHEBI:86398,FooDB=FDB028263,BMDB=BMDB11550,LipidMAPS=LMGL01010026	C23H36O4	Endocannabinoids	IXSYVBCFIGEECR-JLNKQSITSA-N	O=C(OC(CO)CO)CCCC=CCC=CCC=CCC=CCC=CCC
2	(5Z,8Z,11Z,14Z,17Z)-eicosa-5,8,11,14,17-pentaenoic acid (2-hydroxy-1-methylol-ethyl) ester	7.362	-1	-1	HMDB=HMDB0011550,ChEBI=CHEBI:86398,FooDB=FDB028263,BMDB=BMDB11550,LipidMAPS=LMGL01010026	C23H36O4	Endocannabinoids	IXSYVBCFIGEECR-JLNKQSITSA-N	O=C(OC(CO)CO)CCCC=CCC=CCC=CCC=CCC=CCC
3	9'-Carboxy-gamma-chromanol	7.3362	-1	-1	HMDB=HMDB0012868,FooDB=FDB029192	C23H36O4	1-benzopyrans	ODQOKHVJIYTOQE-NXHTTZLHSA-N	O=C(O)C(C)CCCC(C)CCCC1(OC2=C(C(=C(O)C=C2CC1)C)C)C
4	(2S,6R)-9-[(2R)-6-hydroxy-2,7,8-trimethyl-chroman-2-yl]-2,6-dimethyl-pelargonic acid	7.3362	-1	-1	HMDB=HMDB0012868,FooDB=FDB029192	C23H36O4	1-benzopyrans	ODQOKHVJIYTOQE-VBURHUQHSA-N	O=C(O)C(C)CCCC(C)CCCC1(OC2=C(C(=C(O)C=C2CC1)C)C)C
5	MG(20:5(5Z,8Z,11Z,14Z,17Z)/0:0/0:0)	7.2645	-1	-1	HMDB=HMDB0011580,FooDB=FDB028293,BMDB=BMDB11580	C23H36O4	Monoacylglycerols	DFRRSBYSSXKROX-GABUGCEHSA-N	O=C(OCC(O)CO)CCCC=CCC=CCC=CCC=CCC=CCC
6	(5Z,8Z,11Z,14Z,17Z)-eicosa-5,8,11,14,17-pentaenoic acid [(2S)-2,3-dihydroxypropyl] ester	7.2645	-1	-1	HMDB=HMDB0011580,FooDB=FDB028293,BMDB=BMDB11580	C23H36O4	Monoacylglycerols	DFRRSBYSSXKROX-GABUGCEHSA-N	O=C(OCC(O)CO)CCCC=CCC=CCC=CCC=CCC=CCC
7	Andavadoic acid;(+)-Andavadoic acid	7.2188	-1	-1	KNApSAcK=C00044517,UNPD=UNPD93665	C23H36O4	Benzene and substituted derivatives	LSOSWFXHGHKMMC-VVWGFWRPNA-N	O=C(O)CC1(OOC(C)(CCCCCCCCCCC=2C=CC=CC2)C1)C
8	(2S)-2-methylbutyric acid [(1S,7S,8S,8aR)-8-[2-[(2R,4S)-4-hydroxytetrahydropyran-2-yl]ethyl]-7-methyl-1,2,3,7,8,8a-hexahydronaphthalen-1-yl] ester	7.1844	-1	-1	ChEBI=CHEBI:125479	C23H36O4	Fatty acid esters	PCRLJXQATRCBPW-SOWWUCBVSA-N	O=C(OC1CCC=C2C=CC(C)C(CCC3OCCC(O)C3)C21)C(C)CC
9	(2S)-2-methylbutanoic acid [(1S,7S,8S,8aR)-8-[2-[(2R,4S)-4-hydroxy-2-oxanyl]ethyl]-7-methyl-1,2,3,7,8,8a-hexahydronaphthalen-1-yl] ester	7.173	-1	-1	ChEBI=CHEBI:125479	C23H36O4	Fatty acid esters	PCRLJXQATRCBPW-ZJQWJJJPNA-N	O=C(OC1CCC=C2C=CC(C)C(CCC3OCCC(O)C3)C21)C(C)CC
10	propan-2-yl (Z)-7-[(1R,2S)-2-[(E,3S)-3-hydroxyoct-1-enyl]-5-oxocyclopent-3-en-1-yl]hept-5-enoate	7.1545	-1	-1	BLEXP=BLEXPDB00006437828	C23H36O4	Prostaglandins and related compounds	MYNMJEGQTXQGKQ-RXMNKVFOSA-N	O=C(OC(C)C)CCCC=CCC1C(=O)C=CC1C=CC(O)CCCCC
11	3-Acetyl-5alpha-androstane-3beta,17beta-diol 3-acetate	7.1153	-1	-1	ChEBI=CHEBI:79675	C23H36O4	Steroid esters	CQNXXURIGGLIOE-FTQGCKHGSA-N	O=C(OC1(C(=O)C)CCC2(C)C(CCC3C4CCC(O)C4(C)CCC32)C1)C
12	acetic acid [(3S,5S,8R,9S,10S,13S,14S,17S)-3-acetyl-17-hydroxy-10,13-dimethyl-1,2,4,5,6,7,8,9,11,12,14,15,16,17-tetradecahydrocyclopenta[a]phenanthren-3-yl] ester	7.1153	-1	-1	ChEBI=CHEBI:79675	C23H36O4	Steroid esters	CQNXXURIGGLIOE-FTQGCKHGSA-N	O=C(OC1(C(=O)C)CCC2(C)C(CCC3C4CCC(O)C4(C)CCC32)C1)C
13	Broussonetone C;(-)-Broussonetone C	7.1044	-1	-1	KNApSAcK=C00038652	C23H36O4	Ketals	ISGRVSGPQTWWAS-ILPJFDCQNA-N	O=C1C(O)C23CC(CCC2C4(C)CCCC(C)(C)C14)C5(OCC(O5)(C)C)C3
14	Ardisiphenol A	6.9863	-1	-1	KNApSAcK=C00032721;C00032722,ChEBI=CHEBI:65431,UNPD=UNPD26123	C23H36O4	Phenol esters	QIOIOJNMBXOYMA-HJWRWDBZSA-N	O=C(OC=1C(O)=CC(O)=CC1CCCCCCCC=CCCCCCC)C
15	acetic acid [2,4-dihydroxy-6-[(Z)-pentadec-8-enyl]phenyl] ester	6.9863	-1	-1	KNApSAcK=C00032721;C00032722,ChEBI=CHEBI:65431,UNPD=UNPD26123	C23H36O4	Phenol esters	QIOIOJNMBXOYMA-HJWRWDBZSA-N	O=C(OC=1C(O)=CC(O)=CC1CCCCCCCC=CCCCCCC)C
16	5alpha-Androstane-3beta,17beta-diol diacetate	6.8933	-1	-1	ChEBI=CHEBI:79848,UNPD=UNPD187624;UNPD75632;UNPD85308;UNPD88948;UNPD95260	C23H36O4	Steroid esters	BQIBBYLXJDSLIR-FTQGCKHGSA-N	O=C(OC1CCC2(C)C(CCC3C4CCC(OC(=O)C)C4(C)CCC32)C1)C
17	acetic acid [(3S,5S,8R,9S,10S,13S,14S,17S)-17-acetoxy-10,13-dimethyl-2,3,4,5,6,7,8,9,11,12,14,15,16,17-tetradecahydro-1H-cyclopenta[a]phenanthren-3-yl] ester	6.8893	-1	-1	ChEBI=CHEBI:79848,UNPD=UNPD187624;UNPD75632;UNPD85308;UNPD88948;UNPD95260	C23H36O4	Steroid esters	BQIBBYLXJDSLIR-FTQGCKHGSA-N	O=C(OC1CCC2(C)C(CCC3C4CCC(OC(=O)C)C4(C)CCC32)C1)C
18	[12]-Gingerdione	6.8323	-1	-1	HMDB=HMDB0039278,FooDB=FDB018823,UNPD=UNPD43151	C23H36O4	Gingerdiones	SRGFWRMSKPVJOD-UHFFFAOYSA-N	O=C(CC(=O)CCCCCCCCCCC)CCC1=CC=C(O)C(OC)=C1
19	UNPD62647	6.5496	-1	-1	UNPD=UNPD62647	C23H36O4	Colensane and clerodane diterpenoids	GFZYQMFUZFAJJA-YCOJRBCONA-N	O=C1C(O)=C(C)C2(C)CCC3CC(C)(CCC3(C)C2C1)C4OC(OC4)(C)C
20	UNPD175949	6.4727	-1	-1	UNPD=UNPD175949	C23H36O4	Dicarboxylic acids and derivatives	ZWUPHEFSAPZXKG-UVNFKDEANA-N	O=C(OCC=C(C)CCC1(C2=CCCC(C(=O)O)(C)C2CCC1C)C)CC
21	UNPD51118	6.4349	-1	-1	UNPD=UNPD51118	C23H36O4	Kaurane diterpenoids	KSBWYVWJKJFHHV-CDPOIHHWNA-N	O=C(O)C1(C)CCCC2(C)C1CCC34CC(CCC32)C5(OC(OC5)(C)C)C4
22	UNPD207354	6.4251	-1	-1	UNPD=UNPD207354	C23H36O4	Diterpenoids	ZLTFLFCUZANMSK-UIYOSGQUNA-N	O=C1C(OC)=C(O)C(O)C(CC=C(C)CCC=C(C)CCC=C(C)C)C1C
23	N,N,N',N'-tetrakis(2-hydroxypropyl)adipamide	6.4236	-1	-1	STOFF=STOFF_8057	C18H36N2O6	N-acyl amines	UUCAVBDCVCFNIN-UHFFFAOYNA-N	O=C(N(CC(O)C)CC(O)C)CCCCC(=O)N(CC(O)C)CC(O)C
24	UNPD146547	6.4183	-1	-1	UNPD=UNPD146547	C23H36O4	1,2-dioxanes	WRPATCGRZLPNBQ-VVWGFWRPNA-N	O=C(O)CCC1(OOC(C)(CCCCCCCCC=2C=CC=CC2)CC1)C
25	3-[(3R,6S)-3,6-dimethyl-6-(8-phenyloctyl)dioxan-3-yl]propionic acid	6.4183	-1	-1	UNPD=UNPD146547	C23H36O4	1,2-dioxanes	WRPATCGRZLPNBQ-GOTSBHOMSA-N	O=C(O)CCC1(OOC(C)(CCCCCCCCC=2C=CC=CC2)CC1)C
26	UNPD54413	6.4129	-1	-1	UNPD=UNPD54413;UNPD97494	C23H36O4	1,2-dioxanes	FYBDKPKXLFVFLO-XWWDZEAUNA-N	O=C(O)C(C)C1OOC(C)(CCC=C2CC3=C(CC2)C(C)(C)CCC3)CC1
27	4,7,13,16,21,24-hexaoxa-1,10-diazabicyclo[8.8.8]hexacosane	6.4048	-1	-1	BLEXP=BLEXPDB00000072801	C18H36N2O6	Trialkylamines	AUFVJZSDSXXFOI-UHFFFAOYSA-N	O1CCOCCN2CCOCCOCCN(CC1)CCOCCOCC2
28	UNPD3412	6.395	-1	-1	UNPD=UNPD3412	C23H36O4	Diterpenoids	FZZZJIOSXJRBPW-VGJLFGJWNA-N	OCC(=C)C1CCC2C(=CCC3C4(C)COC(OC4CCC23C)(C)C)C1O
29	UNPD171651	6.3927	-1	-1	UNPD=UNPD171651	C23H36O4	Colensane and clerodane diterpenoids	REDDUHSMHMZNBA-WFDSYPQXNA-N	O=C(OC)C=C(C)CCC1(C)C(C)C(OC(=O)C)CC2(C(=CCCC21)C)C
30	UNPD72279	6.3738	-1	-1	UNPD=UNPD72279	C23H36O4	Diterpenoids	LODVZNAZFNRTCG-GVXGJFAZNA-N	O=C(OC)C=C(C)CCC1C(=C)CCC2C(C)(C)C(OC(=O)C)CCC12C
31	UNPD162663	6.3633	-1	-1	UNPD=UNPD162663	C23H36O4	Kaurane diterpenoids	GPDYNSLXYAITQJ-STEMSUDANA-N	O=C1C(O)C23CC(CCC2C4(C)CCCC(C)(C)C14)C5(OC(OC5)(C)C)C3
32	UNPD75058	6.3618	-1	-1	UNPD=UNPD75058	C23H36O4	Fatty alcohol esters	OXFASGUJQBAINI-UNXIYLRDNA-N	O=C(OC(C=CCCCCCCCC=1C=C(O)C=C(O)C1)CCCCC)C
33	(1'R,2'S,4R,4'R,9'S,10'S,13'S)-2'-hydroxy-2,2,5',5',9'-pentamethyl-spiro[1,3-dioxolane-4,14'-tetracyclo[11.2.1.01,10.04,9]hexadecane]-3'-one	6.3617	-1	-1	UNPD=UNPD162663	C23H36O4	Kaurane diterpenoids	GPDYNSLXYAITQJ-SKUUYEPTSA-N	O=C1C(O)C23CC(CCC2C4(C)CCCC(C)(C)C14)C5(OC(OC5)(C)C)C3
34	acetic acid [(3S,5R,8R,9S,10S,13R,14S,17S)-17-acetyl-14-hydroxy-10,13-dimethyl-1,2,3,4,5,6,7,8,9,11,12,15,16,17-tetradecahydrocyclopenta[a]phenanthren-3-yl] ester	6.3613	-1	-1	UNPD=UNPD175840;UNPD3684	C23H36O4	Steroid esters	XMMWYJKJRBYBKW-UUSJCSPQSA-N	O=C(OC1CCC2(C)C(CCC3C2CCC4(C)C(C(=O)C)CCC34O)C1)C
35	UNPD152586	6.3608	-1	-1	UNPD=UNPD152586	C23H36O4	Steroid esters	KWOUHQLFAVONNL-WJOKDJHPNA-N	O=C(OC1CCC2(C)C3C(=O)CC4(C)C(CCC4C3CCC2C1)C(O)C)C
36	acetic acid [(3S,5S,8S,9S,10S,13S,14S,17S)-17-(1-hydroxyethyl)-11-keto-10,13-dimethyl-1,2,3,4,5,6,7,8,9,12,14,15,16,17-tetradecahydrocyclopenta[a]phenanthren-3-yl] ester	6.3608	-1	-1	UNPD=UNPD152586	C23H36O4	Steroid esters	KWOUHQLFAVONNL-HKLCOPGFSA-N	O=C(OC1CCC2(C)C3C(=O)CC4(C)C(CCC4C3CCC2C1)C(O)C)C
37	UNPD165326	6.3606	-1	-1	UNPD=UNPD165326;UNPD169764	C23H36O4	Gluco/mineralocorticoids, progestogins and derivatives	RRIGGXWWSAHMHN-IPOHFGAFNA-N	O=C(OC1(C(=O)C)CCC2C3CCC4CC(O)CCC4(C)C3CCC21C)C
38	UNPD144835	6.3589	-1	-1	UNPD=UNPD144835	C23H36O4	Colensane and clerodane diterpenoids	NCNDQESGCYQNDF-WFDSYPQXNA-N	O=C(OC)C=C(C)CCC1(C)C(C)CC(OC(=O)C)C2(C(=CCCC21)C)C
39	UNPD63734	6.3578	-1	-1	UNPD=UNPD63734	C23H36O4	Medium-chain hydroxy acids and derivatives	NWIKBGYADOTXFL-NIUCMREJNA-N	O=C(O)CCCCCC=CCC=1C(=O)CCC1C=CC(O)(C)CCCCC
40	UNPD175840	6.3568	-1	-1	UNPD=UNPD175840;UNPD3684	C23H36O4	Steroid esters	XMMWYJKJRBYBKW-KWVLIQTLNA-N	O=C(OC1CCC2(C)C(CCC3C2CCC4(C)C(C(=O)C)CCC34O)C1)C
41	UNPD154656	6.3466	-1	-1	UNPD=UNPD154656	C23H36O4	Fatty acid esters	RYNXSVDLWWRGRW-JQXBDWKINA-N	O=C(OC)CC1(OOC(C)(CC(C)CCCCCCC=2C=CC=CC2)C1)C
42	UNPD179235	6.3352	-1	-1	UNPD=UNPD179235	C23H36O4	Naphthopyrans	JCRLDSCFBFVIJA-IHJQXEPZNA-N	O=CC1C(OC23CCC1C3(C)CCC4C2CCC5(O)CC(O)CCC45C)C
43	UNPD141344	6.3311	-1	-1	UNPD=UNPD141344	C23H36O4	Diterpenoids	PVJXQMWBXKQERR-BSKGAIDONA-N	O=C(OCC=C(C)CCC1=C(C)CCC2C(C(=O)OC)(C)CCCC12C)C
44	UNPD66042	6.3307	-1	-1	UNPD=UNPD66042	C23H36O4	Diterpenoids	ZJEFKGVIZYMGJT-SLXGXDSFNA-N	O=C(OC)C=C(C)CCC1=C(C)CCC2C1(C)CCCC2(C)COC(=O)C
45	UNPD165433	6.3294	-1	-1	UNPD=UNPD165433;UNPD57050	C23H36O4	21-hydroxysteroids	AGKUVCXEPCJNMJ-VSBGUMLONA-N	O=C(OC1CCC2(C)C(CCC3C4CCC(C(=O)CO)C4(C)CCC32)C1)C
46	UNPD144490	6.3268	-1	-1	UNPD=UNPD144490;UNPD47527	C23H36O4	Diterpenoids	PXOFARYWBBMFBJ-GTUMOSRHNA-N	O=C(OC=C1CC(OC)OC1CC2C(=C)CCC3C(C)(C)CCCC23C)C
47	UNPD185525	6.3244	-1	-1	UNPD=UNPD185525;UNPD20342	C23H36O4	Dicarboxylic acids and derivatives	PRNUAUBEIUTBMQ-HVXCVXLUNA-N	O=C(OCC=C(C)CCC1(C2=CCCC(C(=O)OC)(C)C2CCC1C)C)C
48	UNPD229036	6.3149	-1	-1	UNPD=UNPD229036	C23H36O4	Ketals	ZAFBDBZIQHIUHT-GFEDBVBQSA-N	OC1C2=C3C(OC2)C4C5OC(OC5C(C(C)C)C4(C)CCC3(C)CC1)(C)C
49	UNPD70151	6.3128	-1	-1	UNPD=UNPD70151	C23H36O4	Prostaglandins and related compounds	WWSMKXNAXIUSFM-GEKZRRBLNA-N	O=C(OC)CCC12CC32CCC4(C(=O)CCC4(C)C3CCC1C(O)(C)C)C
50	UNPD109425	6.3073	-1	-1	UNPD=UNPD109425;UNPD12817;UNPD43851;UNPD54840	C23H36O4	Steroid esters	TVQDBRRFOFGWDS-ABGUHJNWNA-N	O=C(OC1CCC2(C)C(CCC3C2CCC4(C)C3CCC4(O)C(=O)C)C1)C
51	acetic acid [(3S,5S,8R,9S,10S,13S,14S,17R)-17-acetyl-17-hydroxy-10,13-dimethyl-1,2,3,4,5,6,7,8,9,11,12,14,15,16-tetradecahydrocyclopenta[a]phenanthren-3-yl] ester	6.3073	-1	-1	UNPD=UNPD109425;UNPD12817;UNPD43851;UNPD54840	C23H36O4	Steroid esters	TVQDBRRFOFGWDS-LQHFQCQCSA-N	O=C(OC1CCC2(C)C(CCC3C2CCC4(C)C3CCC4(O)C(=O)C)C1)C
52	UNPD58423	6.2981	-1	-1	UNPD=UNPD58423	C23H36O4	Diterpenoids	AORYFYLFZDBOMS-LKYXMULBNA-N	O=C(OCC=C(C)CCC1C(=C)CCC2C(C(=O)OC)(C)CCCC12C)C
53	UNPD119893	6.298	-1	-1	UNPD=UNPD119893;UNPD126988;UNPD148254;UNPD85120	C23H36O4	Diterpenoids	KMEQUVNVNHTHSM-LYCDUQHBNA-N	O=C(OC)C=C(C)CCC1C(=C)CCC2C(C)(COC(=O)C)CCCC12C
54	4-[(4-amino-6-piperidin-1-yl-1,3,5-triazin-2-yl)methyl]-N,N-diethylpiperazine-1-carboxamide	6.2647	-1	-1	BLEXP=BLEXPDB00000210925	C18H32N8O	Piperazine carboxamides	UQJDBHDCPWOBGL-UHFFFAOYSA-N	O=C(N(CC)CC)N1CCN(CC=2N=C(N=C(N2)N3CCCCC3)N)CC1
55	UNPD4041	6.2635	-1	-1	UNPD=UNPD4041	C23H36O4	Diterpenoids	GBTQZZZCLLAVKN-WHEUHYIONA-N	O=C(O)CC(=O)OCC=C(C)CCC1C(=C)CCC2C(C)(C)CCCC12C
56	UNPD149754	6.2445	-1	-1	UNPD=UNPD149754	C23H36O4	Diterpenoids	CVECSUVJUDBGMT-WHEUHYIONA-N	O=C(O)CC(=O)OCC=C(C)CCC1C(=CCC2C(C)(C)CCCC12C)C
57	UNPD67572	6.2235	-1	-1	UNPD=UNPD67572	C23H36O4	Diterpenoids	MKWGBCMCATZNPA-SLDIXDLSNA-N	O=C(OC)C=C(C)CC(OC(=O)C)C1C(=C)CCC2C(C)(C)CCCC12C
58	UNPD185622	6.2226	-1	-1	UNPD=UNPD185622	C23H36O4	Colensane and clerodane diterpenoids	PAUQOBKAKRXBDY-JUQCZHMJNA-N	O=C(OC)C=C(C)CCC1(C)C(C)CCC2(C(=CCCC21)COC(=O)C)C
59	UNPD136164	6.2033	-1	-1	UNPD=UNPD136164	C23H36O4	Diterpenoids	SXAKSYSZGTXJGQ-PHGYSKOENA-N	O=C(O)CC(=O)OC1CC2CCC3C(C)(C)CCCC3(C)C42CCC1(C)C4
60	UNPD90546	6.1881	-1	-1	UNPD=UNPD90546	C23H36O4	P-benzoquinones	HWCJPRWEOPYYAN-FPLPWBNLSA-N	O=C1C(O)=C(C(=O)C(OC)=C1C)CCCCCCCCCC=CCCCC
61	UNPD26259	6.1658	-1	-1	UNPD=UNPD26259	C23H36O4	Retinoids	HBSLTDLYTBXQDQ-YTGIAMMFNA-N	O=C(O)CC(=O)OCC=C(C)CCC=C(C)CCC1C(=C)CCCC1(C)C
62	UNPD61750	6.1568	-1	-1	UNPD=UNPD61750	C23H36O4	Colensane and clerodane diterpenoids	OUGJUZBGDQAFCM-HLFJKCRRNA-N	O=C(OC)CC(=O)OCC=C(C)CCC1(C)CCCC2(C(=CCCC21)C)C
63	UNPD90302	6.142	-1	-1	UNPD=UNPD90302	C23H36O4	P-benzoquinones	JUSMPONINWOSBL-KTKRTIGZSA-N	O=C1C=C(O)C(=O)C(=C1O)CCCCCCCC=CCCCCCCCC
64	UNPD105952	6.0758	-1	-1	UNPD=UNPD105952;UNPD125415;UNPD128908	C23H36O4	Steroid esters	XXWONWKXQSOOPO-YGNGTVMBNA-N	O=C(OC1CCC2(C)C(CCC3C2CCC4(C)CC(OC(=O)C)CC34)C1)C
65	(1R,4aR,4bR,10aR)-7-isopropyl-1,4a-dimethyl-2,3,4,4b,5,6,10,10a-octahydrophenanthrene-1-carboxylic acid glyceryl ester	5.9883	-1	-1		C23H36O4	Diterpenoids	HBKBEZURJSNABK-MWJPAGEPSA-N	O=C(OCC(O)CO)C1(C)CCCC2(C)C3C(C=C(CC3)C(C)C)=CCC12
66	(1R,4aR,4bR,10aR)-7-isopropyl-1,4a-dimethyl-2,3,4,4b,5,6,10,10a-octahydrophenanthrene-1-carboxylic acid (2-hydroxy-1-methylol-ethyl) ester	5.9769	-1	-1		C23H36O4	Diterpenoids	ZDZHCVAZYJEHQR-KKSHJYNMSA-N	O=C(OC(CO)CO)C1(C)CCCC2(C)C3C(C=C(CC3)C(C)C)=CCC12
67	(3aS,3bR,5R,5aR,9aR,9bS,11aS)-5-amyl-5-hydroxy-9a,11a-dimethyl-3,3a,3b,4,5a,8,9,9b,10,11-decahydro-2H-indeno[5,4-f]chromene-1,7-quinone	5.9195	-1	-1		C23H36O4	Prostaglandins and related compounds	FPMNKALLYPFOBQ-NDSNRMTASA-N	O=C1OC2C(O)(CCCCC)CC3C4CCC(=O)C4(C)CCC3C2(C)CC1
68	(E)-3-[(3S,5R,8R,9S,10S,13R,14S,17R)-3,14-dihydroxy-10,13-dimethyl-1,2,3,4,5,6,7,8,9,11,12,15,16,17-tetradecahydrocyclopenta[a]phenanthren-17-yl]acrylic acid methyl ester	5.8572	-1	-1		C23H36O4	Androgens and derivatives	KJQKBHZKDSBIPI-IFYJLNHVSA-N	O=C(OC)C=CC1CCC2(O)C3CCC4CC(O)CCC4(C)C3CCC12C
69	UNPD144924	5.8524	-1	-1	UNPD=UNPD144924	C23H36O4	Acyclic diterpenoids	IRJLVLJFWOLRKU-YKBIRWAZSA-N	O=C(O)CC(=O)OCC=C(C)CCC=C(C)CCC=C(C)CCC=C(C)C
70	(Z)-7-[(1R,2S)-2-[(E,3R)-3-hydroxy-4,4-dimethyl-oct-1-enyl]-5-keto-cyclopent-3-en-1-yl]hept-5-enoic acid methyl ester	5.8414	-1	-1		C23H36O4	Prostaglandins and related compounds	KQCVXJWHXUJYAE-NONPEJBBSA-N	O=C(OC)CCCC=CCC1C(=O)C=CC1C=CC(O)C(C)(C)CCCC
71	acetic acid [2-[(3R,5R,8R,9S,10S,13S,14S,17S)-3-hydroxy-10,13-dimethyl-2,3,4,5,6,7,8,9,11,12,14,15,16,17-tetradecahydro-1H-cyclopenta[a]phenanthren-17-yl]-2-keto-ethyl] ester	5.8284	-1	-1		C23H36O4	Gluco/mineralocorticoids, progestogins and derivatives	LNQFXEKUXJUUMN-LSXNRQBNSA-N	O=C(OCC(=O)C1CCC2C3CCC4CC(O)CCC4(C)C3CCC12C)C
72	2-[(3S,5S,8S,9S,10S,13R,14S,17R)-3-acetoxy-10,13-dimethyl-2,3,4,5,6,7,8,9,11,12,14,15,16,17-tetradecahydro-1H-cyclopenta[a]phenanthren-17-yl]acetic acid	5.8163	-1	-1		C23H36O4		IFVNTDMYODIPOG-QFSWKNFVSA-N	O=C(OC1CCC2(C)C(CCC3C4CCC(CC(=O)O)C4(C)CCC32)C1)C
73	acetic acid (17-acetyl-3-hydroxy-10,13-dimethyl-2,3,4,5,6,7,8,9,11,12,14,15,16,17-tetradecahydro-1H-cyclopenta[a]phenanthren-12-yl) ester	5.793	-1	-1		C23H36O4	Gluco/mineralocorticoids, progestogins and derivatives	KKWSHZSKHGWKNI-UHFFFAOYSA-N	O=C(OC1CC2C(CCC3CC(O)CCC32C)C4CCC(C(=O)C)C14C)C
74	(4R)-4-[(3S,5R,8R,9S,10S,13R,14S,17R)-3,14-dihydroxy-10,13-dimethyl-1,2,3,4,5,6,7,8,9,11,12,15,16,17-tetradecahydrocyclopenta[a]phenanthren-17-yl]tetrahydrofuran-2-one	5.7831	-1	-1		C23H36O4	Cardenolides and derivatives	CIQHGVTXALCNSM-ROIXOECXSA-N	O=C1OCC(C1)C2CCC3(O)C4CCC5CC(O)CCC5(C)C4CCC23C
75	5-hydroxy-7-[4-(1-hydroxynonyl)phenyl]hept-6-enoic acid methyl ester	5.768	-1	-1		C23H36O4	Cinnamyl alcohols	QTFPEADYKYLFBY-UHFFFAOYSA-N	O=C(OC)CCCC(O)C=CC1=CC=C(C=C1)C(O)CCCCCCCC
76	UNPD160268	5.7257	-1	-1	UNPD=UNPD160268	C23H36O4	Phenol esters	JUHOZBFDQVTUOE-UHFFFAOYSA-N	O=C(O)C1=CC=C(OC(=O)CCCCCCCCCCCCCCC)C=C1
77	4-hexadecanoyloxybenzoic acid	5.7257	-1	-1	UNPD=UNPD160268	C23H36O4	Phenol esters	JUHOZBFDQVTUOE-UHFFFAOYSA-N	O=C(O)C1=CC=C(OC(=O)CCCCCCCCCCCCCCC)C=C1
78	4-[[(10S,13S,17S)-10,13-dimethyl-2,3,4,5,6,7,8,9,11,12,14,15,16,17-tetradecahydro-1H-cyclopenta[a]phenanthren-17-yl]oxy]-4-keto-butyric acid	5.6843	-1	-1		C23H36O4	Steroid esters	BQOYUBWEBGKHDA-XHEJAPSKSA-N	O=C(O)CCC(=O)OC1CCC2C3CCC4CCCCC4(C)C3CCC12C
79	acetic acid [(5S,10S,13S)-10,13-dimethylspiro[1,2,3,4,5,6,7,8,9,11,12,14,15,16-tetradecahydrocyclopenta[a]phenanthrene-17,2'-1,3-dioxolane]-3-yl] ester	5.654	-1	-1		C23H36O4	Steroid esters	DPBGWNOQXKBDCB-RQCZVXGBSA-N	O=C(OC1CCC2(C)C(CCC3C2CCC4(C)C3CCC54OCCO5)C1)C
80	3-acetoxy-10,13-dimethyl-2,3,4,5,6,7,8,9,11,12,14,15,16,17-tetradecahydro-1H-cyclopenta[a]phenanthrene-17-carboxylic acid methyl ester	5.6495	-1	-1		C23H36O4		HZUUHCXBSGFHDC-UHFFFAOYSA-N	O=C(OC1CCC2(C)C(CCC3C4CCC(C(=O)OC)C4(C)CCC32)C1)C
81	(Z)-5-[(1R,4aR,8aR)-5,5,8a-trimethyl-2-methylene-decalin-1-yl]-3-(acetoxymethyl)pent-2-enoic acid methyl ester	5.6443	-1	-1		C23H36O4	Diterpenoids	FALZOOWSJAQSFX-OATHEDFASA-N	O=C(OC)C=C(COC(=O)C)CCC1C(=C)CCC2C(C)(C)CCCC12C
82	(3S,4S)-3-decyl-4-homoveratryl-oxetan-2-one	5.5726	-1	-1		C23H36O4	Dimethoxybenzenes	ASVWFAVGLYUDFD-PMACEKPBSA-N	O=C1OC(CCC2=CC=C(OC)C(OC)=C2)C1CCCCCCCCCC
83	3-(3,4-dihydroxyphenyl)acrylic acid myristyl ester	5.5708	-1	-1		C23H36O4	Coumaric acids and derivatives	JQXKUQVEHIHCEL-UHFFFAOYSA-N	O=C(OCCCCCCCCCCCCCC)C=CC1=CC=C(O)C(O)=C1
84	lauric acid (6-propyl-1,3-benzodioxol-5-yl)methyl ester	5.5437	-1	-1		C23H36O4	Benzodioxoles	VEAUXADIACPWHQ-UHFFFAOYSA-N	O=C(OCC1=CC=2OCOC2C=C1CCC)CCCCCCCCCCC
85	formic acid [(3R,5R,8R,9S,10S,13S,14S,17S)-17-[(1S)-1-formyloxyethyl]-10,13-dimethyl-2,3,4,5,6,7,8,9,11,12,14,15,16,17-tetradecahydro-1H-cyclopenta[a]phenanthren-3-yl] ester	5.5244	-1	-1		C23H36O4	Steroid esters	BLLDJXKMYCTWAL-KWGFJICNSA-N	O=COC1CCC2(C)C(CCC3C4CCC(C(OC=O)C)C4(C)CCC32)C1
86	44667441	5.4971	-1	-1		C23H36O4	Steroids and steroid derivatives	MNFVYVHTLBDTIR-RYHLCRTJSA-N	O1CCOC12CCC3(C)C(CCC4C3CCC5(C)C4CCC65OCCO6)C2
87	palmitic acid (4-formyl-3-hydroxy-phenyl) ester	5.4212	-1	-1		C23H36O4	Phenol esters	BXTJLOGYBNKICI-UHFFFAOYSA-N	O=CC1=CC=C(OC(=O)CCCCCCCCCCCCCCC)C=C1O
88	UNPD145356	5.3958	-1	-1	UNPD=UNPD145356	C23H36O4	Phenol esters	MOQCCBMSJIGZAY-UHFFFAOYSA-N	O=C(OC=1C=C(OC(=O)C)C=C(C1)CCCCCCCCCCCCC)C
89	3-(3,4-dimethoxyphenyl)acrylic acid lauryl ester	5.3655	-1	-1		C23H36O4	Coumaric acids and derivatives	MKAHKRGPOWFCRA-UHFFFAOYSA-N	O=C(OCCCCCCCCCCCC)C=CC1=CC=C(OC)C(OC)=C1
90	UNPD145523	5.2956	-1	-1	UNPD=UNPD145523	C23H36O4	Benzoic acid esters	WDKDWGAZDTVMSX-QINVSXPYNA-N	O=C(OCC(CC)CCCC)C=1C=CC=CC1C(=O)OC(CC)CCCC
91	8-(4-heptoxyphenyl)-8-keto-caprylic acid ethyl ester	5.2297	-1	-1		C23H36O4	Alkyl-phenylketones	IYXQONPNRHZGEJ-UHFFFAOYSA-N	O=C(OCC)CCCCCCC(=O)C1=CC=C(OCCCCCCC)C=C1
92	16-benzoxy-16-keto-palmitic acid	5.2239	-1	-1		C23H36O4		RKIWVFNLOSNCET-UHFFFAOYSA-N	O=C(O)CCCCCCCCCCCCCCC(=O)OCC=1C=CC=CC1
93	2-methylacrylic acid [4-[1-(4-methacryloyloxycyclohexyl)-1-methyl-ethyl]cyclohexyl] ester	5.2222	-1	-1		C23H36O4	Dicarboxylic acids and derivatives	RIVWLNPMWPTCEP-UHFFFAOYSA-N	O=C(OC1CCC(CC1)C(C)(C)C2CCC(OC(=O)C(=C)C)CC2)C(=C)C
94	2-benzylsuccinic acid dihexyl ester	5.1549	-1	-1		C23H36O4	Fatty acid esters	AOFAEZFJFYMIRK-UHFFFAOYSA-N	O=C(OCCCCCC)CC(C(=O)OCCCCCC)CC=1C=CC=CC1
95	2-(2,5-ditert-butyl-4-methoxy-phenoxy)acetic acid cyclohexyl ester	5.1511	-1	-1		C23H36O4	Phenoxyacetic acid derivatives	CBJNZRDZUJWBHK-UHFFFAOYSA-N	O=C(OC1CCCCC1)COC2=CC(=C(OC)C=C2C(C)(C)C)C(C)(C)C
96	2-[2-(4-octylphenyl)ethyl]malonic acid diethyl ester	5.1351	-1	-1		C23H36O4	Fatty acid esters	LCHJGKFPZIGJIG-UHFFFAOYSA-N	O=C(OCC)C(C(=O)OCC)CCC1=CC=C(C=C1)CCCCCCCC
97	benzene-1,2-dicarboxylic acid O1-butyl ester O2-undecyl ester	4.8706	-1	-1		C23H36O4	Benzoic acid esters	KBQHBASXOKFXLL-UHFFFAOYSA-N	O=C(OCCCC)C=1C=CC=CC1C(=O)OCCCCCCCCCCC
98	2-[1-(2,6-diketo-4,4-dimethyl-cyclohexyl)heptyl]-5,5-dimethyl-cyclohexane-1,3-quinone	4.8702	-1	-1		C23H36O4	Sesquiterpenoids	QPPNXFMBMTZHTE-UHFFFAOYSA-N	O=C1CC(C)(C)CC(=O)C1C(CCCCCC)C2C(=O)CC(C)(C)CC2=O
99	3-keto-3-(4-lauryloxyphenyl)propionic acid ethyl ester	4.8587	-1	-1		C23H36O4		QQDSFCLBGPZSQQ-UHFFFAOYSA-N	O=C(OCC)CC(=O)C1=CC=C(OCCCCCCCCCCCC)C=C1
100	benzene-1,2-dicarboxylic acid O1-amyl ester O2-decyl ester	4.7825	-1	-1		C23H36O4	Benzoic acid esters	XHKLYUHRVRGLII-UHFFFAOYSA-N	O=C(OCCCCC)C=1C=CC=CC1C(=O)OCCCCCCCCCC
101	benzene-1,2-dicarboxylic acid O2-isoamyl ester O1-(8-methylnonyl) ester	4.7659	-1	-1		C23H36O4		OGVGRFFGHFQWEM-UHFFFAOYSA-N	O=C(OCCCCCCCC(C)C)C=1C=CC=CC1C(=O)OCCC(C)C
102	benzene-1,2-dicarboxylic acid O1-hexyl ester O2-nonyl ester	4.7229	-1	-1		C23H36O4	Benzoic acid esters	JOKDLBAVBHGFGT-UHFFFAOYSA-N	O=C(OCCCCCC)C=1C=CC=CC1C(=O)OCCCCCCCCC
103	benzene-1,2-dicarboxylic acid O1-heptyl ester O2-octyl ester	4.7032	-1	-1		C23H36O4	Benzoic acid esters	KFGWBTZKOAMKOT-UHFFFAOYSA-N	O=C(OCCCCCCC)C=1C=CC=CC1C(=O)OCCCCCCCC
104		-1	-1	-1		C14H41N4O3PS
105		-1	-1	-1		C17H37N4O3P

## Sheet: MS-DIAL parameter setting
MS-DIAL ver. 4.24
#Project
MS1 Data type	Centroid
MS2 Data type	Centroid
Ion mode	Positive
Target	Lipidomics
Mode	ddMSMS
#Data collection parameters
Retention time begin	2
Retention time end	15
Mass range begin	140
Mass range end	1250
MS2 mass range begin	140
MS2 mass range end	1250
#Centroid parameters
MS1 tolerance	0.01
MS2 tolerance	0.025
#Isotope recognition
Maximum charged number	2
#Data processing
Number of threads	2
#Peak detection parameters
Smoothing method	LinearWeightedMovingAverage
Smoothing level	3
Minimum peak width	5
Minimum peak height	3000
#Peak spotting parameters
Mass slice width	0.1
Exclusion mass list (mass & tolerance)
#Deconvolution parameters
Sigma window value	0.5
MS2Dec amplitude cut off	0
Exclude after precursor	TRUE
Keep isotope until	0.5
Keep original precursor isotopes	FALSE
#MSP file and MS/MS identification setting
MSP file	C:\Users\yilu\Downloads\Data from laptop\Software_Yi\MSDIAL ver 4.24\LipidMsmsBinaryDB-VS68-FiehnO.lbm2
Retention time tolerance	100
Accurate mass tolerance (MS1)	0.01
Accurate mass tolerance (MS2)	0.05
Identification score cut off	80
Using retention time for scoring	FALSE
Using retention time for filtering	FALSE
#Selected lipid types
CAR	[M+H]+
LPC	[M+H]+
LPC	[M+Na]+
LPE	[M+H]+
PC	[M+H]+
PC	[M+Na]+
PE	[M+H]+
PE	[M+Na]+
PI	[M+NH4]+
PI	[M+Na]+
PS	[M+H]+
PS	[M+Na]+
PG	[M+NH4]+
BMP	[M+NH4]+
HBMP	[M+NH4]+
CL	[M+NH4]+
EtherLPC	[M+H]+
EtherLPE	[M+H]+
EtherPC	[M+H]+
EtherPE	[M+H]+
Sph	[M+H]+
DHSph	[M+H]+
PhytoSph	[M+H]+
SM	[M+H]+
SM	[M+Na]+
NAE	[M+H]+
MGDG	[M+NH4]+
DGDG	[M+NH4]+
EtherMGDG	[M+NH4]+
EtherDGDG	[M+NH4]+
LDGTS	[M+H]+
DGTS	[M+H]+
LDGCC	[M+H]+
DGCC	[M+H]+
SQDG	[M+NH4]+
DGGA	[M+NH4]+
SHexCer	[M+H]+
GM3	[M+NH4]+
ADGGA	[M+NH4]+
MG	[M+NH4]+
DG	[M+NH4]+
DG	[M+Na]+
EtherDG	[M+NH4]+
TG	[M+NH4]+
TG	[M+Na]+
EtherTG	[M+NH4]+
EtherTG	[M+Na]+
CE	[M+NH4]+
BRSE	[M+NH4]+
CASE	[M+NH4]+
SISE	[M+NH4]+
STSE	[M+NH4]+
AHexCS	[M+NH4]+
AHexBRS	[M+NH4]+
AHexCAS	[M+NH4]+
AHexSIS	[M+NH4]+
AHexSTS	[M+NH4]+
SHex	[M+NH4]+
SSulfate	[M+NH4]+
BASulfate	[M+NH4]+
Cholesterol	[M+NH4]+
Cholesterol	[M+Na]+
Cholesterol	[M-H2O+H]+
CoQ	[M+H]+
Vitamin_D	[M+H]+
Vitamin_D	[M+Na]+
VAE	[M+H]+
VAE	[M+Na]+
DCAE	[M+NH4]+
GDCAE	[M+NH4]+
GLCAE	[M+NH4]+
TDCAE	[M+NH4]+
TLCAE	[M+NH4]+
NAGly	[M+H]+
NAGly	[M+NH4]+
NAGlySer	[M+H]+
NAGlySer	[M+NH4]+
NAOrn	[M+H]+
SL	[M+H]+
SL	[M+NH4]+
Cer_NS	[M+H]+
Cer_NS	[M+H-H2O]+
Cer_NS	[M+Na]+
Cer_NDS	[M+H]+
Cer_NDS	[M+H-H2O]+
Cer_NDS	[M+Na]+
Cer_EOS	[M+H]+
Cer_AP	[M+H]+
Cer_AP	[M+H-H2O]+
Cer_HS	[M+H]+
Cer_HS	[M+H-H2O]+
Cer_HDS	[M+H]+
Cer_HDS	[M+H-H2O]+
CerP	[M+H]+
HexCer_NS	[M+H]+
HexCer_NS	[M+H-H2O]+
HexCer_NDS	[M+H]+
HexCer_NDS	[M+H-H2O]+
HexCer_AP	[M+H]+
HexCer_AP	[M+H-H2O]+
HexCer_EOS	[M+H]+
HexCer_HS	[M+H]+
HexCer_HS	[M+H-H2O]+
HexCer_HDS	[M+H]+
HexCer_HDS	[M+H-H2O]+
Hex2Cer	[M+H]+
Hex3Cer	[M+H]+
PI_Cer	[M+H]+
AHexCer	[M+H]+
ASM	[M+H]+
MMPE	[M+H]+
DMPE	[M+H]+
EGSE	[M+H]+
EGSE	[M+NH4]+
EGSE	[M+Na]+
DEGSE	[M+H]+
DEGSE	[M+NH4]+
DEGSE	[M+Na]+
DSMSE	[M+NH4]+
OxTG	[M+NH4]+
TG_EST	[M+NH4]+
MIPC	[M+H]+
LCAE	[M+NH4]+
KLCAE	[M+NH4]+
KDCAE	[M+NH4]+
#Text file and post identification (retention time and accurate mass based) setting
Text file
Retention time tolerance	0.1
Accurate mass tolerance	0.01
Identification score cut off	85
#Advanced setting for identification
Relative abundance cut off	0
Top candidate report	FALSE
#Adduct ion setting
[M+H]+
[M+NH4]+
[M+Na]+
[M+CH3OH+H]+
[M+K]+
[M+ACN+H]+
[M+H-H2O]+
[M+H-2H2O]+
[2M+H]+
[2M+NH4]+
[2M+Na]+
#Alignment parameters setting
Reference file	C:\Users\yilu\Downloads\Louis -SEAPAR+Chicory\LCMS Data\2018-11-12-lborn\MS-DIAL-2018-11-12-lborn\LBORN0248_BB8_01_22439.abf
Retention time tolerance	0.05
MS1 tolerance	0.015
Retention time factor	0.5
MS1 factor	0.5
Peak count filter	0
N% detected in at least one group	0
Remove feature based on peak height fold-change	FALSE
Sample max / blank average	5
Sample average / blank average	5
Keep identified and annotated metabolites	TRUE
Keep removable features and assign the tag for checking	TRUE
Gap filling by compulsion	TRUE
#Tracking of isotope labels
Tracking of isotopic labels	FALSE
#Ion mobility
Ion mobility data	FALSE
